# Supplementary material for: Polyclonal human antibodies against glycans bearing red meat-derived non-human sialic acid N-glycolylneuraminic acid are stable, reproducible, complex and vary between individuals: Total antibody levels are associated with colorectal cancer risk
Source: PLoS One. 2018 Jun 18;13(6):e0197464. doi: 10.1371/journal.pone.0197464 (PMC6005533; doi:10.1371/journal.pone.0197464)
Supplement: S1 Dataset — (XLSX) [file pone.0197464.s005.xlsx]

## Sheet: EPIC 1 Neu5Gca2-PAA
EPIC 1: Anti-Neu5Gc IgG (ug/ml) quantified by ELISA using Neu5Gca2-polyacrylamide (Neu5Gca2-PAA) as the target antigen (N=2716)
			Negative values zeroed
Anti Neu5Gca2-PAA	Anti Neu5Gca2-PAA minus Anti Neu5Aca2-PAA		Anti Neu5Gca2-PAA	Anti Neu5Gca2-PAA minus Anti Neu5Aca2-PAA
2.28	-0.38		2.28	0
11.49	5.07		11.49	5.07
0.8	0.73		0.8	0.73
1.76	1.62		1.76	1.62
5.56	3.07		5.56	3.07
8.33	3.92		8.33	3.92
6.34	-1.17		6.34	0
38.67	36.1		38.67	36.1
2.15	0.75		2.15	0.75
5.89	0.47		5.89	0.47
2.28	-0.8		2.28	0
2.8	0.47		2.8	0.47
7.75	3.17		7.75	3.17
10.59	-7.28		10.59	0
5	1.1		5	1.1
5.56	2.71		5.56	2.71
4.25	1.99		4.25	1.99
3.87	0.57		3.87	0.57
16.32	11.3		16.32	11.3
5.06	1.76		5.06	1.76
8	2.83		8	2.83
7	2.95		7	2.95
36.47	30.55		36.47	30.55
2.12	0.54		2.12	0.54
11.94	4.3		11.94	4.3
7.06	1.22		7.06	1.22
3.24	1.82		3.24	1.82
20.14	16.92		20.14	16.92
9.67	1.66		9.67	1.66
6.75	0.98		6.75	0.98
3.06	-1.03		3.06	0
7.13	2.25		7.13	2.25
0.07	-0.32		0.07	0
8.4	-1.07		8.4	0
8.09	-2.28		8.09	0
4.78	0.69		4.78	0.69
6.37	-1.42		6.37	0
30.72	25.4		30.72	25.4
9.36	4.93		9.36	4.93
9.87	-2.63		9.87	0
20.8	-2.56		20.8	0
7.39	0.49		7.39	0.49
6.87	2.29		6.87	2.29
14.37	6.71		14.37	6.71
5.62	2.55		5.62	2.55
7.64	6.2		7.64	6.2
3.65	1.51		3.65	1.51
16.15	12.09		16.15	12.09
6.03	0.58		6.03	0.58
5.73	4.35		5.73	4.35
7.22	5.26		7.22	5.26
11.69	6.18		11.69	6.18
6.87	-12.18		6.87	0
10.44	9.46		10.44	9.46
7.76	5.5		7.76	5.5
15.56	9.12		15.56	9.12
12.24	5.06		12.24	5.06
6.95	2.94		6.95	2.94
7.55	-49.53		7.55	0
5.14	0.87		5.14	0.87
8.82	3.79		8.82	3.79
10.1	5.75		10.1	5.75
42.47	35.54		42.47	35.54
5.27	-0.11		5.27	0
10.03	3.27		10.03	3.27
5.27	0.92		5.27	0.92
4.47	-0.57		4.47	0
7.48	-7.43		7.48	0
5.61	-0.2		5.61	0
6.48	0.67		6.48	0.67
6.66	-0.98		6.66	0
9.06	1.42		9.06	1.42
6	0.61		6	0.61
27.43	10.09		27.43	10.09
15.31	5.77		15.31	5.77
12.07	3.44		12.07	3.44
15.79	3.69		15.79	3.69
7.98	3.02		7.98	3.02
12.19	5.09		12.19	5.09
10.5	4.02		10.5	4.02
12.19	5.76		12.19	5.76
7.98	1.68		7.98	1.68
12.25	5.88		12.25	5.88
9.3	0.62		9.3	0.62
2.87	-0.54		2.87	0
4.79	1.17		4.79	1.17
35.59	31.12		35.59	31.12
3.41	0.36		3.41	0.36
1.79	-1.26		1.79	0
5.28	0.31		5.28	0.31
10.54	2.17		10.54	2.17
3.31	1.04		3.31	1.04
2.97	1.83		2.97	1.83
31.52	-0.52		31.52	0
5.92	1.37		5.92	1.37
1.84	0.48		1.84	0.48
2.33	1.54		2.33	1.54
14.07	7.83		14.07	7.83
4.41	-0.09		4.41	0
3.62	0.75		3.62	0.75
1.6	-1		1.6	0
20.35	9.43		20.35	9.43
6.26	1.76		6.26	1.76
3.79	0.73		3.79	0.73
12.49	0.76		12.49	0.76
1.94	-0.22		1.94	0
57.95	56.78		57.95	56.78
1.55	-0.25		1.55	0
16.19	12.59		16.19	12.59
6.26	-0.59		6.26	0
12.32	7.1		12.32	7.1
6.54	-1.3		6.54	0
3.96	2.31		3.96	2.31
5.08	1.6		5.08	1.6
2.48	0.89		2.48	0.89
14.49	12.43		14.49	12.43
5.49	2.35		5.49	2.35
9.07	7.01		9.07	7.01
4.16	0.68		4.16	0.68
2.58	1.33		2.58	1.33
5.13	3.01		5.13	3.01
5.13	2.19		5.13	2.19
2.42	0.5		2.42	0.5
3.09	1.1		3.09	1.1
13.77	12.05		13.77	12.05
7.89	-0.13		7.89	0
3.27	-1.64		3.27	0
19.83	15.46		19.83	15.46
3.86	0.37		3.86	0.37
4.44	2.49		4.44	2.49
29.83	18.45		29.83	18.45
2.05	-1.33		2.05	0
4.39	-2.17		4.39	0
50.78	46.74		50.78	46.74
3.92	-1.33		3.92	0
4.97	-3.89		4.97	0
5.97	-0.81		5.97	0
19.36	9.62		19.36	9.62
4.97	1.48		4.97	1.48
67.51	59.63		67.51	59.63
4.52	-7.2		4.52	0
2.33	-2.48		2.33	0
4.05	-6.34		4.05	0
4.41	-0.67		4.41	0
0.3	-0.13		0.3	0
5.3	-0.18		5.3	0
5.35	-5.97		5.35	0
8.67	1.34		8.67	1.34
-0.27	-1.1		0	0
-0.01	-0.44		0	0
3.48	-21.78		3.48	0
1.5	-2.38		1.5	0
1.03	-8.03		1.03	0
3.94	-7.24		3.94	0
3.87	-3.39		3.87	0
0.67	-1.52		0.67	0
0.67	-1.02		0.67	0
5.79	3.1		5.79	3.1
6.73	0.57		6.73	0.57
0.91	-1.11		0.91	0
17.48	10.05		17.48	10.05
19.2	13.8		19.2	13.8
4.96	3.44		4.96	3.44
1.65	-1.3		1.65	0
1.85	1.43		1.85	1.43
51.88	51.64		51.88	51.64
1.75	0.66		1.75	0.66
4.81	1.01		4.81	1.01
0.87	-2.92		0.87	0
2.04	-0.74		2.04	0
1.03	-0.97		1.03	0
15.93	10.04		15.93	10.04
2.09	1.41		2.09	1.41
2.75	-4.15		2.75	0
51.62	45.65		51.62	45.65
16.84	15		16.84	15
1.18	0.27		1.18	0.27
7.31	4.77		7.31	4.77
4.02	-0.55		4.02	0
6.3	4.84		6.3	4.84
30.28	-7.76		30.28	0
5.79	-1.11		5.79	0
4.57	0.76		4.57	0.76
2.77	-1.91		2.77	0
3.67	2.37		3.67	2.37
23.87	16.24		23.87	16.24
1.98	0.89		1.98	0.89
0.88	0.98		0.88	0.98
8.7	4.82		8.7	4.82
3.22	1.33		3.22	1.33
2.77	2.42		2.77	2.42
5.06	4.35		5.06	4.35
7.5	5.83		7.5	5.83
1.63	0.18		1.63	0.18
4.72	2.97		4.72	2.97
7.75	2.04		7.75	2.04
1.23	-1.22		1.23	0
7.13	1.44		7.13	1.44
1.64	0.45		1.64	0.45
5.5	1.78		5.5	1.78
2.15	-0.31		2.15	0
33.64	29.29		33.64	29.29
5.4	-5.06		5.4	0
5.09	0.25		5.09	0.25
11.6	-0.48		11.6	0
5.25	1.17		5.25	1.17
16.88	15.55		16.88	15.55
5.81	1.17		5.81	1.17
8.04	-0.03		8.04	0
5.91	0.78		5.91	0.78
11.28	5.68		11.28	5.68
10.7	4.57		10.7	4.57
17.66	10.16		17.66	10.16
27.27	18.17		27.27	18.17
9.67	3.31		9.67	3.31
14.47	8.48		14.47	8.48
57.05	49.8		57.05	49.8
16.16	7.86		16.16	7.86
13.97	7.59		13.97	7.59
9.2	4.48		9.2	4.48
9.43	4.2		9.43	4.2
12.93	6.36		12.93	6.36
7.28	2.8		7.28	2.8
13.05	5.89		13.05	5.89
5.37	1.93		5.37	1.93
7.79	5.11		7.79	5.11
6.03	4.63		6.03	4.63
92.43	29.57		92.43	29.57
1.36	0.61		1.36	0.61
7.48	4.29		7.48	4.29
12.34	5.02		12.34	5.02
4.94	2.89		4.94	2.89
3.97	0.46		3.97	0.46
4.2	2.36		4.2	2.36
5.02	1.26		5.02	1.26
5.29	2.76		5.29	2.76
5.88	4.11		5.88	4.11
7.16	2.96		7.16	2.96
5.65	1.74		5.65	1.74
5.69	0.15		5.69	0.15
31.67	14.85		31.67	14.85
18.51	5.82		18.51	5.82
32.39	28.76		32.39	28.76
6.45	2.9		6.45	2.9
10.6	3.93		10.6	3.93
6.19	2.92		6.19	2.92
5.81	3.48		5.81	3.48
10.14	7.39		10.14	7.39
9.34	7.42		9.34	7.42
5.12	2.44		5.12	2.44
17.67	5.86		17.67	5.86
8.39	3.39		8.39	3.39
4.6	0.84		4.6	0.84
22.18	19.05		22.18	19.05
6.3	4.22		6.3	4.22
7.08	3.7		7.08	3.7
8.9	5.28		8.9	5.28
20.87	17.49		20.87	17.49
8.16	1.81		8.16	1.81
10.68	5.48		10.68	5.48
3.86	2.48		3.86	2.48
6.3	3.49		6.3	3.49
3.4	1.74		3.4	1.74
22.65	18.74		22.65	18.74
10.21	6.8		10.21	6.8
10.68	6.81		10.68	6.81
7.19	1.68		7.19	1.68
11.48	5.54		11.48	5.54
3.6	-0.81		3.6	0
15.27	5.97		15.27	5.97
3.51	-1.26		3.51	0
3.72	-1.11		3.72	0
3.93	-2.44		3.93	0
4.3	0.32		4.3	0.32
5.54	0.46		5.54	0.46
22.53	18.13		22.53	18.13
10.73	4.74		10.73	4.74
3.56	-0.54		3.56	0
32.19	29.99		32.19	29.99
40.4	-1.55		40.4	0
-1.23	0		0	0
-1.23	0		0	0
-1.23	0		0	0
-1.23	0		0	0
-1.23	0		0	0
-1.23	0		0	0
-1.23	0		0	0
-1.23	0		0	0
-1.23	0		0	0
-1.23	0		0	0
-1.23	0		0	0
-1.23	0		0	0
-1.23	0		0	0
-1.23	0		0	0
-1.23	0		0	0
-1.23	0		0	0
-1.23	0		0	0
-1.23	0		0	0
-1.23	0		0	0
-1.23	0		0	0
-1.23	0		0	0
-1.23	0		0	0
-1.23	0		0	0
-1.23	0		0	0
-1.23	0		0	0
-1.23	0		0	0
-1.23	0		0	0
-1.23	0		0	0
-1.23	0		0	0
-1.23	0		0	0
-1.23	0		0	0
-1.23	0		0	0
-1.23	0		0	0
-1.23	0		0	0
-1.23	0		0	0
-1.23	0		0	0
-1.23	0		0	0
-1.23	0		0	0
-1.23	0		0	0
-1.23	0		0	0
-1.23	0		0	0
-1.23	0		0	0
-1.23	0		0	0
-1.23	0		0	0
-1.23	0		0	0
-1.23	0		0	0
-1.23	0		0	0
-1.23	0		0	0
-1.23	0		0	0
-1.23	0		0	0
-1.23	0		0	0
-1.23	0		0	0
-1.23	0		0	0
-1.23	0		0	0
-1.23	0		0	0
-1.23	0		0	0
-1.23	0		0	0
-1.23	0		0	0
-1.23	0		0	0
-1.23	0		0	0
-1.23	0		0	0
-1.23	0		0	0
-1.23	0		0	0
-1.23	0		0	0
-1.23	0		0	0
-1.23	0		0	0
-1.23	0		0	0
-1.23	0		0	0
-1.23	0		0	0
-1.23	0		0	0
6.82	-0.07		6.82	0
7.36	3.02		7.36	3.02
9.4	4.4		9.4	4.4
6.41	2.47		6.41	2.47
8.86	4.69		8.86	4.69
5.46	0.2		5.46	0.2
10.08	-0.28		10.08	0
5.1	1.59		5.1	1.59
3.97	0.94		3.97	0.94
6.69	2.39		6.69	2.39
10.44	4.43		10.44	4.43
10.21	6.57		10.21	6.57
8.13	1.77		8.13	1.77
10.21	2.89		10.21	2.89
4.76	2.44		4.76	2.44
8.29	5.05		8.29	5.05
6.44	5.04		6.44	5.04
5.89	3.15		5.89	3.15
7.03	4.02		7.03	4.02
15.39	8.56		15.39	8.56
10.39	6.11		10.39	6.11
13.92	7.41		13.92	7.41
9.13	6.58		9.13	6.58
6.69	4.34		6.69	4.34
7.53	4.2		7.53	4.2
45.48	44.11		45.48	44.11
8.16	5.78		8.16	5.78
10.01	5.24		10.01	5.24
55.46	50.85		55.46	50.85
11.53	5.85		11.53	5.85
13.05	8.03		13.05	8.03
13.62	6.37		13.62	6.37
21.36	13.33		21.36	13.33
51.49	41.07		51.49	41.07
16.08	8.42		16.08	8.42
8.65	4.56		8.65	4.56
6.93	5		6.93	5
9.13	5.17		9.13	5.17
66.5	62.33		66.5	62.33
31.25	26.82		31.25	26.82
17.34	10.34		17.34	10.34
16.92	6.46		16.92	6.46
3.97	0.63		3.97	0.63
8.38	5.48		8.38	5.48
14.74	4.82		14.74	4.82
19.56	13.29		19.56	13.29
7.31	3.05		7.31	3.05
6.33	3.11		6.33	3.11
11.12	4.73		11.12	4.73
4.99	2.81		4.99	2.81
17.1	7.26		17.1	7.26
4.62	2.04		4.62	2.04
6.98	4.85		6.98	4.85
27.36	12.59		27.36	12.59
5.59	3.53		5.59	3.53
6.85	2.38		6.85	2.38
6.19	3.44		6.19	3.44
2.7	1.6		2.7	1.6
5	1.83		5	1.83
3.93	-1.32		3.93	0
4.75	0.81		4.75	0.81
4.46	-0.21		4.46	0
6.11	0.71		6.11	0.71
4.75	2.85		4.75	2.85
5.37	2.62		5.37	2.62
21.52	18.08		21.52	18.08
27.36	18.92		27.36	18.92
8.49	6.28		8.49	6.28
7.05	5.15		7.05	5.15
10.05	3.42		10.05	3.42
28.79	16.15		28.79	16.15
8.73	4.57		8.73	4.57
7.64	3.68		7.64	3.68
19.2	10		19.2	10
9.61	3.97		9.61	3.97
9.64	5.46		9.64	5.46
7.78	2.93		7.78	2.93
18.08	11.09		18.08	11.09
6.94	2.19		6.94	2.19
31.39	17.48		31.39	17.48
22.79	17.12		22.79	17.12
9.86	4.88		9.86	4.88
9.75	4.51		9.75	4.51
15.9	8.37		15.9	8.37
9.95	5.35		9.95	5.35
41.02	35.68		41.02	35.68
8.75	5.12		8.75	5.12
10.83	5.93		10.83	5.93
10.94	6.83		10.94	6.83
4.74	2.67		4.74	2.67
6.93	2.32		6.93	2.32
5.29	3.31		5.29	3.31
4.63	2.98		4.63	2.98
3.14	2.19		3.14	2.19
10.21	6.9		10.21	6.9
5.69	3.15		5.69	3.15
8.31	5.12		8.31	5.12
7.4	3		7.4	3
7.38	3.9		7.38	3.9
3.53	0.9		3.53	0.9
20.61	9.21		20.61	9.21
10.99	6.74		10.99	6.74
5.3	0.48		5.3	0.48
5.72	2.21		5.72	2.21
6.71	2.72		6.71	2.72
22.31	20.11		22.31	20.11
43.92	40.92		43.92	40.92
5.15	2.38		5.15	2.38
3.92	2.17		3.92	2.17
2.29	1.23		2.29	1.23
2.93	1.98		2.93	1.98
9.19	3.54		9.19	3.54
9.63	5.39		9.63	5.39
6.39	3.44		6.39	3.44
48.95	46.33		48.95	46.33
6	2.65		6	2.65
10.4	5.96		10.4	5.96
5.44	2.76		5.44	2.76
9.07	3.04		9.07	3.04
9.1	7.86		9.1	7.86
8.54	2.1		8.54	2.1
10.16	5.83		10.16	5.83
5.97	2.38		5.97	2.38
5.02	2.6		5.02	2.6
9.49	7.89		9.49	7.89
24.7	18		24.7	18
8.99	5.77		8.99	5.77
10.78	5.02		10.78	5.02
5.49	1.58		5.49	1.58
5.15	2.19		5.15	2.19
12.07	3.51		12.07	3.51
9.98	6.23		9.98	6.23
6.78	1.63		6.78	1.63
4.61	1.58		4.61	1.58
14.2	11.1		14.2	11.1
3.51	1.39		3.51	1.39
11.08	1.91		11.08	1.91
7.28	1.71		7.28	1.71
12.3	8.7		12.3	8.7
10.13	3.46		10.13	3.46
18.33	13.84		18.33	13.84
12.11	7.13		12.11	7.13
15.42	11.42		15.42	11.42
6.51	3.84		6.51	3.84
9.91	5.34		9.91	5.34
9.2	5.33		9.2	5.33
8.58	5.68		8.58	5.68
25.39	14.57		25.39	14.57
8.58	5.65		8.58	5.65
5.85	3.51		5.85	3.51
10.3	7.42		10.3	7.42
7.04	4.52		7.04	4.52
12.55	6.89		12.55	6.89
10.66	6.87		10.66	6.87
6.39	3.64		6.39	3.64
23.07	19.99		23.07	19.99
16.83	5.95		16.83	5.95
6.34	4.86		6.34	4.86
12.4	8.75		12.4	8.75
5.64	4.56		5.64	4.56
23.46	19.64		23.46	19.64
9.77	6.07		9.77	6.07
26.23	20.71		26.23	20.71
27.59	17.77		27.59	17.77
5.2	3.65		5.2	3.65
20.61	13.66		20.61	13.66
12.49	8.69		12.49	8.69
9.55	6.8		9.55	6.8
9.29	3.72		9.29	3.72
8.46	5.35		8.46	5.35
10.12	5.82		10.12	5.82
10.78	5.21		10.78	5.21
5.8	3.87		5.8	3.87
9.55	4.6		9.55	4.6
10.38	5.55		10.38	5.55
8.46	5.94		8.46	5.94
16.63	14.3		16.63	14.3
10.78	6.81		10.78	6.81
13.92	8.6		13.92	8.6
6.37	4.32		6.37	4.32
21.86	15.14		21.86	15.14
10.21	6.3		10.21	6.3
7.25	4.31		7.25	4.31
8.49	4.93		8.49	4.93
8.85	5.64		8.85	5.64
11.75	8.19		11.75	8.19
7.94	5.42		7.94	5.42
15.06	10.27		15.06	10.27
11.61	7.44		11.61	7.44
10.23	5.7		10.23	5.7
6.14	4.16		6.14	4.16
13.59	8.46		13.59	8.46
7.8	4.94		7.8	4.94
8.3	5.2		8.3	5.2
7.57	6.06		7.57	6.06
9.13	5.27		9.13	5.27
9.19	6.24		9.19	6.24
19.47	12.41		19.47	12.41
6.26	4.71		6.26	4.71
6.66	4.9		6.66	4.9
6.13	4.31		6.13	4.31
4.8	1.93		4.8	1.93
5.95	4.14		5.95	4.14
7.64	5.53		7.64	5.53
10.56	6.91		10.56	6.91
4.13	3.76		4.13	3.76
11.4	7.02		11.4	7.02
6.53	4.9		6.53	4.9
11.36	6.79		11.36	6.79
9.32	6.59		9.32	6.59
21.47	17.86		21.47	17.86
10.23	6.92		10.23	6.92
6.96	4.73		6.96	4.73
16.99	13.86		16.99	13.86
7.62	5.14		7.62	5.14
20.82	17.37		20.82	17.37
19.03	12.42		19.03	12.42
11.32	7.19		11.32	7.19
20.17	16.18		20.17	16.18
8.14	7.04		8.14	7.04
5.09	3.97		5.09	3.97
8.01	5.86		8.01	5.86
12.5	9.75		12.5	9.75
20.43	17.17		20.43	17.17
16.08	9.21		16.08	9.21
8.86	5.65		8.86	5.65
8.01	5.8		8.01	5.8
9.57	5.69		9.57	5.69
10.43	7.15		10.43	7.15
12.09	7.8		12.09	7.8
9.05	4.83		9.05	4.83
4.73	3.43		4.73	3.43
14.7	10.31		14.7	10.31
13.18	8.69		13.18	8.69
14.08	8.55		14.08	8.55
25.76	22.92		25.76	22.92
64.99	34.03		64.99	34.03
8.91	6.33		8.91	6.33
25.62	18.9		25.62	18.9
10.64	6.74		10.64	6.74
15.9	10.8		15.9	10.8
26.92	22.6		26.92	22.6
6	3.77		6	3.77
13.35	8.07		13.35	8.07
9.96	6.02		9.96	6.02
14.37	8.58		14.37	8.58
8.89	5.64		8.89	5.64
26.46	10.55		26.46	10.55
5.33	4.29		5.33	4.29
8.89	6.05		8.89	6.05
8.49	6.44		8.49	6.44
18.21	12.51		18.21	12.51
59.45	34.14		59.45	34.14
6.38	4.98		6.38	4.98
2.76	2.18		2.76	2.18
12.42	9.74		12.42	9.74
15.99	10.19		15.99	10.19
5.05	2.89		5.05	2.89
60.22	54.94		60.22	54.94
10.37	7.64		10.37	7.64
9.76	8.9		9.76	8.9
6.52	5.21		6.52	5.21
12.28	8.85		12.28	8.85
5.67	4.32		5.67	4.32
87.51	80.81		87.51	80.81
13.75	11.08		13.75	11.08
7.05	2.09		7.05	2.09
10.01	6.97		10.01	6.97
15.64	12.18		15.64	12.18
14.7	12.32		14.7	12.32
4.6	2.93		4.6	2.93
13.58	8.66		13.58	8.66
9.79	6.79		9.79	6.79
6.61	4.69		6.61	4.69
7.11	3.9		7.11	3.9
12.8	9.84		12.8	9.84
7.72	4.47		7.72	4.47
25.74	23.78		25.74	23.78
16.54	9.62		16.54	9.62
11.4	7.49		11.4	7.49
92.85	85.59		92.85	85.59
13.54	9.12		13.54	9.12
13.26	9.51		13.26	9.51
12.42	8.7		12.42	8.7
20.79	15.75		20.79	15.75
21.45	15.5		21.45	15.5
22.7	16.7		22.7	16.7
11.97	8.37		11.97	8.37
12.86	9.56		12.86	9.56
12.3	10.17		12.3	10.17
15.25	11.22		15.25	11.22
17.64	14.13		17.64	14.13
28.42	23.98		28.42	23.98
17.92	13.1		17.92	13.1
20.55	17.24		20.55	17.24
18.19	15.3		18.19	15.3
25.67	17.75		25.67	17.75
17.81	14.33		17.81	14.33
15.34	11.63		15.34	11.63
6.99	4.61		6.99	4.61
14.42	7.64		14.42	7.64
10.9	8.54		10.9	8.54
22.74	18.24		22.74	18.24
15.31	11.97		15.31	11.97
26.86	16.53		26.86	16.53
20.76	13.26		20.76	13.26
64.8	61.97		64.8	61.97
11.41	7.81		11.41	7.81
9.03	5.48		9.03	5.48
18.14	11.14		18.14	11.14
37.95	33.63		37.95	33.63
13.94	10.8		13.94	10.8
7.55	4.57		7.55	4.57
6.42	4.5		6.42	4.5
16.8	11.57		16.8	11.57
11.27	9.53		11.27	9.53
13.47	11.09		13.47	11.09
17.13	13.46		17.13	13.46
10.88	8.09		10.88	8.09
13.59	10.97		13.59	10.97
13.35	10.1		13.35	10.1
12.01	6.67		12.01	6.67
13.42	9.24		13.42	9.24
11.43	8.23		11.43	8.23
14.63	12.09		14.63	12.09
25.45	20.07		25.45	20.07
12.87	9.75		12.87	9.75
19.3	10.64		19.3	10.64
26.23	19.34		26.23	19.34
9.86	7.55		9.86	7.55
13.98	8.91		13.98	8.91
69.1	35.2		69.1	35.2
14.31	11.5		14.31	11.5
6.17	5.09		6.17	5.09
21.13	19.52		21.13	19.52
19.37	15.82		19.37	15.82
14.35	12.39		14.35	12.39
6.44	4.37		6.44	4.37
5.96	4.24		5.96	4.24
4.27	3.25		4.27	3.25
10.37	8.1		10.37	8.1
8.45	6.16		8.45	6.16
14.52	10.32		14.52	10.32
14.15	10.78		14.15	10.78
51.06	29.63		51.06	29.63
6.65	3.88		6.65	3.88
4.87	3.97		4.87	3.97
9.8	8.5		9.8	8.5
19.02	15.31		19.02	15.31
17.73	13.66		17.73	13.66
4.51	-2.24		4.51	0
9.64	4.77		9.64	4.77
18.1	14.19		18.1	14.19
11.36	7.71		11.36	7.71
10.99	5.59		10.99	5.59
5.7	0.56		5.7	0.56
15.82	10.26		15.82	10.26
8.76	5.15		8.76	5.15
20.91	12.29		20.91	12.29
8.4	6.13		8.4	6.13
7.52	5.36		7.52	5.36
9.54	7.65		9.54	7.65
9.59	6.56		9.59	6.56
73.33	66.22		73.33	66.22
14.31	8.57		14.31	8.57
6.64	4.26		6.64	4.26
6.44	3.22		6.44	3.22
7.88	5.03		7.88	5.03
31.15	26.41		31.15	26.41
18.87	11.44		18.87	11.44
7.43	3.28		7.43	3.28
19.61	16.26		19.61	16.26
11.69	7.37		11.69	7.37
8.57	5.14		8.57	5.14
56	46.3		56	46.3
9.71	6.78		9.71	6.78
9.36	5.09		9.36	5.09
7.78	4.05		7.78	4.05
14.65	9.07		14.65	9.07
9.56	5.66		9.56	5.66
5.92	3.95		5.92	3.95
10.77	7.23		10.77	7.23
10.97	8.85		10.97	8.85
6.21	3.69		6.21	3.69
7.74	4.35		7.74	4.35
7.18	5.75		7.18	5.75
17.44	13.61		17.44	13.61
6.12	5.1		6.12	5.1
4.31	2.48		4.31	2.48
28.31	12.28		28.31	12.28
6.49	-10.08		6.49	0
4.67	2.37		4.67	2.37
11.38	7.58		11.38	7.58
3.77	2.45		3.77	2.45
8.13	5.5		8.13	5.5
39.5	35.56		39.5	35.56
6.29	4.8		6.29	4.8
8.72	3.15		8.72	3.15
9.32	5.91		9.32	5.91
7.67	6.17		7.67	6.17
4.23	3.58		4.23	3.58
36.52	16.04		36.52	16.04
8.72	7.19		8.72	7.19
9.64	8		9.64	8
8.54	5.55		8.54	5.55
8.63	4.87		8.63	4.87
10.53	7.13		10.53	7.13
10.53	7.38		10.53	7.38
35.23	34.04		35.23	34.04
39.87	33.5		39.87	33.5
11.14	7.23		11.14	7.23
8.93	5.76		8.93	5.76
10.53	5.66		10.53	5.66
14.02	10.4		14.02	10.4
27.54	24.29		27.54	24.29
10.53	7.82		10.53	7.82
42.88	31.5		42.88	31.5
30.72	28.79		30.72	28.79
24.09	19.48		24.09	19.48
7.87	4.38		7.87	4.38
19.98	14.24		19.98	14.24
20.32	12.24		20.32	12.24
10.5	7.88		10.5	7.88
21.34	13.56		21.34	13.56
13.13	4.42		13.13	4.42
12.16	8.22		12.16	8.22
10.55	5.11		10.55	5.11
16.65	13.36		16.65	13.36
8	4.02		8	4.02
76.56	28.04		76.56	28.04
8.54	5.33		8.54	5.33
17.09	7.9		17.09	7.9
8.49	0.67		8.49	0.67
22.66	13.52		22.66	13.52
31.62	26.91		31.62	26.91
27.37	23.38		27.37	23.38
13.99	10.26		13.99	10.26
11.41	6.66		11.41	6.66
5.01	2.04		5.01	2.04
14.85	10.22		14.85	10.22
21.68	17.14		21.68	17.14
19.39	16.94		19.39	16.94
10.55	5.88		10.55	5.88
12.17	5.67		12.17	5.67
10.31	6.45		10.31	6.45
17.48	9.4		17.48	9.4
10.31	7.94		10.31	7.94
17.57	13.5		17.57	13.5
10.41	9.05		10.41	9.05
10.9	7.73		10.9	7.73
11.8	8.36		11.8	8.36
23.06	19.04		23.06	19.04
11.12	4.72		11.12	4.72
10.68	7.73		10.68	7.73
11.75	6.98		11.75	6.98
11.39	4.81		11.39	4.81
18.94	16.26		18.94	16.26
18.41	9.66		18.41	9.66
58.94	9.73		58.94	9.73
10.32	3.3		10.32	3.3
18.23	14.3		18.23	14.3
15.82	7.95		15.82	7.95
9.94	5.66		9.94	5.66
20.61	14.76		20.61	14.76
7.19	6.02		7.19	6.02
14.9	12.27		14.9	12.27
6.32	4.53		6.32	4.53
10.14	7.59		10.14	7.59
16.71	10.07		16.71	10.07
11.33	7.96		11.33	7.96
9.81	8.39		9.81	8.39
17.16	14.27		17.16	14.27
8.79	6.8		8.79	6.8
5.91	4.94		5.91	4.94
10.84	8.77		10.84	8.77
15.97	11.02		15.97	11.02
13.05	9.89		13.05	9.89
7.52	5.78		7.52	5.78
32.05	21.98		32.05	21.98
9.19	7.52		9.19	7.52
12.79	9.8		12.79	9.8
25.68	22.83		25.68	22.83
9.55	6.67		9.55	6.67
14.25	11.82		14.25	11.82
9.76	7.47		9.76	7.47
9.29	7.31		9.29	7.31
8.45	7.38		8.45	7.38
11.69	9.43		11.69	9.43
19.37	15.82		19.37	15.82
24.59	14.69		24.59	14.69
9.26	5.17		9.26	5.17
16.39	12.88		16.39	12.88
22.89	19.21		22.89	19.21
24.14	14.63		24.14	14.63
12.16	7.02		12.16	7.02
18.57	10.54		18.57	10.54
13.27	6.66		13.27	6.66
23.38	13.44		23.38	13.44
7.93	4.44		7.93	4.44
15.77	10.17		15.77	10.17
12.47	7.31		12.47	7.31
15.28	9.01		15.28	9.01
8.86	5.09		8.86	5.09
31.89	18.93		31.89	18.93
74.8	34.24		74.8	34.24
11.07	6.43		11.07	6.43
23.54	16.1		23.54	16.1
10.23	5.42		10.23	5.42
9.67	6.79		9.67	6.79
32.02	24.32		32.02	24.32
10.37	5.33		10.37	5.33
11.12	5.88		11.12	5.88
12.9	7.99		12.9	7.99
8.87	6.02		8.87	6.02
6.99	5.68		6.99	5.68
12.38	8.07		12.38	8.07
9.81	6.06		9.81	6.06
7.04	4.13		7.04	4.13
14.1	7.71		14.1	7.71
15.94	8.95		15.94	8.95
9.46	5		9.46	5
10.91	7.71		10.91	7.71
21.08	12.16		21.08	12.16
22.17	15.14		22.17	15.14
11.61	5.22		11.61	5.22
8.86	3.26		8.86	3.26
15.49	10.29		15.49	10.29
5.67	3.13		5.67	3.13
9.46	4.83		9.46	4.83
19.78	4.82		19.78	4.82
9.66	6.54		9.66	6.54
6.37	2.72		6.37	2.72
51.21	47.7		51.21	47.7
7.84	4.8		7.84	4.8
119.37	115.36		119.37	115.36
10.95	6.43		10.95	6.43
4.93	3.11		4.93	3.11
5.61	3.39		5.61	3.39
16.62	10.85		16.62	10.85
4.98	3.3		4.98	3.3
6.1	3.2		6.1	3.2
6.92	4.49		6.92	4.49
7.26	4.65		7.26	4.65
25.55	24.16		25.55	24.16
7.26	2.96		7.26	2.96
12.64	7.16		12.64	7.16
7.32	-1.28		7.32	0
12.96	6.69		12.96	6.69
45.59	38.92		45.59	38.92
45.96	34.53		45.96	34.53
46.79	23.83		46.79	23.83
4.97	1.71		4.97	1.71
32.41	10.79		32.41	10.79
8.42	4.17		8.42	4.17
8.21	4.36		8.21	4.36
4.39	2.28		4.39	2.28
8.78	3.6		8.78	3.6
17.93	5.17		17.93	5.17
20.34	9.41		20.34	9.41
9.57	3.44		9.57	3.44
6.39	3.67		6.39	3.67
6.64	5.02		6.64	5.02
11.93	7.5		11.93	7.5
5.11	3.85		5.11	3.85
11.97	7.44		11.97	7.44
18.35	14.28		18.35	14.28
7.48	3.58		7.48	3.58
10.05	4.44		10.05	4.44
13.38	9.45		13.38	9.45
8.76	5.12		8.76	5.12
8.24	3.99		8.24	3.99
7.44	3.79		7.44	3.79
21.32	16.32		21.32	16.32
13.22	5.94		13.22	5.94
7.3	4.71		7.3	4.71
10.28	6.48		10.28	6.48
22.84	11.44		22.84	11.44
8.75	5.92		8.75	5.92
6.63	3.43		6.63	3.43
8.54	3.2		8.54	3.2
9.82	-0.25		9.82	0
8.33	4.6		8.33	4.6
8.29	5.46		8.29	5.46
15.21	9.58		15.21	9.58
31.81	30.05		31.81	30.05
14.78	11.7		14.78	11.7
9	7.06		9	7.06
9.43	2.65		9.43	2.65
13.9	9.29		13.9	9.29
21.01	13.54		21.01	13.54
17.06	10.81		17.06	10.81
7.83	4.58		7.83	4.58
12.07	7.04		12.07	7.04
6.56	4.58		6.56	4.58
7.83	3.88		7.83	3.88
8.02	4.58		8.02	4.58
12.49	8.68		12.49	8.68
12.68	7.56		12.68	7.56
74.76	72.96		74.76	72.96
8.44	5.52		8.44	5.52
35.13	12.47		35.13	12.47
9.05	3.37		9.05	3.37
62.54	23.53		62.54	23.53
14.11	4.37		14.11	4.37
9.23	6.32		9.23	6.32
18.36	12.66		18.36	12.66
8.85	5.32		8.85	5.32
6.45	4.13		6.45	4.13
6.2	4.53		6.2	4.53
16.29	9.66		16.29	9.66
9.48	5.49		9.48	5.49
7	4.63		7	4.63
7	5.88		7	5.88
8.64	4.76		8.64	4.76
8.05	5.03		8.05	5.03
14.11	5.34		14.11	5.34
6.05	3.87		6.05	3.87
10.18	6.69		10.18	6.69
17.37	9.54		17.37	9.54
17.52	6.8		17.52	6.8
37.94	32.44		37.94	32.44
6.89	3.88		6.89	3.88
10.54	5.55		10.54	5.55
10.32	7.32		10.32	7.32
16.76	10.7		16.76	10.7
9.71	6.7		9.71	6.7
19.07	8.73		19.07	8.73
13.86	8.94		13.86	8.94
12.89	7.01		12.89	7.01
13.72	6.43		13.72	6.43
10.41	7.97		10.41	7.97
8.51	6.45		8.51	6.45
14.98	12.55		14.98	12.55
19.42	16.66		19.42	16.66
15.39	11.69		15.39	11.69
12.61	9.49		12.61	9.49
14.44	12.79		14.44	12.79
11.19	9.2		11.19	9.2
8.68	6.42		8.68	6.42
11.15	8.43		11.15	8.43
64.72	60		64.72	60
10.78	8.54		10.78	8.54
34.64	29.37		34.64	29.37
17.9	13.96		17.9	13.96
5.01	2.64		5.01	2.64
7.93	5.56		7.93	5.56
16.69	12.84		16.69	12.84
18.23	13		18.23	13
11.31	4.91		11.31	4.91
90.71	85.15		90.71	85.15
69.31	64.19		69.31	64.19
10.35	8.01		10.35	8.01
9.28	6.56		9.28	6.56
4.28	2.68		4.28	2.68
7.2	4.26		7.2	4.26
4.21	3.04		4.21	3.04
14.35	5.4		14.35	5.4
4.59	2.48		4.59	2.48
12.53	8.03		12.53	8.03
9.11	7.28		9.11	7.28
7.44	5.08		7.44	5.08
14.46	11.25		14.46	11.25
7.66	4.78		7.66	4.78
7.22	4.36		7.22	4.36
21.29	14.74		21.29	14.74
17.54	10.96		17.54	10.96
10.15	5.89		10.15	5.89
5.62	4.08		5.62	4.08
30.21	23.19		30.21	23.19
4.73	3.84		4.73	3.84
7.59	5.35		7.59	5.35
15.87	11.2		15.87	11.2
7.25	4.95		7.25	4.95
8.61	5.34		8.61	5.34
12.28	8.42		12.28	8.42
5.06	2.99		5.06	2.99
5.39	3.35		5.39	3.35
7	3.88		7	3.88
45.87	42.49		45.87	42.49
7.37	4.48		7.37	4.48
8.36	5.24		8.36	5.24
99.19	96.7		99.19	96.7
12.49	7.31		12.49	7.31
9.27	6.93		9.27	6.93
12.2	6.65		12.2	6.65
9.4	5.15		9.4	5.15
13.92	6.67		13.92	6.67
17.59	9.7		17.59	9.7
6.21	4.22		6.21	4.22
6.21	4.9		6.21	4.9
7.34	4.31		7.34	4.31
5.2	2.85		5.2	2.85
16.01	13.01		16.01	13.01
5.2	4.66		5.2	4.66
9.24	6.2		9.24	6.2
5.77	4.02		5.77	4.02
5.77	4.96		5.77	4.96
8.15	6.03		8.15	6.03
19.36	17.81		19.36	17.81
24.85	19.83		24.85	19.83
5.07	3.64		5.07	3.64
10.69	6.8		10.69	6.8
13.88	10.73		13.88	10.73
13.88	10.47		13.88	10.47
13.68	7.56		13.68	7.56
14.08	10.64		14.08	10.64
14.39	8.43		14.39	8.43
15.3	10.7		15.3	10.7
16.21	12		16.21	12
18.29	14.69		18.29	14.69
7	4.59		7	4.59
11.45	6.85		11.45	6.85
8.72	5.28		8.72	5.28
23.35	17.68		23.35	17.68
7.66	4.59		7.66	4.59
24.46	21.93		24.46	21.93
9.92	7.08		9.92	7.08
11.64	7.87		11.64	7.87
17.97	15.6		17.97	15.6
6.53	2.53		6.53	2.53
36.34	33.08		36.34	33.08
4.22	2.24		4.22	2.24
18.76	17.32		18.76	17.32
4.37	3.24		4.37	3.24
4.52	3.42		4.52	3.42
5.99	4.97		5.99	4.97
8.05	4.71		8.05	4.71
26.42	20.72		26.42	20.72
5.59	2		5.59	2
10.72	8.46		10.72	8.46
7.34	6		7.34	6
9.65	7.8		9.65	7.8
10.83	8.47		10.83	8.47
6.55	4.67		6.55	4.67
12.58	10.09		12.58	10.09
13.87	9.68		13.87	9.68
11.96	9.31		11.96	9.31
6.77	5.59		6.77	5.59
11.34	8.66		11.34	8.66
12.41	11.35		12.41	11.35
9.08	6.89		9.08	6.89
13.14	10.78		13.14	10.78
10.14	5.47		10.14	5.47
9.8	5.89		9.8	5.89
10.09	6.22		10.09	6.22
4.99	3.32		4.99	3.32
12.44	5.17		12.44	5.17
9.42	6.43		9.42	6.43
5.67	2.2		5.67	2.2
2.78	2.91		2.78	2.91
9.7	7.83		9.7	7.83
4.56	3.89		4.56	3.89
4.47	3		4.47	3
29.65	12.18		29.65	12.18
6.34	4.15		6.34	4.15
5.04	2.93		5.04	2.93
13.41	4.23		13.41	4.23
16.85	14.33		16.85	14.33
7.51	4.91		7.51	4.91
14.5	11.3		14.5	11.3
7.84	5.72		7.84	5.72
4.67	3.59		4.67	3.59
6.25	4.81		6.25	4.81
7.89	4.17		7.89	4.17
8.27	7.71		8.27	7.71
6.31	4.59		6.31	4.59
8.49	6.21		8.49	6.21
6.91	-2.71		6.91	0
46.4	29.28		46.4	29.28
9.48	6.32		9.48	6.32
8.57	4.49		8.57	4.49
11.64	7.05		11.64	7.05
10.71	5.8		10.71	5.8
34.64	16.1		34.64	16.1
8.98	4.8		8.98	4.8
20.19	10.42		20.19	10.42
14.46	6.48		14.46	6.48
8.25	3.82		8.25	3.82
15.47	6.88		15.47	6.88
24.27	11.65		24.27	11.65
9.95	5.83		9.95	5.83
11.32	7.01		11.32	7.01
19.35	8.04		19.35	8.04
11.68	5.55		11.68	5.55
10.34	4.67		10.34	4.67
8.78	6.1		8.78	6.1
21.71	18.99		21.71	18.99
5.14	3.08		5.14	3.08
4.58	3.15		4.58	3.15
26.32	19.61		26.32	19.61
2.81	0.59		2.81	0.59
16.79	3.01		16.79	3.01
12.34	4.43		12.34	4.43
23.44	20.05		23.44	20.05
6.66	4.27		6.66	4.27
6.26	3.12		6.26	3.12
9.9	7.85		9.9	7.85
7.9	2.73		7.9	2.73
6.28	3.67		6.28	3.67
1.94	1.06		1.94	1.06
45.55	39.3		45.55	39.3
71.54	66.3		71.54	66.3
10.42	5.48		10.42	5.48
9.51	5.78		9.51	5.78
9.96	4.63		9.96	4.63
7.81	4.71		7.81	4.71
10.91	6.17		10.91	6.17
5.99	4.72		5.99	4.72
3.88	2.84		3.88	2.84
9.55	6.25		9.55	6.25
6.57	4.87		6.57	4.87
8.93	4.74		8.93	4.74
5.78	4.14		5.78	4.14
9.65	6.72		9.65	6.72
15.26	8.95		15.26	8.95
12.05	9.49		12.05	9.49
9.34	6.08		9.34	6.08
6.4	3.84		6.4	3.84
9.92	5.13		9.92	5.13
15.7	10.39		15.7	10.39
12.32	6.31		12.32	6.31
39.2	21.46		39.2	21.46
11.34	6.59		11.34	6.59
5.82	3.96		5.82	3.96
9.61	6.81		9.61	6.81
10.32	6.46		10.32	6.46
9.88	5.97		9.88	5.97
6.6	2.85		6.6	2.85
23.96	12.68		23.96	12.68
9.64	6.32		9.64	6.32
5.46	-0.78		5.46	0
5.75	2.33		5.75	2.33
9.32	3.81		9.32	3.81
7	3.82		7	3.82
11.06	4.03		11.06	4.03
10.13	4.85		10.13	4.85
6.6	3.78		6.6	3.78
32.96	29.41		32.96	29.41
11.26	5.89		11.26	5.89
8.46	4.68		8.46	4.68
11.66	7.31		11.66	7.31
10.44	6.8		10.44	6.8
5.96	3.32		5.96	3.32
15.05	10		15.05	10
5.28	2.98		5.28	2.98
9.64	5.65		9.64	5.65
10.1	5.87		10.1	5.87
8.41	4.96		8.41	4.96
13.14	11.53		13.14	11.53
4.31	3.48		4.31	3.48
6.89	4.43		6.89	4.43
8.71	4.28		8.71	4.28
7.86	5.65		7.86	5.65
19.36	12.85		19.36	12.85
20.31	14.9		20.31	14.9
24.63	18.02		24.63	18.02
54.65	49.88		54.65	49.88
9.74	7.34		9.74	7.34
9.03	6.83		9.03	6.83
7.1	5.23		7.1	5.23
23.96	15.66		23.96	15.66
18.38	11.94		18.38	11.94
13.81	7.77		13.81	7.77
12.08	8.81		12.08	8.81
16.6	11.26		16.6	11.26
29.1	18.36		29.1	18.36
16.24	10.77		16.24	10.77
11.82	7.85		11.82	7.85
9.17	6.35		9.17	6.35
16.24	12.71		16.24	12.71
10.17	7.5		10.17	7.5
68.86	43.62		68.86	43.62
10.56	7.35		10.56	7.35
139.37	58.6		139.37	58.6
9.47	6.42		9.47	6.42
16.81	12.35		16.81	12.35
42.16	27.7		42.16	27.7
15.77	10.14		15.77	10.14
7.87	6.6		7.87	6.6
19.59	15.7		19.59	15.7
12.77	9.86		12.77	9.86
14.86	9.5		14.86	9.5
14.75	9.2		14.75	9.2
13.73	10.49		13.73	10.49
10.46	8.02		10.46	8.02
11.98	8.36		11.98	8.36
15.99	14.58		15.99	14.58
8.15	6.32		8.15	6.32
13.27	11.09		13.27	11.09
21.43	18.9		21.43	18.9
12.67	10.52		12.67	10.52
9.72	6.96		9.72	6.96
12.26	9.53		12.26	9.53
10.37	9.56		10.37	9.56
25.08	21.9		25.08	21.9
8.43	5.83		8.43	5.83
12.82	9.61		12.82	9.61
21.15	16.08		21.15	16.08
9.4	7.67		9.4	7.67
6.04	5.07		6.04	5.07
5.78	5.42		5.78	5.42
11.73	8.43		11.73	8.43
8.32	6.04		8.32	6.04
12.04	9.99		12.04	9.99
9.35	7.78		9.35	7.78
4.07	4.17		4.07	4.17
17.84	13.57		17.84	13.57
14.89	8.31		14.89	8.31
4.28	3.67		4.28	3.67
11.83	9.65		11.83	9.65
23.51	19.88		23.51	19.88
17.03	12.8		17.03	12.8
64.27	43.28		64.27	43.28
14.59	12.24		14.59	12.24
16.65	12.66		16.65	12.66
9.78	7.19		9.78	7.19
13.05	7.9		13.05	7.9
18.38	12.79		18.38	12.79
29.23	25.96		29.23	25.96
12.73	10.42		12.73	10.42
11.19	9.28		11.19	9.28
13.82	10.91		13.82	10.91
17.09	15.06		17.09	15.06
17.16	13.89		17.16	13.89
10.66	7.23		10.66	7.23
14.13	9.38		14.13	9.38
24.62	19.45		24.62	19.45
14.09	9.15		14.09	9.15
12.99	8.46		12.99	8.46
14.17	8.52		14.17	8.52
19.62	13.77		19.62	13.77
6.19	5.12		6.19	5.12
11.1	6.88		11.1	6.88
3.95	3.41		3.95	3.41
32.17	27.9		32.17	27.9
6.8	5.59		6.8	5.59
7.2	5.68		7.2	5.68
14.61	9.71		14.61	9.71
10.51	7.36		10.51	7.36
11.87	9.37		11.87	9.37
11.36	7.72		11.36	7.72
27.74	17.99		27.74	17.99
8.76	5.42		8.76	5.42
13.73	5.78		13.73	5.78
9.85	2.25		9.85	2.25
13.69	8		13.69	8
12.76	8.41		12.76	8.41
11.32	7.38		11.32	7.38
12.18	7.99		12.18	7.99
11.67	8.09		11.67	8.09
7.72	4.48		7.72	4.48
23.08	16.8		23.08	16.8
19.56	13.46		19.56	13.46
8.78	5.85		8.78	5.85
9.76	6.83		9.76	6.83
19.56	11.85		19.56	11.85
7.71	5.52		7.71	5.52
5.85	3.99		5.85	3.99
17.1	11.23		17.1	11.23
11.38	7.48		11.38	7.48
7.53	5.57		7.53	5.57
20.67	17.68		20.67	17.68
8.87	6.65		8.87	6.65
9.52	5.83		9.52	5.83
10.59	7.83		10.59	7.83
10.87	7.34		10.87	7.34
13.19	7.37		13.19	7.37
20.61	15.54		20.61	15.54
23.33	20.78		23.33	20.78
12.95	10.54		12.95	10.54
21.83	13.49		21.83	13.49
4.69	3.23		4.69	3.23
26.15	16.86		26.15	16.86
7.22	5.97		7.22	5.97
16.8	9.9		16.8	9.9
13	7.69		13	7.69
7.55	5.34		7.55	5.34
42.35	35.92		42.35	35.92
5.39	4.14		5.39	4.14
12.86	8.5		12.86	8.5
7.06	5		7.06	5
57.18	32.78		57.18	32.78
7.54	5.59		7.54	5.59
5.5	4.07		5.5	4.07
6.37	5.51		6.37	5.51
6.28	3.64		6.28	3.64
15.29	13.43		15.29	13.43
13.6	8.91		13.6	8.91
10.72	8.2		10.72	8.2
8.72	6.65		8.72	6.65
5.24	3.95		5.24	3.95
7.94	4.92		7.94	4.92
8.28	6.79		8.28	6.79
14.86	11.35		14.86	11.35
14.2	7.45		14.2	7.45
10.52	7.2		10.52	7.2
9.71	6.79		9.71	6.79
6.89	6.01		6.89	6.01
14.84	8.9		14.84	8.9
7.27	3.77		7.27	3.77
14.62	7.63		14.62	7.63
11.03	6.15		11.03	6.15
7.19	5.51		7.19	5.51
17.27	1.98		17.27	1.98
15.05	8.27		15.05	8.27
6.16	4.99		6.16	4.99
8.86	5.9		8.86	5.9
9.75	1.59		9.75	1.59
14.85	11.39		14.85	11.39
10.22	8.59		10.22	8.59
7.79	5.99		7.79	5.99
12.42	6.34		12.42	6.34
9.6	7.42		9.6	7.42
9.29	4.35		9.29	4.35
33.24	27.16		33.24	27.16
13.39	11.08		13.39	11.08
82.37	30.89		82.37	30.89
9.51	3.53		9.51	3.53
10.48	6.02		10.48	6.02
7.3	4.13		7.3	4.13
17.36	10.62		17.36	10.62
23.76	19.02		23.76	19.02
-1.23	0		0	0
-1.23	0		0	0
-1.23	0		0	0
-1.23	0		0	0
-1.23	0		0	0
-1.23	0		0	0
-1.23	0		0	0
-1.23	0		0	0
-1.23	0		0	0
-1.23	0		0	0
-1.23	0		0	0
-1.23	0		0	0
-1.23	0		0	0
-1.23	0		0	0
7.89	5.24		7.89	5.24
33.86	25.41		33.86	25.41
8.38	5.2		8.38	5.2
11.46	8.35		11.46	8.35
15.7	13.15		15.7	13.15
42.25	34.5		42.25	34.5
10.97	6.47		10.97	6.47
5.89	4.52		5.89	4.52
15.79	9.02		15.79	9.02
17.22	8.84		17.22	8.84
14.5	10.06		14.5	10.06
20.39	14.76		20.39	14.76
14.1	8.33		14.1	8.33
10.08	6.51		10.08	6.51
4.73	3.66		4.73	3.66
27.06	21.47		27.06	21.47
15.33	11.16		15.33	11.16
14.73	12.04		14.73	12.04
10.82	8.47		10.82	8.47
37.43	34.81		37.43	34.81
7.84	2.39		7.84	2.39
14.36	7.52		14.36	7.52
11.84	6.46		11.84	6.46
11.8	4.76		11.8	4.76
7.1	4.65		7.1	4.65
8.68	5.99		8.68	5.99
5.47	4.07		5.47	4.07
5.8	4.09		5.8	4.09
11.19	5.89		11.19	5.89
10.92	8.15		10.92	8.15
5.65	4.14		5.65	4.14
5.47	4.75		5.47	4.75
10.21	6.85		10.21	6.85
9.85	6.73		9.85	6.73
10.65	6.96		10.65	6.96
10.7	7.72		10.7	7.72
7.21	5.09		7.21	5.09
6.23	4.35		6.23	4.35
9.04	6.31		9.04	6.31
12.39	8.12		12.39	8.12
23.2	20.95		23.2	20.95
9.67	6.25		9.67	6.25
24.27	15.17		24.27	15.17
16.74	10.99		16.74	10.99
13.98	10.15		13.98	10.15
37.24	26.16		37.24	26.16
9	6.93		9	6.93
9.59	7.11		9.59	7.11
5.65	3.78		5.65	3.78
16.2	8.64		16.2	8.64
7.08	5.14		7.08	5.14
12.51	7.89		12.51	7.89
8.96	6.96		8.96	6.96
3.69	3.07		3.69	3.07
6.36	5.21		6.36	5.21
9.88	6.77		9.88	6.77
7.34	1.35		7.34	1.35
9.25	6.56		9.25	6.56
7.1	5.29		7.1	5.29
5.56	3.81		5.56	3.81
7.66	5.94		7.66	5.94
8.33	5.94		8.33	5.94
5.24	3.26		5.24	3.26
9.6	6.43		9.6	6.43
6.83	2.78		6.83	2.78
5.04	3.39		5.04	3.39
5	2.96		5	2.96
5.87	-0.08		5.87	0
12.26	7.05		12.26	7.05
6.07	1.64		6.07	1.64
11.62	8.27		11.62	8.27
7.19	5.42		7.19	5.42
5.85	4.55		5.85	4.55
4.54	3.42		4.54	3.42
20.1	16.09		20.1	16.09
4.41	3.25		4.41	3.25
8.08	6.2		8.08	6.2
9.13	6.06		9.13	6.06
8.53	6.54		8.53	6.54
9.42	6.13		9.42	6.13
7.28	5.38		7.28	5.38
12.19	9.04		12.19	9.04
13.63	9.71		13.63	9.71
5.91	3.83		5.91	3.83
47.92	30.14		47.92	30.14
13.8	12.62		13.8	12.62
12.41	9.52		12.41	9.52
5.53	3.04		5.53	3.04
15.23	11.2		15.23	11.2
5.03	3.52		5.03	3.52
9.65	5.52		9.65	5.52
8.89	4.88		8.89	4.88
10.41	7.9		10.41	7.9
22.51	11.36		22.51	11.36
6.36	4.71		6.36	4.71
8.79	5.97		8.79	5.97
7.06	5.71		7.06	5.71
5.46	4.51		5.46	4.51
6.15	4.97		6.15	4.97
121.39	116.44		121.39	116.44
8.49	7.81		8.49	7.81
2.94	2.22		2.94	2.22
8.75	7.2		8.75	7.2
4.61	3.37		4.61	3.37
6.52	3.34		6.52	3.34
11.39	9.7		11.39	9.7
9.19	7.02		9.19	7.02
5.48	5.18		5.48	5.18
11.63	8.21		11.63	8.21
5.58	3.89		5.58	3.89
6.65	5.24		6.65	5.24
12.76	8.87		12.76	8.87
15.3	11.19		15.3	11.19
10.32	7.79		10.32	7.79
16.25	12.83		16.25	12.83
17.66	14.92		17.66	14.92
10.02	5.58		10.02	5.58
9.02	6.08		9.02	6.08
14.44	9.72		14.44	9.72
6.41	-5.43		6.41	0
7.86	4.75		7.86	4.75
10.47	7.33		10.47	7.33
14.14	12.33		14.14	12.33
9.52	8.05		9.52	8.05
19.92	14.48		19.92	14.48
13.49	9.38		13.49	9.38
28.42	25.03		28.42	25.03
13.14	9.61		13.14	9.61
7.33	5.11		7.33	5.11
-1.23	0		0	0
4.06	2.79		4.06	2.79
9.83	6.03		9.83	6.03
7.5	3.1		7.5	3.1
14.21	9.44		14.21	9.44
5.23	3.42		5.23	3.42
5.13	4.04		5.13	4.04
7.14	5.51		7.14	5.51
20.5	12.5		20.5	12.5
9.54	6.2		9.54	6.2
18.85	16.94		18.85	16.94
5.48	3.33		5.48	3.33
5.01	1.72		5.01	1.72
9.25	6.21		9.25	6.21
4.83	3.5		4.83	3.5
7.08	5.46		7.08	5.46
12.79	9.18		12.79	9.18
4.49	2.74		4.49	2.74
8.06	4.49		8.06	4.49
11.96	8.24		11.96	8.24
5.13	4.1		5.13	4.1
9.1	6.51		9.1	6.51
14.56	10.82		14.56	10.82
8.79	7.3		8.79	7.3
9.65	7.83		9.65	7.83
12.06	8.42		12.06	8.42
13.82	9.43		13.82	9.43
26.62	16.64		26.62	16.64
16.64	13.12		16.64	13.12
14.08	9.87		14.08	9.87
16.38	11.71		16.38	11.71
79.93	74.61		79.93	74.61
7.88	5.17		7.88	5.17
17.21	11.62		17.21	11.62
11.74	8.74		11.74	8.74
12	9.11		12	9.11
11.13	9.26		11.13	9.26
5.36	4.21		5.36	4.21
11.26	8.08		11.26	8.08
5.45	3.96		5.45	3.96
13.73	10.16		13.73	10.16
7.45	6.02		7.45	6.02
7.36	5.93		7.36	5.93
8.88	7.96		8.88	7.96
19.79	18.5		19.79	18.5
8.32	5.74		8.32	5.74
7.28	4.52		7.28	4.52
9.22	3.97		9.22	3.97
12.64	10.46		12.64	10.46
15.03	12.96		15.03	12.96
7.02	6.22		7.02	6.22
6.71	5.16		6.71	5.16
11.39	8.87		11.39	8.87
16.45	11.95		16.45	11.95
6.39	4.22		6.39	4.22
28.26	15.69		28.26	15.69
52.44	23.46		52.44	23.46
7.91	6.03		7.91	6.03
11.7	8.2		11.7	8.2
13.61	10.56		13.61	10.56
19.66	8.43		19.66	8.43
10.71	1.76		10.71	1.76
5.75	0.69		5.75	0.69
15.92	6.53		15.92	6.53
21.67	12.83		21.67	12.83
23.44	9.76		23.44	9.76
9.93	5.15		9.93	5.15
8.75	3.63		8.75	3.63
8.37	2.93		8.37	2.93
4.63	2.62		4.63	2.62
16.85	10.5		16.85	10.5
5.04	2.54		5.04	2.54
7.59	4.97		7.59	4.97
19.68	16.19		19.68	16.19
6.52	2.99		6.52	2.99
18.62	11.03		18.62	11.03
13.74	9.54		13.74	9.54
6.56	5.43		6.56	5.43
16.73	8.65		16.73	8.65
6.77	4.75		6.77	4.75
6.68	5.23		6.68	5.23
11.73	6.72		11.73	6.72
7.93	4.27		7.93	4.27
33.94	31.46		33.94	31.46
7.88	4.69		7.88	4.69
12.96	7.17		12.96	7.17
8.36	6.18		8.36	6.18
21.7	14.22		21.7	14.22
7.79	3.79		7.79	3.79
9.17	5.7		9.17	5.7
17.38	13.27		17.38	13.27
8.98	5.34		8.98	5.34
13.39	9.45		13.39	9.45
17	13.77		17	13.77
11.16	8.61		11.16	8.61
15.57	11.6		15.57	11.6
9.82	6.2		9.82	6.2
8.15	5.79		8.15	5.79
34.11	27.65		34.11	27.65
10.92	7.5		10.92	7.5
6.76	5.24		6.76	5.24
6.91	4.51		6.91	4.51
6.48	3.21		6.48	3.21
30.34	23.32		30.34	23.32
9.53	7.59		9.53	7.59
16.98	14.06		16.98	14.06
7.34	5.01		7.34	5.01
6.48	4.26		6.48	4.26
7.53	5.17		7.53	5.17
29.91	23.14		29.91	23.14
7.89	5.15		7.89	5.15
10.63	8.12		10.63	8.12
14.34	11.02		14.34	11.02
11.12	6.28		11.12	6.28
31.31	23.23		31.31	23.23
10.48	7.4		10.48	7.4
12.69	9.13		12.69	9.13
10.18	7.52		10.18	7.52
16.7	12.54		16.7	12.54
8.27	6.29		8.27	6.29
16.55	12.81		16.55	12.81
11.57	8.25		11.57	8.25
10.97	7.32		10.97	7.32
7.67	4.48		7.67	4.48
14.91	11.44		14.91	11.44
58.32	54.79		58.32	54.79
12.52	10.64		12.52	10.64
29.81	19.19		29.81	19.19
17.23	13.52		17.23	13.52
46.76	42.86		46.76	42.86
14.35	10.95		14.35	10.95
6.83	5.89		6.83	5.89
8.37	6.25		8.37	6.25
30.78	29.72		30.78	29.72
10.99	8.42		10.99	8.42
12.86	9.5		12.86	9.5
53.83	51.71		53.83	51.71
12.18	9.01		12.18	9.01
9.37	7.35		9.37	7.35
10.01	8.56		10.01	8.56
25.65	19.56		25.65	19.56
10.01	7.7		10.01	7.7
9.56	7.82		9.56	7.82
10.16	7.81		10.16	7.81
10.09	7.78		10.09	7.78
5.12	4.45		5.12	4.45
13.32	9.99		13.32	9.99
11.89	9.45		11.89	9.45
16.06	11.92		16.06	11.92
9.07	7.53		9.07	7.53
10.76	7.77		10.76	7.77
21.51	19.54		21.51	19.54
20.38	13.68		20.38	13.68
13.28	8.53		13.28	8.53
14.93	11.06		14.93	11.06
13.56	10.21		13.56	10.21
14.17	10.21		14.17	10.21
8.96	6.77		8.96	6.77
12.39	8.46		12.39	8.46
9.56	7.56		9.56	7.56
31.72	19.43		31.72	19.43
10.29	6.94		10.29	6.94
10.53	7.95		10.53	7.95
12.67	8.96		12.67	8.96
8.27	6.48		8.27	6.48
12.79	10.29		12.79	10.29
11.25	8.19		11.25	8.19
9.53	7.81		9.53	7.81
11.08	7.29		11.08	7.29
25.22	19.28		25.22	19.28
14.07	9.97		14.07	9.97
11.74	6.51		11.74	6.51
12.39	9.73		12.39	9.73
13.83	10.07		13.83	10.07
13.05	9.55		13.05	9.55
12.56	10.11		12.56	10.11
14.11	10.8		14.11	10.8
54.35	50.88		54.35	50.88
9.81	7.88		9.81	7.88
47.18	37.52		47.18	37.52
37.47	25.85		37.47	25.85
22.1	16.67		22.1	16.67
12.58	9.13		12.58	9.13
12.68	9.28		12.68	9.28
31.01	21.4		31.01	21.4
17.15	13.4		17.15	13.4
22.2	16.77		22.2	16.77
20.08	15.61		20.08	15.61
25.36	21		25.36	21
38.98	27.27		38.98	27.27
29.18	20.69		29.18	20.69
13.71	10.68		13.71	10.68
18.66	14.8		18.66	14.8
23.85	18.17		23.85	18.17
36.17	32.41		36.17	32.41
42.87	30.49		42.87	30.49
25.75	18.92		25.75	18.92
13.47	-0.32		13.47	0
11.22	7.51		11.22	7.51
60.28	53.56		60.28	53.56
11.95	3.31		11.95	3.31
7.78	4.23		7.78	4.23
14.99	6.56		14.99	6.56
41.3	37.54		41.3	37.54
14.15	7.69		14.15	7.69
14.54	6.83		14.54	6.83
26.43	15.7		26.43	15.7
18.09	13.66		18.09	13.66
6.41	4.01		6.41	4.01
17.62	13.88		17.62	13.88
13.74	9.22		13.74	9.22
14.61	10.74		14.61	10.74
8.79	6.86		8.79	6.86
11.12	6.86		11.12	6.86
7.87	3.48		7.87	3.48
9.57	5.78		9.57	5.78
11.85	8.62		11.85	8.62
7.29	4.84		7.29	4.84
18.35	8.62		18.35	8.62
5.64	3.49		5.64	3.49
7.92	7.79		7.92	7.79
13.35	10.73		13.35	10.73
25.62	20.07		25.62	20.07
10.11	6.58		10.11	6.58
10.56	6.73		10.56	6.73
32.92	29.57		32.92	29.57
15.25	13.06		15.25	13.06
16.92	13.99		16.92	13.99
7.13	4.3		7.13	4.3
11.51	6.9		11.51	6.9
39.73	33.28		39.73	33.28
10.47	6.56		10.47	6.56
7.58	5.48		7.58	5.48
8.44	5.13		8.44	5.13
21.11	14.87		21.11	14.87
20.12	6.3		20.12	6.3
7.92	5.78		7.92	5.78
6.61	3.24		6.61	3.24
9.49	6.43		9.49	6.43
5.93	4.1		5.93	4.1
8.95	6.02		8.95	6.02
7.09	4		7.09	4
19.72	12.8		19.72	12.8
21.23	14.98		21.23	14.98
18.83	14.89		18.83	14.89
8.29	5.99		8.29	5.99
5.55	4.31		5.55	4.31
13.99	8.62		13.99	8.62
23.05	13.08		23.05	13.08
9.67	4.88		9.67	4.88
28.8	26.86		28.8	26.86
4.31	3		4.31	3
11.84	9.07		11.84	9.07
6.25	5.95		6.25	5.95
4.7	3.51		4.7	3.51
18.08	12.22		18.08	12.22
16.57	10.24		16.57	10.24
10.04	7.53		10.04	7.53
5.39	4.65		5.39	4.65
7.48	5.71		7.48	5.71
7.73	6.11		7.73	6.11
12.6	9.11		12.6	9.11
5.21	4.22		5.21	4.22
53.1	26.25		53.1	26.25
11.31	6.47		11.31	6.47
24.27	8.56		24.27	8.56
8.82	4.52		8.82	4.52
36.68	21.55		36.68	21.55
7.29	4.14		7.29	4.14
9.12	5.88		9.12	5.88
9.37	4.92		9.37	4.92
26.1	15.57		26.1	15.57
11.11	7.29		11.11	7.29
4.9	4.42		4.9	4.42
6.64	4.8		6.64	4.8
10.41	5.34		10.41	5.34
5.9	3.96		5.9	3.96
11.16	5.99		11.16	5.99
10.32	8.01		10.32	8.01
13.9	10.46		13.9	10.46
15.21	13.78		15.21	13.78
13.72	10.96		13.72	10.96
11	8.75		11	8.75
6.8	5.03		6.8	5.03
16.02	12.06		16.02	12.06
8.15	6.22		8.15	6.22
11.09	9.01		11.09	9.01
16.88	12.58		16.88	12.58
10.23	8.62		10.23	8.62
15.48	10.54		15.48	10.54
15.3	10.57		15.3	10.57
9.92	6.84		9.92	6.84
11.71	7.3		11.71	7.3
16.83	10.69		16.83	10.69
46.06	30.98		46.06	30.98
12.68	8.9		12.68	8.9
18.7	10.98		18.7	10.98
19.67	16		19.67	16
11.66	6.19		11.66	6.19
9.99	5.84		9.99	5.84
22.6	6.63		22.6	6.63
17.08	12.93		17.08	12.93
14.75	6.39		14.75	6.39
14.9	4.89		14.9	4.89
16.17	9.16		16.17	9.16
12.12	5.11		12.12	5.11
9.87	3.38		9.87	3.38
18.25	12.32		18.25	12.32
6.41	4.95		6.41	4.95
26.49	20.1		26.49	20.1
68.7	61.38		68.7	61.38
38.19	33.92		38.19	33.92
12.54	6.15		12.54	6.15
17.76	15		17.76	15
27.27	20.05		27.27	20.05
11.91	11.92		11.91	11.92
9.23	7.72		9.23	7.72
7.12	4.04		7.12	4.04
10.92	7.2		10.92	7.2
6.84	4.22		6.84	4.22
9.82	1.61		9.82	1.61
24.56	21.25		24.56	21.25
11.68	8.65		11.68	8.65
8.83	6.62		8.83	6.62
5.21	3.77		5.21	3.77
25.38	18.06		25.38	18.06
15.21	10.5		15.21	10.5
9.65	5.5		9.65	5.5
16.85	12.02		16.85	12.02
10.77	8.19		10.77	8.19
5.64	4.46		5.64	4.46
17.71	16.31		17.71	16.31
9.74	7.64		9.74	7.64
11.5	7.8		11.5	7.8
8.66	5.14		8.66	5.14
8.95	7.18		8.95	7.18
12.13	10.74		12.13	10.74
4.22	1.29		4.22	1.29
6.71	5.2		6.71	5.2
7.76	5.61		7.76	5.61
10.76	6.94		10.76	6.94
15.2	10.77		15.2	10.77
3.64	3.65		3.64	3.65
5.2	4.25		5.2	4.25
3.54	3.06		3.54	3.06
4.55	3.86		4.55	3.86
6.21	5.73		6.21	5.73
17.84	15.14		17.84	15.14
6.55	3.79		6.55	3.79
5.95	4.31		5.95	4.31
9.96	6.82		9.96	6.82
8.1	5.92		8.1	5.92
8.21	3.25		8.21	3.25
3.81	2.44		3.81	2.44
9.25	5.66		9.25	5.66
5.71	4.08		5.71	4.08
13.29	8.71		13.29	8.71
8.73	7.07		8.73	7.07
63.41	32.56		63.41	32.56
4.56	3.51		4.56	3.51
5.24	3.99		5.24	3.99
11.23	7.5		11.23	7.5
11.48	6.35		11.48	6.35
7.08	4.04		7.08	4.04
10.71	8.23		10.71	8.23
5.59	2.9		5.59	2.9
6.93	3.62		6.93	3.62
5.28	3.56		5.28	3.56
7.71	4.54		7.71	4.54
9.47	6.11		9.47	6.11
11.34	8.82		11.34	8.82
10.64	8.66		10.64	8.66
6.44	4.72		6.44	4.72
20.62	17.54		20.62	17.54
8.42	5.94		8.42	5.94
10.92	7.32		10.92	7.32
25.67	15.73		25.67	15.73
10.99	7.9		10.99	7.9
7.76	5.77		7.76	5.77
8.07	6.19		8.07	6.19
6.28	4.53		6.28	4.53
6.09	3.61		6.09	3.61
7.42	4.05		7.42	4.05
23.58	21.52		23.58	21.52
13.24	10.94		13.24	10.94
6.47	3.65		6.47	3.65
7.95	3.18		7.95	3.18
11.83	9.56		11.83	9.56
6.36	4.51		6.36	4.51
24.42	12.43		24.42	12.43
5.65	2.95		5.65	2.95
5.26	2.37		5.26	2.37
9.7	4.99		9.7	4.99
12.5	8.62		12.5	8.62
8.33	4.6		8.33	4.6
8.52	4.35		8.52	4.35
12.26	4.93		12.26	4.93
82.89	80.28		82.89	80.28
6.44	4.76		6.44	4.76
5.5	4.29		5.5	4.29
4.83	4.22		4.83	4.22
13.01	7.24		13.01	7.24
6.83	4.76		6.83	4.76
15.17	9.79		15.17	9.79
5.44	3.5		5.44	3.5
30.35	18.79		30.35	18.79
8.45	4.93		8.45	4.93
8.75	4.67		8.75	4.67
4.76	1.15		4.76	1.15
19.36	16.69		19.36	16.69
17.19	7.59		17.19	7.59
7.8	3.68		7.8	3.68
6.77	4.68		6.77	4.68
6.43	3.67		6.43	3.67
5.86	3.61		5.86	3.61
12.44	6.84		12.44	6.84
12.13	9.06		12.13	9.06
5.37	2.92		5.37	2.92
10.75	5		10.75	5
6.34	3.9		6.34	3.9
4.97	3.24		4.97	3.24
25.77	15.63		25.77	15.63
13.27	9.03		13.27	9.03
7.88	4.41		7.88	4.41
13.19	6.46		13.19	6.46
8.05	5.62		8.05	5.62
5.49	3.91		5.49	3.91
5.62	4.39		5.62	4.39
6.86	5.3		6.86	5.3
8.87	4.83		8.87	4.83
5.4	3.58		5.4	3.58
6.73	4.35		6.73	4.35
5.56	3.17		5.56	3.17
10.11	6.6		10.11	6.6
5.56	3.17		5.56	3.17
5.36	4.04		5.36	4.04
7.41	4.62		7.41	4.62
3.24	1.26		3.24	1.26
4.01	0.48		4.01	0.48
4.86	3.25		4.86	3.25
2.36	2.21		2.36	2.21
4.82	3.41		4.82	3.41
8.56	5.43		8.56	5.43
5.48	4.53		5.48	4.53
10.61	8.97		10.61	8.97
11.26	7.15		11.26	7.15
14.62	9.37		14.62	9.37
12.59	6.95		12.59	6.95
17.94	12.12		17.94	12.12
11.15	8.01		11.15	8.01
67.34	62.8		67.34	62.8
12.82	8.75		12.82	8.75
13.13	7.16		13.13	7.16
7.87	5.86		7.87	5.86
10.7	7.29		10.7	7.29
10.3	6.48		10.3	6.48
8.37	6.23		8.37	6.23
12.41	8.77		12.41	8.77
8.59	5.08		8.59	5.08
12.46	8.07		12.46	8.07
15.02	10.9		15.02	10.9
10.56	7.67		10.56	7.67
30.26	26.97		30.26	26.97
10.37	7.6		10.37	7.6
8.04	5.34		8.04	5.34
10.21	6.68		10.21	6.68
7.53	3.71		7.53	3.71
7.96	4.6		7.96	4.6
12.58	8.38		12.58	8.38
7.19	5.25		7.19	5.25
7.19	4.78		7.19	4.78
4.55	3.67		4.55	3.67
11.99	7.88		11.99	7.88
12.96	9.11		12.96	9.11
12	8.7		12	8.7
16.54	12.47		16.54	12.47
14.32	10.63		14.32	10.63
16.68	15.57		16.68	15.57
13.91	12.56		13.91	12.56
6.46	4.83		6.46	4.83
8.16	5.61		8.16	5.61
23.78	14.96		23.78	14.96
[truncated: 719 more rows]

## Sheet: EPIC 2 Neu5Gca2–6Lacb-HSA
EPIC 2: Anti-Neu5Gc IgG(ug/ml) quantified by ELISA using Neu5Gca2–6Lacb-human serum albumin (HSA) as the target antigen (N=2712)
			Negative values zeroed
Anti Neu5Gca2–6Lacb-HSA	Anti Neu5Gca2–6Lacb-HSA minus HSA		Anti Neu5Gca2–6Lacb-HSA	Anti Neu5Gca2–6Lacb-HSA minus HSA
14.11	3.95		14.11	3.95
13.33	2.3		13.33	2.3
15.15	3.42		15.15	3.42
14.1	3.85		14.1	3.85
13.37	2.47		13.37	2.47
13.78	2.06		13.78	2.06
15.45	3.76		15.45	3.76
14.23	3.22		14.23	3.22
14.06	1.47		14.06	1.47
14	3.66		14	3.66
14.3	3.12		14.3	3.12
12.69	3.66		12.69	3.66
12.73	5.17		12.73	5.17
12.23	3.33		12.23	3.33
11.64	1.78		11.64	1.78
11.05	1.21		11.05	1.21
14.38	4.5		14.38	4.5
15.32	5.9		15.32	5.9
12.37	3.17		12.37	3.17
15.95	6.6		15.95	6.6
12.23	2.54		12.23	2.54
12.44	2.52		12.44	2.52
11.29	1.19		11.29	1.19
12.21	1.83		12.21	1.83
10.41	-0.01		10.41	0
11.74	3.6		11.74	3.6
12.55	3.1		12.55	3.1
11.73	3.47		11.73	3.47
11.38	1.85		11.38	1.85
11.9	2.37		11.9	2.37
13.03	3.83		13.03	3.83
13.37	3.71		13.37	3.71
12.61	3.54		12.61	3.54
12.84	2.3		12.84	2.3
12.21	0.84		12.21	0.84
13.35	4.7		13.35	4.7
12.38	4.65		12.38	4.65
12.28	4.2		12.28	4.2
13.24	3.8		13.24	3.8
9.9	2.78		9.9	2.78
10.88	1.55		10.88	1.55
10.69	2		10.69	2
11.27	2.92		11.27	2.92
12.07	3.72		12.07	3.72
10.61	1.63		10.61	1.63
10.63	2.25		10.63	2.25
10.49	2.26		10.49	2.26
9.72	3.3		9.72	3.3
9.15	3.04		9.15	3.04
7.8	1.4		7.8	1.4
8.95	2.13		8.95	2.13
8.94	2.97		8.94	2.97
8.76	1.83		8.76	1.83
9.23	1.89		9.23	1.89
9.09	2.11		9.09	2.11
9.51	2.35		9.51	2.35
9.3	2.29		9.3	2.29
9.63	1.25		9.63	1.25
10.27	1.23		10.27	1.23
11.46	3.04		11.46	3.04
10.37	2.62		10.37	2.62
8.98	1.45		8.98	1.45
10.68	2.44		10.68	2.44
11.33	4.63		11.33	4.63
8.95	1.26		8.95	1.26
10.67	2.63		10.67	2.63
12.07	3.94		12.07	3.94
11.03	3.16		11.03	3.16
9.7	1.45		9.7	1.45
10.41	3.06		10.41	3.06
12.19	4.11		12.19	4.11
11.93	3.05		11.93	3.05
12.25	4.14		12.25	4.14
11.72	2.65		11.72	2.65
13.48	2.8		13.48	2.8
11.46	1.55		11.46	1.55
11.44	1.31		11.44	1.31
12.76	3.2		12.76	3.2
12.57	1.69		12.57	1.69
13.59	1.53		13.59	1.53
13.57	3.9		13.57	3.9
12.83	2.82		12.83	2.82
13.69	3.23		13.69	3.23
13.56	3.7		13.56	3.7
11.86	3.06		11.86	3.06
11.42	3.2		11.42	3.2
12.24	2.03		12.24	2.03
9.92	1.32		9.92	1.32
12.1	3.81		12.1	3.81
11.99	1.97		11.99	1.97
11.27	1.37		11.27	1.37
13.22	3.59		13.22	3.59
11.84	2.05		11.84	2.05
10.56	1.79		10.56	1.79
12.51	2.67		12.51	2.67
13.13	3.35		13.13	3.35
11.97	2.86		11.97	2.86
12.43	2.41		12.43	2.41
11.55	-0.38		11.55	0
11.75	2.5		11.75	2.5
11.21	0.85		11.21	0.85
11.58	1.42		11.58	1.42
13.67	3.72		13.67	3.72
12.22	1.58		12.22	1.58
12.42	1.55		12.42	1.55
13.19	3.28		13.19	3.28
11.72	1.69		11.72	1.69
10.13	1.74		10.13	1.74
9.97	1.91		9.97	1.91
9.15	0.33		9.15	0.33
9.68	-0.19		9.68	0
10.29	2.33		10.29	2.33
9.9	0.56		9.9	0.56
10.07	1.2		10.07	1.2
11.11	1.61		11.11	1.61
9.14	0.82		9.14	0.82
11.5	2.75		11.5	2.75
10.71	4.26		10.71	4.26
14.22	4.32		14.22	4.32
12.66	2.61		12.66	2.61
11.61	3.45		11.61	3.45
11.67	3.28		11.67	3.28
11.2	2.86		11.2	2.86
11.75	3.13		11.75	3.13
11.9	2.35		11.9	2.35
11.91	2.26		11.91	2.26
11.1	3.39		11.1	3.39
12.51	3.74		12.51	3.74
11.87	1.9		11.87	1.9
13.04	2.46		13.04	2.46
11.97	2.48		11.97	2.48
10.51	1.05		10.51	1.05
9.22	2.63		9.22	2.63
7.95	0.51		7.95	0.51
9.32	1.52		9.32	1.52
8.59	1.56		8.59	1.56
8.24	0.61		8.24	0.61
8.77	1.8		8.77	1.8
8.55	1.53		8.55	1.53
10.12	3.08		10.12	3.08
8.54	0.65		8.54	0.65
10.3	2.49		10.3	2.49
10.02	0.86		10.02	0.86
15.28	4.36		15.28	4.36
11.48	0.12		11.48	0.12
13.1	1.18		13.1	1.18
15.1	2.78		15.1	2.78
11.79	0.65		11.79	0.65
11.62	-0.1		11.62	0
12.71	1.44		12.71	1.44
12.89	0.58		12.89	0.58
12.54	0.83		12.54	0.83
13.1	0.81		13.1	0.81
11.98	0.93		11.98	0.93
10.7	-0.45		10.7	0
11.19	0.86		11.19	0.86
10.9	1.33		10.9	1.33
11.83	1.91		11.83	1.91
11.12	2.53		11.12	2.53
10.42	1.56		10.42	1.56
11.13	0.24		11.13	0.24
11.72	2.3		11.72	2.3
11.73	3.01		11.73	3.01
14.6	4.74		14.6	4.74
13.34	0.84		13.34	0.84
13.33	4.35		13.33	4.35
13.54	1.85		13.54	1.85
13.21	3.37		13.21	3.37
12.67	1.44		12.67	1.44
11.58	1.02		11.58	1.02
12.33	0.29		12.33	0.29
11.97	1.16		11.97	1.16
15.8	4.11		15.8	4.11
14.42	3.41		14.42	3.41
11.38	-2.74		11.38	0
13.83	-2.31		13.83	0
12.06	1.07		12.06	1.07
14.41	1.77		14.41	1.77
14.5	2.83		14.5	2.83
12.47	3.42		12.47	3.42
16.39	3.33		16.39	3.33
10.99	2.24		10.99	2.24
13.05	3.87		13.05	3.87
13.15	5.25		13.15	5.25
13.16	3.43		13.16	3.43
12.45	2.58		12.45	2.58
13.17	4.51		13.17	4.51
12.57	3.81		12.57	3.81
12.34	2.91		12.34	2.91
15.11	4.63		15.11	4.63
13.02	1.63		13.02	1.63
18.69	5.01		18.69	5.01
18.8	2.35		18.8	2.35
18.44	4.63		18.44	4.63
19.98	6.32		19.98	6.32
22.01	8.68		22.01	8.68
19.99	5.76		19.99	5.76
19.66	4.9		19.66	4.9
19.14	4.9		19.14	4.9
19.66	6.36		19.66	6.36
18.28	2.16		18.28	2.16
19.4	3.65		19.4	3.65
20.6	4.33		20.6	4.33
13.12	3.48		13.12	3.48
13.16	4.74		13.16	4.74
11.64	2.02		11.64	2.02
13.08	2.87		13.08	2.87
14.43	4.09		14.43	4.09
12.44	1.67		12.44	1.67
12.19	2.53		12.19	2.53
13.15	4.14		13.15	4.14
13.07	3.06		13.07	3.06
13.89	2.61		13.89	2.61
13.28	2.89		13.28	2.89
12.87	2.15		12.87	2.15
12.13	2.64		12.13	2.64
13.92	4.42		13.92	4.42
10.45	-0.74		10.45	0
10.79	1.77		10.79	1.77
11.77	1.01		11.77	1.01
11.69	0.64		11.69	0.64
10.89	0.43		10.89	0.43
10.35	1.95		10.35	1.95
10.24	1.48		10.24	1.48
15.44	0.76		15.44	0.76
11.07	2.53		11.07	2.53
9.83	-1.45		9.83	0
10.52	3.05		10.52	3.05
12.71	4.76		12.71	4.76
9.45	2.35		9.45	2.35
9.49	2.73		9.49	2.73
9.23	2.5		9.23	2.5
10.01	2.06		10.01	2.06
10.54	2.94		10.54	2.94
10.77	4.09		10.77	4.09
11.01	4.01		11.01	4.01
8.65	-0.29		8.65	0
9.04	1.24		9.04	1.24
8.08	-0.05		8.08	0
14.8	3.08		14.8	3.08
14.24	4.31		14.24	4.31
14.27	3.74		14.27	3.74
16.81	5.26		16.81	5.26
16.87	6.71		16.87	6.71
15.64	3.08		15.64	3.08
15.78	4.24		15.78	4.24
16.5	5.11		16.5	5.11
15.15	4.64		15.15	4.64
14.33	2.87		14.33	2.87
16.67	3.02		16.67	3.02
18.57	5.62		18.57	5.62
12.54	3.45		12.54	3.45
13.72	3.37		13.72	3.37
11.53	2.11		11.53	2.11
12.03	3.53		12.03	3.53
12.83	4.29		12.83	4.29
16.14	6.02		16.14	6.02
13.05	3.59		13.05	3.59
13.75	4.9		13.75	4.9
13.98	2.33		13.98	2.33
13.09	2.74		13.09	2.74
13.49	4.06		13.49	4.06
15.09	4.01		15.09	4.01
15.06	3.41		15.06	3.41
13.65	3.01		13.65	3.01
13.58	3.19		13.58	3.19
14.9	4.48		14.9	4.48
14.86	4.65		14.86	4.65
14.26	1.7		14.26	1.7
13.89	3.45		13.89	3.45
14.67	4.84		14.67	4.84
13.56	3.47		13.56	3.47
14.08	2.4		14.08	2.4
14.06	3.45		14.06	3.45
15.75	2.78		15.75	2.78
9.21	0.93		9.21	0.93
10.22	3.08		10.22	3.08
10.27	1.99		10.27	1.99
10.55	2.57		10.55	2.57
10.43	2.96		10.43	2.96
10.4	2.38		10.4	2.38
16.09	6.6		16.09	6.6
12.79	5.32		12.79	5.32
10.77	2.72		10.77	2.72
10.64	2.15		10.64	2.15
10.77	2.6		10.77	2.6
15.47	0.67		15.47	0.67
10.16	2.5		10.16	2.5
9.06	2.43		9.06	2.43
9.37	2.48		9.37	2.48
9.49	2.01		9.49	2.01
9.99	2.57		9.99	2.57
9.33	1.62		9.33	1.62
9.63	2.11		9.63	2.11
9.41	2.72		9.41	2.72
9.88	2.91		9.88	2.91
10.82	3.03		10.82	3.03
9.78	1.52		9.78	1.52
9.59	2.45		9.59	2.45
22.57	6.1		22.57	6.1
20.18	4.85		20.18	4.85
20.42	5.33		20.42	5.33
21.09	6.53		21.09	6.53
21.84	7.37		21.84	7.37
21.47	5.86		21.47	5.86
22.18	5.79		22.18	5.79
21.22	5.48		21.22	5.48
22.87	7.46		22.87	7.46
21.16	2.57		21.16	2.57
23.82	5.5		23.82	5.5
25.15	5.38		25.15	5.38
17.36	2.89		17.36	2.89
14.31	2.07		14.31	2.07
15.7	2.91		15.7	2.91
14.27	0.26		14.27	0.26
11.19	-2.12		11.19	0
12.35	-1.09		12.35	0
13.67	0.63		13.67	0.63
12.65	-1.39		12.65	0
12.25	-0.69		12.25	0
15.27	1.82		15.27	1.82
14.82	1.8		14.82	1.8
13.58	-1.52		13.58	0
19.83	1.52		19.83	1.52
16.22	2.37		16.22	2.37
16.34	3.82		16.34	3.82
17.53	4.44		17.53	4.44
18.65	6.98		18.65	6.98
16.14	4.36		16.14	4.36
17.97	4.52		17.97	4.52
19.42	5.65		19.42	5.65
19.84	7.14		19.84	7.14
18.36	5.19		18.36	5.19
19.61	6.77		19.61	6.77
19.02	5.46		19.02	5.46
9.82	2.45		9.82	2.45
10.7	3.53		10.7	3.53
9.34	2.54		9.34	2.54
10.78	3.33		10.78	3.33
10.54	4.04		10.54	4.04
9.71	2.8		9.71	2.8
9.52	2.92		9.52	2.92
10.79	3.92		10.79	3.92
11.07	3.9		11.07	3.9
11.91	4.15		11.91	4.15
9.54	1.76		9.54	1.76
10.6	3.59		10.6	3.59
10.67	2.75		10.67	2.75
11.68	2.08		11.68	2.08
9.05	-0.52		9.05	0
10.42	1.79		10.42	1.79
10.29	3.51		10.29	3.51
11.28	1.52		11.28	1.52
11.1	2.99		11.1	2.99
10.71	2.83		10.71	2.83
11.56	3.79		11.56	3.79
10.68	1.19		10.68	1.19
11.54	2.66		11.54	2.66
11.87	0.86		11.87	0.86
9.82	0.05		9.82	0.05
12.87	2.59		12.87	2.59
9.35	-0.12		9.35	0
10.26	2.09		10.26	2.09
9.58	1.56		9.58	1.56
9.09	0.54		9.09	0.54
9.54	1.83		9.54	1.83
10.84	2.91		10.84	2.91
9.53	2.96		9.53	2.96
10.62	2.21		10.62	2.21
10.31	0.8		10.31	0.8
9.71	0.37		9.71	0.37
11.86	2.68		11.86	2.68
10.34	0.03		10.34	0.03
9.24	1.03		9.24	1.03
11.18	0.24		11.18	0.24
10.7	2.25		10.7	2.25
10.07	1.82		10.07	1.82
11.35	1.65		11.35	1.65
10.61	2.44		10.61	2.44
11.08	3.11		11.08	3.11
9.59	1.87		9.59	1.87
12.63	1.38		12.63	1.38
17.24	7.85		17.24	7.85
13.18	1.88		13.18	1.88
12.61	2.01		12.61	2.01
13.25	2.43		13.25	2.43
13.84	4.17		13.84	4.17
13.98	4.31		13.98	4.31
12.34	2.39		12.34	2.39
13.33	2.74		13.33	2.74
13.33	3.81		13.33	3.81
13.58	4.61		13.58	4.61
13.37	2.1		13.37	2.1
13.99	2.61		13.99	2.61
13.37	1.27		13.37	1.27
10.97	2.91		10.97	2.91
11.14	1.96		11.14	1.96
9.65	0.12		9.65	0.12
10.04	1.2		10.04	1.2
10.23	1.91		10.23	1.91
10.3	-0.12		10.3	0
11.61	1.82		11.61	1.82
11.74	2.26		11.74	2.26
10.92	0.86		10.92	0.86
10.83	1.18		10.83	1.18
10.36	-0.4		10.36	0
10.42	-0.8		10.42	0
14.9	4.03		14.9	4.03
13.19	1.52		13.19	1.52
13.27	2.6		13.27	2.6
13.08	1.03		13.08	1.03
13.06	2.36		13.06	2.36
10.9	0.04		10.9	0.04
12.05	2.25		12.05	2.25
14.08	3.87		14.08	3.87
13.72	2.65		13.72	2.65
14.61	1.48		14.61	1.48
14.68	2.92		14.68	2.92
14.18	-0.51		14.18	0
13.84	1.95		13.84	1.95
13.07	1.75		13.07	1.75
11.57	1.26		11.57	1.26
14.46	4.6		14.46	4.6
16.07	6.19		16.07	6.19
12.94	0.91		12.94	0.91
14.77	4.56		14.77	4.56
13.72	3.46		13.72	3.46
14.38	4.44		14.38	4.44
15.34	0.7		15.34	0.7
14.61	1.86		14.61	1.86
13.78	2.36		13.78	2.36
5.48	0.38		5.48	0.38
4.68	0.11		4.68	0.11
5.82	0.5		5.82	0.5
4.23	0.44		4.23	0.44
6.01	-1.14		6.01	0
4.79	0.66		4.79	0.66
6	0.28		6	0.28
4.68	0.38		4.68	0.38
5.03	0.85		5.03	0.85
5.54	1.53		5.54	1.53
6.58	2.41		6.58	2.41
5.67	1.41		5.67	1.41
6.21	0.57		6.21	0.57
4.66	0.22		4.66	0.22
6.42	0.5		6.42	0.5
4.42	0.74		4.42	0.74
5.84	0.23		5.84	0.23
4.52	0.33		4.52	0.33
5.3	-0.47		5.3	0
5.3	1.14		5.3	1.14
5.45	1.21		5.45	1.21
5.82	1.37		5.82	1.37
5.64	1.12		5.64	1.12
6.49	2.18		6.49	2.18
7.12	1.31		7.12	1.31
4.23	0.11		4.23	0.11
4.91	0.06		4.91	0.06
3.86	0.5		3.86	0.5
5.4	0.32		5.4	0.32
3.75	-0.59		3.75	0
5.49	-0.71		5.49	0
4.7	-0.14		4.7	0
6.26	2.32		6.26	2.32
5.22	1.43		5.22	1.43
5.62	1.22		5.62	1.22
6.13	-1.01		6.13	0
5.49	0.18		5.49	0.18
4.98	0.34		4.98	0.34
6.79	1.22		6.79	1.22
4.18	0.2		4.18	0.2
5.43	-0.25		5.43	0
4.69	0.25		4.69	0.25
5.39	-0.17		5.39	0
4.77	1		4.77	1
5.72	1.82		5.72	1.82
5.85	1.3		5.85	1.3
5.8	1.16		5.8	1.16
5.69	1.18		5.69	1.18
5.2	-0.33		5.2	0
4.68	0.26		4.68	0.26
5.28	0		5.28	0
6.3	1.02		6.3	1.02
7.07	1.63		7.07	1.63
4.58	0.03		4.58	0.03
5.66	-0.25		5.66	0
5.83	0.72		5.83	0.72
5.65	1.04		5.65	1.04
6.53	0.62		6.53	0.62
6.57	1.14		6.57	1.14
5.61	-3.99		5.61	0
6.67	1.02		6.67	1.02
4.04	-0.59		4.04	0
6.03	1.09		6.03	1.09
4.41	1.19		4.41	1.19
5.15	-0.05		5.15	0
4.27	0.49		4.27	0.49
5.15	0.35		5.15	0.35
4.97	0.66		4.97	0.66
5.46	0.8		5.46	0.8
5.83	1.11		5.83	1.11
5.75	1.75		5.75	1.75
5.25	1.05		5.25	1.05
5.82	0.62		5.82	0.62
5.4	1.25		5.4	1.25
5.62	-0.15		5.62	0
3.84	0.39		3.84	0.39
5.35	0.07		5.35	0.07
4.27	-0.77		4.27	0
5.46	-0.02		5.46	0
5.35	-0.3		5.35	0
5.86	1.24		5.86	1.24
6.09	1.68		6.09	1.68
7.17	2.83		7.17	2.83
6.32	0.54		6.32	0.54
5.51	-0.26		5.51	0
4.05	0.33		4.05	0.33
5.77	0.23		5.77	0.23
3.88	0.34		3.88	0.34
5.31	-0.36		5.31	0
4.63	0.07		4.63	0.07
5.38	0.17		5.38	0.17
4.44	0.69		4.44	0.69
5.58	1.55		5.58	1.55
5.69	1.59		5.69	1.59
6.01	1.36		6.01	1.36
5.29	1.14		5.29	1.14
8.17	0.6		8.17	0.6
7.53	-0.89		7.53	0
7.62	0.13		7.62	0.13
8.36	0.26		8.36	0.26
7.36	0.69		7.36	0.69
6.26	-0.1		6.26	0
8.36	0.14		8.36	0.14
7.75	-0.05		7.75	0
7.06	0.15		7.06	0.15
8.64	0.87		8.64	0.87
9.01	1.59		9.01	1.59
8.4	0.27		8.4	0.27
4.63	0.1		4.63	0.1
4.48	-0.83		4.48	0
5.03	-0.37		5.03	0
4.25	1.17		4.25	1.17
5.23	-0.08		5.23	0
4.41	0.89		4.41	0.89
5.05	0.01		5.05	0.01
4.41	-0.44		4.41	0
4.73	0.34		4.73	0.34
5.24	0.98		5.24	0.98
5.84	0.47		5.84	0.47
5.44	0.11		5.44	0.11
5.01	0.27		5.01	0.27
3.74	-0.98		3.74	0
4.86	0.17		4.86	0.17
3.55	0.26		3.55	0.26
5.13	0.14		5.13	0.14
5.02	1.29		5.02	1.29
4.93	-0.84		4.93	0
4.79	0.04		4.79	0.04
5.05	-1.16		5.05	0
9.32	4.92		9.32	4.92
5.96	1		5.96	1
5.91	1.4		5.91	1.4
5.25	0.79		5.25	0.79
5.74	0.16		5.74	0.16
5.22	0.25		5.22	0.25
3.52	0.34		3.52	0.34
4.72	-1.25		4.72	0
3.83	0.34		3.83	0.34
4.9	-0.07		4.9	0
3.78	0.13		3.78	0.13
4.93	0.67		4.93	0.67
9.91	5.53		9.91	5.53
6.01	1.16		6.01	1.16
4.92	0.79		4.92	0.79
5.03	0.25		5.03	0.25
3.54	-0.39		3.54	0
4.52	0.08		4.52	0.08
4.1	0.3		4.1	0.3
4.74	0.3		4.74	0.3
3.74	0.31		3.74	0.31
5.18	-0.1		5.18	0
5.02	0.07		5.02	0.07
5.1	0.97		5.1	0.97
5.73	1.96		5.73	1.96
5.36	0.37		5.36	0.37
5.23	0.88		5.23	0.88
6.68	1.44		6.68	1.44
5	0.27		5	0.27
5.07	-0.12		5.07	0
3.94	0.44		3.94	0.44
4.84	0.17		4.84	0.17
4.54	-0.94		4.54	0
4.19	-0.81		4.19	0
4.99	0.81		4.99	0.81
4.55	0.04		4.55	0.04
5.93	1.52		5.93	1.52
5.49	1.12		5.49	1.12
5.37	1.47		5.37	1.47
5.37	0.55		5.37	0.55
4.26	0.81		4.26	0.81
5.82	0.68		5.82	0.68
4.88	0.25		4.88	0.25
5.63	-0.18		5.63	0
4.51	0.3		4.51	0.3
5.12	-0.38		5.12	0
4.53	0.59		4.53	0.59
5.24	-0.22		5.24	0
4.58	-0.19		4.58	0
4.6	0.84		4.6	0.84
4.56	-2.6		4.56	0
3.83	-0.96		3.83	0
3.57	-0.31		3.57	0
6.58	2.02		6.58	2.02
3.14	0.35		3.14	0.35
3.86	-0.4		3.86	0
4.1	0.2		4.1	0.2
4.08	-0.02		4.08	0
4.73	1.07		4.73	1.07
3.9	0.51		3.9	0.51
4.66	1.09		4.66	1.09
4.23	0.45		4.23	0.45
4.6	0.11		4.6	0.11
3.98	-0.01		3.98	0
4.66	-1.11		4.66	0
4.49	-0.54		4.49	0
3.46	-0.15		3.46	0
4.58	-0.45		4.58	0
4.6	0.74		4.6	0.74
5.4	0.87		5.4	0.87
5.6	0.69		5.6	0.69
4.55	-0.18		4.55	0
4.94	0.61		4.94	0.61
5.49	1.12		5.49	1.12
5.87	0.04		5.87	0.04
6.3	0.84		6.3	0.84
5.68	-0.43		5.68	0
5.09	0.14		5.09	0.14
5.61	0.39		5.61	0.39
5	-0.2		5	0
5.23	0.01		5.23	0.01
5.86	1.03		5.86	1.03
6.03	0.4		6.03	0.4
6.19	-0.44		6.19	0
4.92	-1.1		4.92	0
5.58	-0.61		5.58	0
5.61	-0.01		5.61	0
7.89	0.84		7.89	0.84
5.1	0.19		5.1	0.19
6.62	-0.14		6.62	0
5.91	0.39		5.91	0.39
18.8	11.94		18.8	11.94
5.77	0.62		5.77	0.62
6.82	-0.14		6.82	0
6.56	0.57		6.56	0.57
7.35	2.2		7.35	2.2
7.12	2.02		7.12	2.02
7.34	1.91		7.34	1.91
23.94	3.2		23.94	3.2
6.45	0.84		6.45	0.84
4.6	0.88		4.6	0.88
5.57	-0.06		5.57	0
4.18	0.74		4.18	0.74
6.81	0.91		6.81	0.91
4.49	0.43		4.49	0.43
5.87	-0.49		5.87	0
5.01	0.68		5.01	0.68
5.18	1.46		5.18	1.46
5.15	1.49		5.15	1.49
6.66	1.92		6.66	1.92
5.65	1.67		5.65	1.67
5.54	0.34		5.54	0.34
3.89	-0.14		3.89	0
5.66	0.02		5.66	0.02
4.09	1.14		4.09	1.14
6.16	0.56		6.16	0.56
4.21	0.3		4.21	0.3
6.26	1.03		6.26	1.03
4.45	0.42		4.45	0.42
5.68	1.28		5.68	1.28
5.37	1.55		5.37	1.55
5.6	1.8		5.6	1.8
4.99	1.05		4.99	1.05
5.7	-0.13		5.7	0
4.18	0.28		4.18	0.28
5.26	-0.2		5.26	0
4.99	1.04		4.99	1.04
5.37	-0.13		5.37	0
4.34	0.2		4.34	0.2
5.88	-2.42		5.88	0
4.71	1.03		4.71	1.03
5.35	1.21		5.35	1.21
5.64	1.6		5.64	1.6
6.8	1.98		6.8	1.98
6.48	1.3		6.48	1.3
5	0.36		5	0.36
3.59	0.34		3.59	0.34
5.4	0.48		5.4	0.48
4.19	0.7		4.19	0.7
4.77	-0.61		4.77	0
4.35	0.06		4.35	0.06
5.58	0.4		5.58	0.4
4.29	0.87		4.29	0.87
4.88	0.72		4.88	0.72
4.8	0.2		4.8	0.2
5.8	1.61		5.8	1.61
5.17	1.64		5.17	1.64
6.4	1.2		6.4	1.2
4.27	0.33		4.27	0.33
5.76	-0.06		5.76	0
4.5	0.76		4.5	0.76
5.41	-0.12		5.41	0
4.98	0.55		4.98	0.55
5.58	-0.2		5.58	0
4.43	0.52		4.43	0.52
4.99	0.9		4.99	0.9
5.35	2.1		5.35	2.1
5.99	0.57		5.99	0.57
5.87	1.3		5.87	1.3
5.33	0.14		5.33	0.14
4.53	-1		4.53	0
6.02	-1.58		6.02	0
4.18	0.12		4.18	0.12
6.37	0.3		6.37	0.3
4.69	0.7		4.69	0.7
5.9	0.05		5.9	0.05
5.06	-0.18		5.06	0
5.56	0.7		5.56	0.7
6.14	1.96		6.14	1.96
5.28	1.02		5.28	1.02
6.21	1.51		6.21	1.51
6.01	-0.09		6.01	0
5.41	-0.94		5.41	0
6.46	-0.25		6.46	0
5.37	0.91		5.37	0.91
6.75	-0.22		6.75	0
4.79	0.29		4.79	0.29
6.53	-0.17		6.53	0
5.25	0		5.25	0
5.94	0.75		5.94	0.75
6.49	1.52		6.49	1.52
7.29	2.16		7.29	2.16
6.53	0.55		6.53	0.55
8.08	0.89		8.08	0.89
7.84	0.22		7.84	0.22
7.22	0.59		7.22	0.59
6.74	-0.28		6.74	0
8.72	0.36		8.72	0.36
7.08	0.39		7.08	0.39
7.3	-1.19		7.3	0
8.02	0.87		8.02	0.87
7.17	0.32		7.17	0.32
8.39	2.89		8.39	2.89
8.47	1.09		8.47	1.09
7.95	1.45		7.95	1.45
6.84	0.07		6.84	0.07
5.39	-0.1		5.39	0
6.48	-0.2		6.48	0
5.14	0.92		5.14	0.92
6.6	-0.1		6.6	0
5.76	1.19		5.76	1.19
6.81	0.24		6.81	0.24
5.01	-0.08		5.01	0
7.04	2.13		7.04	2.13
7.13	2.39		7.13	2.39
7.09	2.05		7.09	2.05
7.02	1.28		7.02	1.28
7.73	-0.07		7.73	0
6.25	-0.59		6.25	0
8.28	-0.21		8.28	0
6.39	1.4		6.39	1.4
7.82	-0.7		7.82	0
7.12	1.41		7.12	1.41
7.63	-0.79		7.63	0
6.59	0.84		6.59	0.84
8.45	3.22		8.45	3.22
7.85	2.16		7.85	2.16
8.37	1.14		8.37	1.14
8.49	2.71		8.49	2.71
9.05	0.3		9.05	0.3
5.63	-2.04		5.63	0
8.12	-0.22		8.12	0
7.42	1.95		7.42	1.95
8.38	0.24		8.38	0.24
5.26	0.1		5.26	0.1
7.73	-0.17		7.73	0
6.95	-0.41		6.95	0
7.63	0.85		7.63	0.85
7.36	2.06		7.36	2.06
9.03	3.13		9.03	3.13
9.06	2.04		9.06	2.04
8.74	0.76		8.74	0.76
6.6	1.15		6.6	1.15
9.75	1.03		9.75	1.03
5.58	0.88		5.58	0.88
8.3	0.34		8.3	0.34
7.29	-0.11		7.29	0
8.3	0.1		8.3	0.1
7.86	0.65		7.86	0.65
7.61	1.2		7.61	1.2
7.69	2.26		7.69	2.26
8.43	1.82		8.43	1.82
9.24	1.65		9.24	1.65
7.28	0.72		7.28	0.72
6.57	0.39		6.57	0.39
7.32	0.45		7.32	0.45
6.41	0.88		6.41	0.88
7.43	0.18		7.43	0.18
5.72	0.43		5.72	0.43
7.47	-0.5		7.47	0
6.7	0.7		6.7	0.7
7.38	1.05		7.38	1.05
7.91	2.43		7.91	2.43
8.25	2.82		8.25	2.82
8.12	1.37		8.12	1.37
5.88	0.89		5.88	0.89
4.61	-0.23		4.61	0
5.61	0.14		5.61	0.14
4.05	0.33		4.05	0.33
5.92	0.12		5.92	0.12
4.33	0.28		4.33	0.28
6.92	1.29		6.92	1.29
4.87	0.53		4.87	0.53
6.21	0.94		6.21	0.94
5.68	1.25		5.68	1.25
5.83	1.37		5.83	1.37
5.53	1.06		5.53	1.06
5.95	0.34		5.95	0.34
4.79	-0.1		4.79	0
6.11	0.21		6.11	0.21
5.16	0.93		5.16	0.93
6.27	0.58		6.27	0.58
4.69	0.2		4.69	0.2
6.71	0.05		6.71	0.05
5.12	-0.4		5.12	0
5.45	0.16		5.45	0.16
6.08	1.99		6.08	1.99
6.32	1.95		6.32	1.95
6.61	0.99		6.61	0.99
5.42	-0.45		5.42	0
4.48	0.64		4.48	0.64
5.96	0.43		5.96	0.43
4.53	0.8		4.53	0.8
5.19	-0.41		5.19	0
4.72	0.32		4.72	0.32
5.63	-0.08		5.63	0
5.93	1.57		5.93	1.57
5.76	1.67		5.76	1.67
5.43	1.37		5.43	1.37
5.69	0.76		5.69	0.76
6.26	1.35		6.26	1.35
8.28	0.8		8.28	0.8
5.47	-1.89		5.47	0
8.13	0.63		8.13	0.63
6.69	1.9		6.69	1.9
7.83	0.57		7.83	0.57
5.56	0.55		5.56	0.55
7.56	-1.24		7.56	0
6.51	-0.76		6.51	0
7.5	0.67		7.5	0.67
7.02	1.43		7.02	1.43
8.16	1.89		8.16	1.89
7.88	0.71		7.88	0.71
5.98	1.92		5.98	1.92
5.87	1.83		5.87	1.83
5.39	1.28		5.39	1.28
5.23	0.87		5.23	0.87
6.32	2		6.32	2
5.55	1.07		5.55	1.07
4.81	1.03		4.81	1.03
5.82	1.44		5.82	1.44
5.76	1.72		5.76	1.72
5.67	1.91		5.67	1.91
5.74	2.27		5.74	2.27
5.01	1.05		5.01	1.05
6.64	1.43		6.64	1.43
5.81	1.42		5.81	1.42
5.25	0.9		5.25	0.9
5.31	0.41		5.31	0.41
5.76	1.53		5.76	1.53
4.92	0.43		4.92	0.43
7.15	2.29		7.15	2.29
5.36	0.72		5.36	0.72
10.22	5.58		10.22	5.58
5.6	1.28		5.6	1.28
5.36	1.16		5.36	1.16
5.2	0.63		5.2	0.63
5.49	0.42		5.49	0.42
5.19	0.74		5.19	0.74
5.57	1.54		5.57	1.54
6.01	2.14		6.01	2.14
5.54	1.41		5.54	1.41
5.3	0.93		5.3	0.93
5.32	0.51		5.32	0.51
5.57	1.26		5.57	1.26
5.04	1.21		5.04	1.21
7	2.12		7	2.12
5.9	1.16		5.9	1.16
5.45	0.95		5.45	0.95
6.04	1.47		6.04	1.47
5.74	-0.81		5.74	0
5.27	-0.03		5.27	0
8.26	3.79		8.26	3.79
5.63	1.3		5.63	1.3
5.41	0.66		5.41	0.66
6.85	1.99		6.85	1.99
5.46	1.08		5.46	1.08
5.65	0.95		5.65	0.95
5.88	1.19		5.88	1.19
5.42	0.92		5.42	0.92
5.24	0.68		5.24	0.68
5.26	1.12		5.26	1.12
4.03	0.51		4.03	0.51
4.44	1.35		4.44	1.35
7.29	2.54		7.29	2.54
4.05	1.31		4.05	1.31
4.25	0.83		4.25	0.83
4.55	1.28		4.55	1.28
4.38	0.93		4.38	0.93
4.13	0.45		4.13	0.45
4.56	1		4.56	1
4.75	0.89		4.75	0.89
5.16	0.85		5.16	0.85
4.47	0.72		4.47	0.72
4.53	0.76		4.53	0.76
4.51	0.65		4.51	0.65
4.87	0.95		4.87	0.95
3.89	0.42		3.89	0.42
4.11	0.37		4.11	0.37
3.91	0.25		3.91	0.25
4.19	1.19		4.19	1.19
4.05	0.84		4.05	0.84
4.19	0.41		4.19	0.41
4.36	0.92		4.36	0.92
4.03	0.54		4.03	0.54
4.63	-0.65		4.63	0
4.18	1.34		4.18	1.34
4.36	-0.29		4.36	0
4.14	0.51		4.14	0.51
4.65	1.64		4.65	1.64
4.06	0.6		4.06	0.6
4.06	0.67		4.06	0.67
4.19	0.91		4.19	0.91
3.99	0.85		3.99	0.85
5.24	1.84		5.24	1.84
4.26	1.11		4.26	1.11
3.87	0.63		3.87	0.63
4.99	0.62		4.99	0.62
4.03	0.33		4.03	0.33
4.78	1.11		4.78	1.11
4.67	1.11		4.67	1.11
5.1	0.87		5.1	0.87
6.7	2.98		6.7	2.98
3.99	0.34		3.99	0.34
4.36	0.96		4.36	0.96
3.71	0.37		3.71	0.37
4.21	0.64		4.21	0.64
4.01	0.97		4.01	0.97
4.67	0.99		4.67	0.99
5.24	1.71		5.24	1.71
4.68	1.32		4.68	1.32
4.2	0.51		4.2	0.51
5	1.06		5	1.06
5.37	1.72		5.37	1.72
4.61	0.67		4.61	0.67
4.51	0.75		4.51	0.75
5.36	1.38		5.36	1.38
4.88	0.88		4.88	0.88
5.12	1.21		5.12	1.21
5.19	1.45		5.19	1.45
4.66	0.91		4.66	0.91
5.39	0.91		5.39	0.91
5.09	1.18		5.09	1.18
4.96	0.8		4.96	0.8
5.51	0.87		5.51	0.87
4.92	1.34		4.92	1.34
4.67	0.53		4.67	0.53
4.7	0.23		4.7	0.23
4.74	0.84		4.74	0.84
4.82	0.68		4.82	0.68
4.68	0.65		4.68	0.65
4.55	0.63		4.55	0.63
4.36	0.44		4.36	0.44
6.06	1.27		6.06	1.27
6.02	1.77		6.02	1.77
5.11	0.33		5.11	0.33
5.16	1.15		5.16	1.15
5.15	1.48		5.15	1.48
5.31	0.14		5.31	0.14
5.67	1.38		5.67	1.38
4.78	0.54		4.78	0.54
5.22	1.26		5.22	1.26
5.45	1.36		5.45	1.36
5.27	0.91		5.27	0.91
5.04	0.8		5.04	0.8
5.97	0.94		5.97	0.94
6.42	1.3		6.42	1.3
6.68	1.99		6.68	1.99
6.81	0.08		6.81	0.08
5.69	1.24		5.69	1.24
5.55	0.85		5.55	0.85
6.55	0.3		6.55	0.3
4.71	0.14		4.71	0.14
5.36	0.82		5.36	0.82
5.15	0.65		5.15	0.65
5.65	1.03		5.65	1.03
5.19	0.84		5.19	0.84
5.07	0.39		5.07	0.39
6.17	2.25		6.17	2.25
5.35	0.9		5.35	0.9
5.27	0.87		5.27	0.87
4.79	0.93		4.79	0.93
4.89	0.59		4.89	0.59
5.08	0.67		5.08	0.67
5.09	1.01		5.09	1.01
4.54	0.66		4.54	0.66
4.73	0.92		4.73	0.92
5.56	1.2		5.56	1.2
4.71	0.7		4.71	0.7
6.05	1.38		6.05	1.38
5.96	1.18		5.96	1.18
5.81	1.19		5.81	1.19
5.87	1.05		5.87	1.05
5.89	1.36		5.89	1.36
5.15	0.65		5.15	0.65
5.56	0.98		5.56	0.98
5.44	1.36		5.44	1.36
5.05	0.71		5.05	0.71
5.67	1.17		5.67	1.17
5.37	0.83		5.37	0.83
6.76	1.92		6.76	1.92
6.25	1.46		6.25	1.46
5.22	1.31		5.22	1.31
5.53	1.11		5.53	1.11
5.15	1.11		5.15	1.11
6.08	1.53		6.08	1.53
5.68	0.92		5.68	0.92
5.1	0.8		5.1	0.8
5.08	1.14		5.08	1.14
4.78	0.72		4.78	0.72
5.38	1.36		5.38	1.36
5.35	1.26		5.35	1.26
5.73	0.67		5.73	0.67
4.4	-0.2		4.4	0
4.54	1.39		4.54	1.39
3.88	0.59		3.88	0.59
3.8	0.43		3.8	0.43
3.68	0.42		3.68	0.42
3.62	0.1		3.62	0.1
3.64	0.28		3.64	0.28
3.75	0.69		3.75	0.69
3.5	0.31		3.5	0.31
4.11	0.78		4.11	0.78
4.55	1.25		4.55	1.25
3.87	0.47		3.87	0.47
6.28	-0.2		6.28	0
6.39	1.28		6.39	1.28
5.5	1.2		5.5	1.2
5.99	1.15		5.99	1.15
6.13	1.27		6.13	1.27
6.23	1.14		6.23	1.14
5.49	0.85		5.49	0.85
6.77	2.28		6.77	2.28
5.35	0.25		5.35	0.25
5.54	1.24		5.54	1.24
6.16	1.14		6.16	1.14
6.14	1.68		6.14	1.68
5.36	1.31		5.36	1.31
5.2	1.42		5.2	1.42
5.19	1.05		5.19	1.05
4.85	1.12		4.85	1.12
5.38	1.58		5.38	1.58
5.27	1.21		5.27	1.21
4.61	0.49		4.61	0.49
4.86	1.11		4.86	1.11
5.38	1.61		5.38	1.61
4.61	0.49		4.61	0.49
5.94	1.61		5.94	1.61
5.53	1.22		5.53	1.22
5.31	0.6		5.31	0.6
5.67	1.11		5.67	1.11
5.61	1		5.61	1
5.24	1.07		5.24	1.07
4.85	0.24		4.85	0.24
5.3	0.82		5.3	0.82
5.18	0.48		5.18	0.48
4.4	0.04		4.4	0.04
5.51	0.27		5.51	0.27
5.25	0.53		5.25	0.53
5.44	0.6		5.44	0.6
4.87	0.11		4.87	0.11
5.64	0.09		5.64	0.09
5.82	1.03		5.82	1.03
4.48	0.5		4.48	0.5
4.92	0.68		4.92	0.68
5.92	1.81		5.92	1.81
4.33	0.35		4.33	0.35
4.47	0.35		4.47	0.35
4.78	0.65		4.78	0.65
4.51	0.54		4.51	0.54
4.9	0.75		4.9	0.75
4.73	0.66		4.73	0.66
4.98	0.69		4.98	0.69
5.66	-0.52		5.66	0
6.33	2.57		6.33	2.57
5.14	0.85		5.14	0.85
5.67	1.48		5.67	1.48
4.39	0.95		4.39	0.95
4.14	0.27		4.14	0.27
4.4	0.86		4.4	0.86
4.95	1.21		4.95	1.21
4.62	0.86		4.62	0.86
4.68	0.65		4.68	0.65
4.62	0.89		4.62	0.89
4.27	0.34		4.27	0.34
4.6	0.97		4.6	0.97
4.19	1.29		4.19	1.29
4.49	1.21		4.49	1.21
4.78	0.86		4.78	0.86
4.76	1.3		4.76	1.3
3.71	0.25		3.71	0.25
5.17	0.9		5.17	0.9
6.18	2.98		6.18	2.98
4.39	0.81		4.39	0.81
5.13	1.07		5.13	1.07
4.29	0.99		4.29	0.99
3.79	0.37		3.79	0.37
7.19	1.05		7.19	1.05
6.41	1.18		6.41	1.18
6.29	0.73		6.29	0.73
6.82	0.79		6.82	0.79
6.92	1.1		6.92	1.1
5.86	0.18		5.86	0.18
6.38	0.5		6.38	0.5
6.19	0.94		6.19	0.94
6.06	0.59		6.06	0.59
6.2	0.5		6.2	0.5
5.55	0.32		5.55	0.32
6	0.65		6	0.65
5.28	0.82		5.28	0.82
5.52	1.12		5.52	1.12
5.07	0.76		5.07	0.76
4.95	0.73		4.95	0.73
5.31	1.53		5.31	1.53
5.89	1.44		5.89	1.44
5.28	0.24		5.28	0.24
4.94	0.75		4.94	0.75
5.09	1.15		5.09	1.15
4.98	0.72		4.98	0.72
5.47	1.34		5.47	1.34
5.59	0.21		5.59	0.21
5.29	1.57		5.29	1.57
4.43	0.8		4.43	0.8
5.35	1.87		5.35	1.87
5.19	1.12		5.19	1.12
4.62	0.83		4.62	0.83
3.95	0.15		3.95	0.15
4.22	0.41		4.22	0.41
6.03	1.99		6.03	1.99
4.46	0.65		4.46	0.65
4.2	0.2		4.2	0.2
4.42	1.08		4.42	1.08
4.34	0.5		4.34	0.5
4.66	0.85		4.66	0.85
4.4	1.1		4.4	1.1
4.43	0.69		4.43	0.69
4.47	0.4		4.47	0.4
4.44	0.65		4.44	0.65
4.2	-0.2		4.2	0
4.59	0.43		4.59	0.43
4.28	0.19		4.28	0.19
4.39	0.37		4.39	0.37
3.98	0.25		3.98	0.25
4.25	0.34		4.25	0.34
4.59	0.29		4.59	0.29
4.63	1.1		4.63	1.1
4.35	1.14		4.35	1.14
4.12	1.11		4.12	1.11
4.55	1.11		4.55	1.11
4.24	1.29		4.24	1.29
5	0.84		5	0.84
4.29	1.04		4.29	1.04
4.34	0.89		4.34	0.89
4.24	0.76		4.24	0.76
4.38	0.81		4.38	0.81
4.3	0.88		4.3	0.88
4.3	0.65		4.3	0.65
4.34	0.62		4.34	0.62
4.32	1.22		4.32	1.22
4.47	1.25		4.47	1.25
5.06	1.43		5.06	1.43
4.92	1.53		4.92	1.53
4.6	1.38		4.6	1.38
4.84	0.92		4.84	0.92
4.71	1.21		4.71	1.21
4.11	1.06		4.11	1.06
4.86	0.91		4.86	0.91
4.7	1.13		4.7	1.13
4.17	0.5		4.17	0.5
4.52	0.75		4.52	0.75
3.61	0.73		3.61	0.73
4.27	0.99		4.27	0.99
3.99	1		3.99	1
3.53	0.6		3.53	0.6
4.37	1.08		4.37	1.08
5.24	1.98		5.24	1.98
4.12	0.87		4.12	0.87
3.93	1.1		3.93	1.1
4.12	0.92		4.12	0.92
5.09	1.66		5.09	1.66
6.84	-2.61		6.84	0
4.34	1.01		4.34	1.01
4.1	0.79		4.1	0.79
3.99	0.66		3.99	0.66
4.47	1.04		4.47	1.04
4.52	1.57		4.52	1.57
4	0.42		4	0.42
4.39	0.56		4.39	0.56
4.49	1.34		4.49	1.34
4.91	1.71		4.91	1.71
4.86	0.66		4.86	0.66
4.28	0.68		4.28	0.68
4.76	-0.23		4.76	0
4.35	0.7		4.35	0.7
4.14	0.33		4.14	0.33
4.62	0.88		4.62	0.88
4.63	0.74		4.63	0.74
3.68	0.83		3.68	0.83
3.96	0.7		3.96	0.7
4.65	1.02		4.65	1.02
4.6	0.84		4.6	0.84
4.58	1		4.58	1
4.45	0.73		4.45	0.73
4.97	1.53		4.97	1.53
4.7	1.47		4.7	1.47
4.45	0.68		4.45	0.68
4.02	0.91		4.02	0.91
3.88	0.48		3.88	0.48
3.98	0.72		3.98	0.72
3.75	0.79		3.75	0.79
3.74	0.93		3.74	0.93
3.93	0.48		3.93	0.48
4.19	1.19		4.19	1.19
4.39	0.78		4.39	0.78
4.29	1		4.29	1
4.27	0.09		4.27	0.09
4.65	0.66		4.65	0.66
4.02	1.03		4.02	1.03
3.49	0.81		3.49	0.81
3.2	0.28		3.2	0.28
3.93	1.36		3.93	1.36
3.54	1.6		3.54	1.6
3.1	0.38		3.1	0.38
4.01	0.77		4.01	0.77
3.71	0.81		3.71	0.81
4.15	1.09		4.15	1.09
4.38	0.83		4.38	0.83
3.63	0.89		3.63	0.89
3.8	0.64		3.8	0.64
3.77	0.65		3.77	0.65
3.56	0.7		3.56	0.7
3.47	0.61		3.47	0.61
3.88	0.79		3.88	0.79
3.68	1.11		3.68	1.11
3.47	0.78		3.47	0.78
3.5	0.57		3.5	0.57
3.77	0.69		3.77	0.69
3.14	0.21		3.14	0.21
4.16	1.03		4.16	1.03
3.89	1.05		3.89	1.05
3.73	0.91		3.73	0.91
3.86	0.6		3.86	0.6
3.77	0.81		3.77	0.81
3.45	0.44		3.45	0.44
4.11	1.06		4.11	1.06
4.15	0.96		4.15	0.96
3.94	0.43		3.94	0.43
3.86	0.75		3.86	0.75
3.97	0.7		3.97	0.7
3.79	0.48		3.79	0.48
4.01	1		4.01	1
3.66	1.13		3.66	1.13
3.45	0.37		3.45	0.37
3.69	-0.06		3.69	0
4.16	1.08		4.16	1.08
4.01	0.51		4.01	0.51
4.24	0.95		4.24	0.95
4.24	1.29		4.24	1.29
4	0.38		4	0.38
4.26	1.11		4.26	1.11
4.34	0.9		4.34	0.9
4.3	0.93		4.3	0.93
4.12	0.77		4.12	0.77
4.09	0.86		4.09	0.86
4.05	0.72		4.05	0.72
7.51	1.57		7.51	1.57
6.45	1.44		6.45	1.44
7.05	1.87		7.05	1.87
7.02	1.74		7.02	1.74
7.2	2.09		7.2	2.09
7.13	1.21		7.13	1.21
5.81	0.31		5.81	0.31
6.67	1.44		6.67	1.44
6.95	0.97		6.95	0.97
6.71	1.46		6.71	1.46
7.46	2.38		7.46	2.38
6.41	0.91		6.41	0.91
6.23	1.48		6.23	1.48
6.33	1.91		6.33	1.91
6.46	1.17		6.46	1.17
6.27	1.1		6.27	1.1
5.69	0.85		5.69	0.85
6.7	1.56		6.7	1.56
6.28	1.35		6.28	1.35
6.49	1.26		6.49	1.26
6.84	1.83		6.84	1.83
6.82	1.88		6.82	1.88
6.68	2.14		6.68	2.14
6.28	0.8		6.28	0.8
8.47	2.61		8.47	2.61
6.91	2.17		6.91	2.17
6.45	1.16		6.45	1.16
7.06	1.37		7.06	1.37
6.95	2.21		6.95	2.21
5.92	0.74		5.92	0.74
6.84	1.56		6.84	1.56
7.97	2.19		7.97	2.19
6.42	0.92		6.42	0.92
7.01	0.18		7.01	0.18
8.94	2.73		8.94	2.73
6.24	1.18		6.24	1.18
7.49	1.76		7.49	1.76
7.89	2.14		7.89	2.14
6.25	0.75		6.25	0.75
7.03	1.58		7.03	1.58
5.74	1.03		5.74	1.03
6.03	0.27		6.03	0.27
6	0.61		6	0.61
5.85	0.25		5.85	0.25
6.45	0.46		6.45	0.46
7.18	1.78		7.18	1.78
6.39	1.79		6.39	1.79
7.58	1.11		7.58	1.11
8.37	1.58		8.37	1.58
8.56	2.72		8.56	2.72
7.59	1.46		7.59	1.46
7.42	0.94		7.42	0.94
7.48	2.36		7.48	2.36
7.18	0.63		7.18	0.63
8.13	2.19		8.13	2.19
7.51	1.87		7.51	1.87
7.94	1.43		7.94	1.43
7.32	1.82		7.32	1.82
9.14	3.58		9.14	3.58
7.5	1.47		7.5	1.47
7.51	0.2		7.51	0.2
6.95	1.89		6.95	1.89
6.41	1.31		6.41	1.31
7.5	1.79		7.5	1.79
7.96	2.28		7.96	2.28
7.39	2.04		7.39	2.04
6.78	1.32		6.78	1.32
7.83	-0.37		7.83	0
7.88	1.67		7.88	1.67
7.1	1.43		7.1	1.43
8.25	0.9		8.25	0.9
7.52	1.61		7.52	1.61
7.34	1.15		7.34	1.15
9.04	3.3		9.04	3.3
7.69	1.73		7.69	1.73
8.46	1.52		8.46	1.52
8.2	2.63		8.2	2.63
8.38	2.21		8.38	2.21
7.74	0.11		7.74	0.11
8.68	2.11		8.68	2.11
9.25	2.64		9.25	2.64
9.79	3.84		9.79	3.84
8.07	2.9		8.07	2.9
7.54	0.52		7.54	0.52
8.5	1.99		8.5	1.99
7.6	1.94		7.6	1.94
8.68	2.57		8.68	2.57
7.94	2.01		7.94	2.01
7.67	1.66		7.67	1.66
8.82	1.56		8.82	1.56
7.4	1.31		7.4	1.31
8.02	2.07		8.02	2.07
9.05	3.12		9.05	3.12
7.37	1.56		7.37	1.56
8.08	2.62		8.08	2.62
8.06	1.82		8.06	1.82
7.57	1.91		7.57	1.91
9.7	3.88		9.7	3.88
7.75	1.81		7.75	1.81
8.54	2.2		8.54	2.2
8.14	2.63		8.14	2.63
8.41	2.01		8.41	2.01
8.24	2.35		8.24	2.35
8.09	2.08		8.09	2.08
7.98	2.26		7.98	2.26
8.56	1.36		8.56	1.36
9.27	3.36		9.27	3.36
8.51	2.71		8.51	2.71
6.88	1.68		6.88	1.68
7.08	2.3		7.08	2.3
6.58	1.22		6.58	1.22
6.77	1.66		6.77	1.66
9.19	4.53		9.19	4.53
7.06	0.7		7.06	0.7
7.61	2.12		7.61	2.12
7.49	2.51		7.49	2.51
6.96	0.45		6.96	0.45
6.26	1.52		6.26	1.52
7.78	2.62		7.78	2.62
6.77	1.14		6.77	1.14
6.9	1.42		6.9	1.42
6.96	2.06		6.96	2.06
6.8	1.82		6.8	1.82
7.62	1.31		7.62	1.31
6.99	2.3		6.99	2.3
7.23	1.31		7.23	1.31
7.01	1.31		7.01	1.31
8.03	2.56		8.03	2.56
7.39	1.86		7.39	1.86
7.52	1.76		7.52	1.76
7.5	1.43		7.5	1.43
7.68	2.13		7.68	2.13
5.94	1.35		5.94	1.35
5.96	1.15		5.96	1.15
5.97	1.57		5.97	1.57
5.81	1.19		5.81	1.19
6.97	2.03		6.97	2.03
5.72	1.26		5.72	1.26
6.12	1.31		6.12	1.31
6.94	1.1		6.94	1.1
5.99	1.32		5.99	1.32
5.57	1.4		5.57	1.4
6.06	1.95		6.06	1.95
5.64	1.61		5.64	1.61
6.47	1.63		6.47	1.63
6.96	1.64		6.96	1.64
6.38	0.51		6.38	0.51
6.39	1.54		6.39	1.54
7.96	3.88		7.96	3.88
6.04	0.26		6.04	0.26
5.76	1.06		5.76	1.06
7.15	2.52		7.15	2.52
6.13	1.02		6.13	1.02
7.27	2.41		7.27	2.41
7	2.43		7	2.43
6.72	1.53		6.72	1.53
7.06	1.66		7.06	1.66
6.42	1.81		6.42	1.81
5.94	1.14		5.94	1.14
7.11	1.44		7.11	1.44
7.32	2.25		7.32	2.25
5.64	0.4		5.64	0.4
6.4	0.63		6.4	0.63
6.49	1.35		6.49	1.35
6.39	0.59		6.39	0.59
6.48	2.11		6.48	2.11
6.68	2.14		6.68	2.14
6.38	0.91		6.38	0.91
6.58	1.03		6.58	1.03
7.15	2		7.15	2
6.24	1.26		6.24	1.26
6.64	1.32		6.64	1.32
6.93	2.23		6.93	2.23
6.77	1.76		6.77	1.76
7.72	2.45		7.72	2.45
6.89	2.06		6.89	2.06
7.2	1.94		7.2	1.94
6.77	1.13		6.77	1.13
7.03	2.42		7.03	2.42
7.57	2.81		7.57	2.81
7.59	0.84		7.59	0.84
6.74	0.86		6.74	0.86
6.39	0.38		6.39	0.38
9.15	1.73		9.15	1.73
6.85	0.83		6.85	0.83
6.5	0.79		6.5	0.79
6.83	0.79		6.83	0.79
7.25	1.48		7.25	1.48
7.18	1.16		7.18	1.16
7.72	1.79		7.72	1.79
7.38	1.59		7.38	1.59
7.16	2.07		7.16	2.07
8.04	2.03		8.04	2.03
8.68	3.05		8.68	3.05
7.65	1.78		7.65	1.78
7.81	1.78		7.81	1.78
8.04	2.98		8.04	2.98
7.11	0.94		7.11	0.94
7.58	1.65		7.58	1.65
8.16	2.11		8.16	2.11
7.43	0.01		7.43	0.01
7.23	1.21		7.23	1.21
8.53	0.77		8.53	0.77
8.32	2.65		8.32	2.65
8.37	2.59		8.37	2.59
7.83	1.89		7.83	1.89
7.02	1.64		7.02	1.64
7.01	2.2		7.01	2.2
7.47	1.84		7.47	1.84
7.51	2.06		7.51	2.06
8.65	3.25		8.65	3.25
8.75	3.25		8.75	3.25
8.22	2.78		8.22	2.78
7.85	2.76		7.85	2.76
8.36	2.91		8.36	2.91
7.22	2.14		7.22	2.14
7.12	2.26		7.12	2.26
6.6	1.57		6.6	1.57
6.43	1.13		6.43	1.13
7.06	2.46		7.06	2.46
6.85	0.95		6.85	0.95
7.37	1.71		7.37	1.71
7.04	1.77		7.04	1.77
8.23	2.81		8.23	2.81
7.61	2.37		7.61	2.37
8.32	4.08		8.32	4.08
7.34	2.25		7.34	2.25
5.31	0.73		5.31	0.73
5.98	1.1		5.98	1.1
5.18	0.51		5.18	0.51
6.34	1.42		6.34	1.42
6.79	1.61		6.79	1.61
6.39	0.17		6.39	0.17
6.2	1.08		6.2	1.08
6.71	1.28		6.71	1.28
6.78	1.38		6.78	1.38
5.96	1.08		5.96	1.08
7.79	3.02		7.79	3.02
6.54	2.31		6.54	2.31
6.84	1.86		6.84	1.86
7.78	2.87		7.78	2.87
6.91	1.95		6.91	1.95
6.63	1.78		6.63	1.78
7.48	2.47		7.48	2.47
7.6	1.75		7.6	1.75
7.35	1.91		7.35	1.91
6.73	1.66		6.73	1.66
7.07	1.93		7.07	1.93
6.85	1.62		6.85	1.62
7.45	2.65		7.45	2.65
7.52	2.63		7.52	2.63
6.25	1.65		6.25	1.65
6.2	1.69		6.2	1.69
5.79	0.66		5.79	0.66
6.78	1.67		6.78	1.67
6.94	2.55		6.94	2.55
6.05	0.52		6.05	0.52
5.68	0.75		5.68	0.75
5.97	0.61		5.97	0.61
6.98	1.89		6.98	1.89
6.12	1.79		6.12	1.79
10.3	3.38		10.3	3.38
6.05	1.14		6.05	1.14
6.54	1.72		6.54	1.72
6.77	2.43		6.77	2.43
6.93	1.93		6.93	1.93
6.9	2.11		6.9	2.11
8.55	4.22		8.55	4.22
7.03	1.82		7.03	1.82
7.16	1.82		7.16	1.82
6.61	1.69		6.61	1.69
6.74	1.3		6.74	1.3
7.47	2.85		7.47	2.85
6.98	0.55		6.98	0.55
6.77	0.91		6.77	0.91
5.52	0.91		5.52	0.91
7.3	1.9		7.3	1.9
6.81	1.83		6.81	1.83
6.55	1.11		6.55	1.11
5.96	1.59		5.96	1.59
6.06	1.22		6.06	1.22
7.27	2.31		7.27	2.31
7.33	1.78		7.33	1.78
7.64	2.43		7.64	2.43
6.32	1.69		6.32	1.69
6.47	2.47		6.47	2.47
6.56	1.88		6.56	1.88
8.04	0.39		8.04	0.39
6.7	0.95		6.7	0.95
6.52	0.63		6.52	0.63
6.93	1.42		6.93	1.42
7.15	1.73		7.15	1.73
6.75	0.48		6.75	0.48
6.51	0.67		6.51	0.67
6.86	0		6.86	0
7.8	2.12		7.8	2.12
7.35	1.81		7.35	1.81
6.93	2.14		6.93	2.14
7.41	1.79		7.41	1.79
7.66	1.64		7.66	1.64
8.05	1.21		8.05	1.21
7.55	0.8		7.55	0.8
8.3	2.65		8.3	2.65
7.81	1.95		7.81	1.95
8.6	0.97		8.6	0.97
6.68	1.08		6.68	1.08
7.26	0.03		7.26	0.03
7.87	0.83		7.87	0.83
7.63	1.83		7.63	1.83
10.56	5.3		10.56	5.3
8.21	1.64		8.21	1.64
6.79	1.94		6.79	1.94
7.6	2.36		7.6	2.36
7.21	1.79		7.21	1.79
7	1.75		7	1.75
6.91	2.26		6.91	2.26
6.92	1.46		6.92	1.46
6.8	1.73		6.8	1.73
6.6	1.27		6.6	1.27
7.9	2.06		7.9	2.06
7.44	2.42		7.44	2.42
10.34	3.5		10.34	3.5
7.71	2.16		7.71	2.16
8.38	2.68		8.38	2.68
7.73	2.47		7.73	2.47
7.58	2.15		7.58	2.15
7.86	1.91		7.86	1.91
7.57	2.84		7.57	2.84
6.99	1.01		6.99	1.01
6.8	1.27		6.8	1.27
7.86	2.38		7.86	2.38
10.62	4.75		10.62	4.75
7.1	1.21		7.1	1.21
7.17	0.99		7.17	0.99
7.68	1.35		7.68	1.35
9.25	3.63		9.25	3.63
6.94	1.8		6.94	1.8
6.47	-0.19		6.47	0
7.08	0.82		7.08	0.82
6.8	1.44		6.8	1.44
6.01	-0.3		6.01	0
6.41	0.69		6.41	0.69
7.68	1.89		7.68	1.89
7.16	1.69		7.16	1.69
7.68	1.68		7.68	1.68
6.71	1.91		6.71	1.91
6.51	0.99		6.51	0.99
6.94	1.65		6.94	1.65
7.41	2.53		7.41	2.53
7.74	2.15		7.74	2.15
6.9	1.82		6.9	1.82
6.8	1.57		6.8	1.57
7.74	1.57		7.74	1.57
6.85	0.73		6.85	0.73
6.8	1.23		6.8	1.23
7.61	2.04		7.61	2.04
7.26	2.24		7.26	2.24
7.45	2.46		7.45	2.46
7.44	1.75		7.44	1.75
6.34	1.95		6.34	1.95
6.9	2.21		6.9	2.21
5.89	1.07		5.89	1.07
5.33	0.17		5.33	0.17
5.82	1.74		5.82	1.74
5.18	0.42		5.18	0.42
5.13	0.32		5.13	0.32
5.82	0.51		5.82	0.51
6.22	1.33		6.22	1.33
5.77	0.75		5.77	0.75
6.32	1.21		6.32	1.21
5.41	1.06		5.41	1.06
7.31	1.95		7.31	1.95
7.04	2.34		7.04	2.34
6.39	0.66		6.39	0.66
7.5	2.12		7.5	2.12
8.52	3.78		8.52	3.78
7.07	1.7		7.07	1.7
7.68	1.27		7.68	1.27
7.45	2.85		7.45	2.85
7.6	2.57		7.6	2.57
7.41	1.99		7.41	1.99
7.46	1.5		7.46	1.5
7.46	1.7		7.46	1.7
7	0.99		7	0.99
7.55	1.49		7.55	1.49
7.24	1.3		7.24	1.3
6.85	1.57		6.85	1.57
7.12	2.02		7.12	2.02
7.09	2.05		7.09	2.05
6.74	1.53		6.74	1.53
6.38	1.25		6.38	1.25
5.86	-0.1		5.86	0
7.85	2.07		7.85	2.07
6.7	0.49		6.7	0.49
7.53	2.12		7.53	2.12
7.26	1.96		7.26	1.96
8.89	3.07		8.89	3.07
6.8	2.01		6.8	2.01
6.77	1.8		6.77	1.8
6.8	1.19		6.8	1.19
6.93	1.18		6.93	1.18
7.04	1.6		7.04	1.6
7.31	2.17		7.31	2.17
6.33	1.07		6.33	1.07
6.92	1.81		6.92	1.81
7.13	1.6		7.13	1.6
7.16	1.85		7.16	1.85
6.48	1.26		6.48	1.26
7.69	1.79		7.69	1.79
7.55	1.83		7.55	1.83
6.82	2		6.82	2
7.75	3.06		7.75	3.06
8.18	2.18		8.18	2.18
7.03	1.43		7.03	1.43
6.71	1.8		6.71	1.8
8.26	2.88		8.26	2.88
7.25	1.8		7.25	1.8
7.36	2.21		7.36	2.21
7.89	2.22		7.89	2.22
7.75	0.06		7.75	0.06
8.06	2		8.06	2
8.5	2.06		8.5	2.06
7.6	1.45		7.6	1.45
8.74	2.74		8.74	2.74
8.65	2.78		8.65	2.78
7.84	1.16		7.84	1.16
7.81	2.79		7.81	2.79
8.24	1.77		8.24	1.77
8.85	1.67		8.85	1.67
7.68	1.41		7.68	1.41
8.55	1.49		8.55	1.49
7.64	2.55		7.64	2.55
8.19	1.85		8.19	1.85
7.74	2.06		7.74	2.06
8.32	1.93		8.32	1.93
7.87	2.45		7.87	2.45
6.98	0.96		6.98	0.96
7.66	2.15		7.66	2.15
6.6	0.69		6.6	0.69
6.26	1		6.26	1
7.35	1.31		7.35	1.31
7.4	2.3		7.4	2.3
7.74	1.53		7.74	1.53
7.74	2.36		7.74	2.36
7.44	1.86		7.44	1.86
7.03	1.89		7.03	1.89
8.85	2.3		8.85	2.3
6.5	1.21		6.5	1.21
6.27	0.19		6.27	0.19
7.24	2.12		7.24	2.12
6.5	1.64		6.5	1.64
6.06	1.27		6.06	1.27
7.27	0.64		7.27	0.64
7.04	1.14		7.04	1.14
5.97	0.68		5.97	0.68
6.16	1.03		6.16	1.03
6.19	1.53		6.19	1.53
5	0.36		5	0.36
6.15	1.32		6.15	1.32
5.14	1.13		5.14	1.13
5.5	1.25		5.5	1.25
6.18	2.24		6.18	2.24
5.88	1.95		5.88	1.95
5.68	1.64		5.68	1.64
6.01	1.04		6.01	1.04
6.45	1.9		6.45	1.9
5.88	0.08		5.88	0.08
7.31	2.34		7.31	2.34
7.33	2.61		7.33	2.61
6.91	2.15		6.91	2.15
6.74	1.07		6.74	1.07
6.17	1.82		6.17	1.82
5.57	0.12		5.57	0.12
6.56	2.04		6.56	2.04
6.36	0.62		6.36	0.62
6.52	1.24		6.52	1.24
6.1	1.41		6.1	1.41
6.09	1.45		6.09	1.45
6.35	1.18		6.35	1.18
7.3	2.99		7.3	2.99
5.84	1.86		5.84	1.86
5.71	1.44		5.71	1.44
7.26	2.13		7.26	2.13
5.14	1.24		5.14	1.24
4.69	0.19		4.69	0.19
5.85	1.11		5.85	1.11
5.4	0.85		5.4	0.85
4.83	1.14		4.83	1.14
6.47	1.24		6.47	1.24
6.4	1.31		6.4	1.31
5.99	1.38		5.99	1.38
7.84	3.02		7.84	3.02
6.53	2.27		6.53	2.27
6.03	2.05		6.03	2.05
6.73	1.17		6.73	1.17
5.7	1.12		5.7	1.12
5.8	1.5		5.8	1.5
6.88	1.92		6.88	1.92
6.22	1.45		6.22	1.45
7.24	2.88		7.24	2.88
7.14	1.85		7.14	1.85
7.33	2.06		7.33	2.06
5.76	0.82		5.76	0.82
7.03	3.1		7.03	3.1
6.21	1.76		6.21	1.76
6.9	2.84		6.9	2.84
6.1	1.18		6.1	1.18
6.13	2.21		6.13	2.21
5.46	0.91		5.46	0.91
6.02	1.04		6.02	1.04
7.56	3.12		7.56	3.12
6.3	1.68		6.3	1.68
7.2	2.12		7.2	2.12
6.23	1.96		6.23	1.96
6.88	2.35		6.88	2.35
6.93	1.95		6.93	1.95
6.42	1.59		6.42	1.59
6.5	1.8		6.5	1.8
6.92	1.27		6.92	1.27
6.96	2.18		6.96	2.18
7.16	0.89		7.16	0.89
9.72	3.92		9.72	3.92
6.91	1.53		6.91	1.53
7.43	1.89		7.43	1.89
7.18	1.5		7.18	1.5
6.58	1.3		6.58	1.3
5.77	0.9		5.77	0.9
7.71	1.74		7.71	1.74
7.53	2.61		7.53	2.61
7.16	2.57		7.16	2.57
6.19	0.97		6.19	0.97
6.45	1.08		6.45	1.08
6.07	1.13		6.07	1.13
9.23	3.78		9.23	3.78
6.85	1.1		6.85	1.1
5.92	1.17		5.92	1.17
7.01	1.4		7.01	1.4
7.05	1.36		7.05	1.36
7.04	2.06		7.04	2.06
7.19	2.59		7.19	2.59
6.6	1.68		6.6	1.68
5.9	1.43		5.9	1.43
6.06	1.13		6.06	1.13
5.81	1.65		5.81	1.65
4.81	0.62		4.81	0.62
5.78	0.89		5.78	0.89
5.54	1.06		5.54	1.06
5.18	1.1		5.18	1.1
5.5	0.84		5.5	0.84
5.33	1.33		5.33	1.33
5.25	1.06		5.25	1.06
5.7	2.31		5.7	2.31
6.07	2.18		6.07	2.18
4.76	0.92		4.76	0.92
5.65	1.47		5.65	1.47
4.87	1.76		4.87	1.76
4.66	0.91		4.66	0.91
5.2	0.43		5.2	0.43
4.92	0.51		4.92	0.51
4.31	0.94		4.31	0.94
4.62	0.68		4.62	0.68
5.34	1.41		5.34	1.41
4.56	0.92		4.56	0.92
5.88	1.34		5.88	1.34
5.35	0.51		5.35	0.51
4.95	0.85		4.95	0.85
6.2	2.37		6.2	2.37
5.97	2.04		5.97	2.04
4.91	0.52		4.91	0.52
5.23	0.69		5.23	0.69
5.22	1.65		5.22	1.65
5.21	1.65		5.21	1.65
6.31	1.68		6.31	1.68
6.08	1.65		6.08	1.65
5.67	1.49		5.67	1.49
6.33	2.02		6.33	2.02
5.73	1.91		5.73	1.91
5.45	0.46		5.45	0.46
6.31	1.65		6.31	1.65
6.18	1.9		6.18	1.9
7.16	1.83		7.16	1.83
5.87	1.22		5.87	1.22
5.3	0.71		5.3	0.71
5.85	1.87		5.85	1.87
7.33	2.56		7.33	2.56
5.97	1.38		5.97	1.38
5.52	0.59		5.52	0.59
6.04	1.24		6.04	1.24
5.34	0.97		5.34	0.97
5.99	1.69		5.99	1.69
6.31	1.7		6.31	1.7
7.53	2.9		7.53	2.9
6.08	1.62		6.08	1.62
5.83	1.23		5.83	1.23
7.17	1.83		7.17	1.83
6.12	2.37		6.12	2.37
6.08	2		6.08	2
6.1	1.69		6.1	1.69
5.36	0.6		5.36	0.6
5.73	1.75		5.73	1.75
6.91	3.49		6.91	3.49
5.15	1.65		5.15	1.65
6.5	2.15		6.5	2.15
5.48	1.31		5.48	1.31
5.06	1.23		5.06	1.23
6.29	2.14		6.29	2.14
4.84	1.06		4.84	1.06
7.28	3.6		7.28	3.6
5.84	1.37		5.84	1.37
5.88	1.01		5.88	1.01
6.58	2.6		6.58	2.6
6.78	1.86		6.78	1.86
5.97	2.07		5.97	2.07
5.54	1.47		5.54	1.47
6.63	1.98		6.63	1.98
7.48	3.08		7.48	3.08
6.04	0.61		6.04	0.61
6.7	1.86		6.7	1.86
5.81	1.29		5.81	1.29
5.94	1.87		5.94	1.87
6.1	1.51		6.1	1.51
6.22	1.72		6.22	1.72
6.32	1.28		6.32	1.28
6.55	1.61		6.55	1.61
6.13	2.1		6.13	2.1
5.93	1.47		5.93	1.47
6.42	1.91		6.42	1.91
6.31	1.82		6.31	1.82
6.76	1.68		6.76	1.68
6.35	0.84		6.35	0.84
6.04	1.62		6.04	1.62
6.01	1.5		6.01	1.5
6.15	1.46		6.15	1.46
6.61	0.27		6.61	0.27
5.57	0.97		5.57	0.97
6.68	1.97		6.68	1.97
6.71	2.17		6.71	2.17
6.28	1.6		6.28	1.6
5.88	1.13		5.88	1.13
6.03	1.39		6.03	1.39
6.28	1.19		6.28	1.19
7.49	2.01		7.49	2.01
5.43	1.29		5.43	1.29
6.17	1.31		6.17	1.31
6	0.25		6	0.25
5.99	0.62		5.99	0.62
6.67	1.64		6.67	1.64
5.87	0.65		5.87	0.65
4.95	0.11		4.95	0.11
5.19	0.54		5.19	0.54
6.06	1.25		6.06	1.25
5.96	1.43		5.96	1.43
5.52	1.18		5.52	1.18
6.5	1.8		6.5	1.8
6.64	1.55		6.64	1.55
5.45	1.16		5.45	1.16
5.91	0.95		5.91	0.95
6.24	1.71		6.24	1.71
5.5	0.96		5.5	0.96
6.1	1.97		6.1	1.97
5.38	1.45		5.38	1.45
4.85	0.74		4.85	0.74
5.8	1.31		5.8	1.31
5.55	1.72		5.55	1.72
4.77	0.23		4.77	0.23
5.01	0.56		5.01	0.56
5.1	1.11		5.1	1.11
5.13	0.9		5.13	0.9
5.68	1.28		5.68	1.28
5.43	1.39		5.43	1.39
5.2	1.17		5.2	1.17
5.74	1.38		5.74	1.38
5.01	0.85		5.01	0.85
5.23	1.28		5.23	1.28
5.82	1.19		5.82	1.19
5.48	1.9		5.48	1.9
4.93	1.01		4.93	1.01
5.55	0.81		5.55	0.81
6.15	1.34		6.15	1.34
5.31	1.46		5.31	1.46
5.65	0.87		5.65	0.87
5.97	1.42		5.97	1.42
5.43	1.21		5.43	1.21
7.22	1.31		7.22	1.31
5.79	1.16		5.79	1.16
5.19	0.44		5.19	0.44
6.38	1.13		6.38	1.13
5.87	0.95		5.87	0.95
5.1	0.64		5.1	0.64
5.74	0.6		5.74	0.6
5.95	0.9		5.95	0.9
5.57	1.1		5.57	1.1
6.21	1.55		6.21	1.55
5.68	1.47		5.68	1.47
4.91	0.55		4.91	0.55
7.19	0.78		7.19	0.78
7.35	0.74		7.35	0.74
5.93	0.91		5.93	0.91
7.34	1.25		7.34	1.25
8.89	0.95		8.89	0.95
5.8	0.08		5.8	0.08
6.54	0.61		6.54	0.61
[truncated: 715 more rows]

## Sheet: EPIC 3 WT mouse serum
EPIC 3: Anti-Neu5Gc, total and inhibitable, (ug/ml) quantified by ELISA using wild type mouse serum antigens (N=1469)
			Negative values zeroed
Total Anti-Neu5Gc	Inhibitable anti-Neu5Gc		Total Anti-Neu5Gc	Inhibitable anti-Neu5Gc
1.28	1.07		1.28	1.07
2.7	1.52		2.7	1.52
0.26	-0.01		0.26	0
0.42	-0.02		0.42	0
1.18	0.78		1.18	0.78
0.63	0.25		0.63	0.25
0.37	0		0.37	0
0.17	0.01		0.17	0.01
1.82	0.74		1.82	0.74
0.44	-0.06		0.44	0
0.16	-0.2		0.16	0
0.03	0.04		0.03	0.04
1.45	0.79		1.45	0.79
0.9	0.16		0.9	0.16
0.48	-0.01		0.48	0
0.75	0.14		0.75	0.14
0.34	-0.01		0.34	0
0.58	0.08		0.58	0.08
0.64	0.26		0.64	0.26
0.26	0.01		0.26	0.01
0.29	-0.01		0.29	0
0.28	-0.02		0.28	0
0.46	0.01		0.46	0.01
0.41	0.03		0.41	0.03
0.45	-0.09		0.45	0
0.45	-0.04		0.45	0
0.15	-0.14		0.15	0
0.21	-0.15		0.21	0
0.34	-0.01		0.34	0
1	0.53		1	0.53
0.26	-0.06		0.26	0
0.25	-0.04		0.25	0
0.35	0.01		0.35	0.01
0.21	0.03		0.21	0.03
0.3	-0.07		0.3	0
0.46	-0.04		0.46	0
0.16	-0.15		0.16	0
0.42	0.02		0.42	0.02
0.33	-0.08		0.33	0
0.24	-0.04		0.24	0
0.33	-0.02		0.33	0
0.32	-0.01		0.32	0
0.37	0.01		0.37	0.01
0.22	-0.02		0.22	0
0.31	-0.03		0.31	0
0.25	-0.05		0.25	0
0.28	-0.08		0.28	0
0.59	0.24		0.59	0.24
0.23	-0.02		0.23	0
0.29	-0.01		0.29	0
0.56	-0.05		0.56	0
0.24	-0.03		0.24	0
0.35	-0.02		0.35	0
0.29	-0.11		0.29	0
0.43	0		0.43	0
1.26	0.64		1.26	0.64
0.33	-0.02		0.33	0
1.02	0.62		1.02	0.62
0.24	0.02		0.24	0.02
0.43	-0.01		0.43	0
0.31	0		0.31	0
0.28	0		0.28	0
0.46	0		0.46	0
0.48	0.11		0.48	0.11
0.24	0.01		0.24	0.01
0.25	0.04		0.25	0.04
0.3	-0.03		0.3	0
0.94	0.55		0.94	0.55
0.38	0.04		0.38	0.04
0.19	0.04		0.19	0.04
0.48	0.08		0.48	0.08
0.32	0.11		0.32	0.11
0.53	0.1		0.53	0.1
0.29	0.04		0.29	0.04
0.43	0.02		0.43	0.02
0.42	-0.01		0.42	0
3.64	3.13		3.64	3.13
0.31	0.04		0.31	0.04
0.42	0.08		0.42	0.08
0.48	-0.11		0.48	0
0.24	0.02		0.24	0.02
0.47	0.23		0.47	0.23
0.76	0.44		0.76	0.44
0.23	0.02		0.23	0.02
0.58	0.08		0.58	0.08
0.17	0.04		0.17	0.04
0.45	0.05		0.45	0.05
0.31	0.03		0.31	0.03
0.4	0.15		0.4	0.15
0.76	-1.46		0.76	0
0.37	0.01		0.37	0.01
0.32	-0.13		0.32	0
0.61	0.33		0.61	0.33
1.02	0.38		1.02	0.38
0.37	0.1		0.37	0.1
0.34	0.05		0.34	0.05
0.32	0.07		0.32	0.07
0.67	0.22		0.67	0.22
0.75	0.11		0.75	0.11
0.22	-0.1		0.22	0
0.57	0.29		0.57	0.29
0.43	-0.02		0.43	0
0.27	0.02		0.27	0.02
0.25	0.01		0.25	0.01
0.16	-0.14		0.16	0
2.53	0.32		2.53	0.32
0.4	0.02		0.4	0.02
0.27	-0.03		0.27	0
2.05	0.24		2.05	0.24
3.26	-0.18		3.26	0
4.46	1.7		4.46	1.7
7.43	1.4		7.43	1.4
2.8	-0.08		2.8	0
4.06	-1.37		4.06	0
2.03	-0.53		2.03	0
3.25	0.27		3.25	0.27
2.57	-0.26		2.57	0
4.78	-1.56		4.78	0
4.3	0.66		4.3	0.66
14.11	9.8		14.11	9.8
2.9	-1.4		2.9	0
0.99	-0.08		0.99	0
2.73	-0.2		2.73	0
1.71	-0.25		1.71	0
2.68	-0.29		2.68	0
2.21	-0.56		2.21	0
8.31	5.8		8.31	5.8
2.51	1.11		2.51	1.11
1.37	0.08		1.37	0.08
1.87	-0.34		1.87	0
0.86	0.04		0.86	0.04
4.33	2.44		4.33	2.44
6.06	4.94		6.06	4.94
1.76	0.31		1.76	0.31
2.81	1.14		2.81	1.14
2.07	-0.07		2.07	0
4.49	2.85		4.49	2.85
1.4	0.26		1.4	0.26
0.9	-0.05		0.9	0
1.03	-0.04		1.03	0
1.21	-0.26		1.21	0
2.94	-1.4		2.94	0
4.48	2.53		4.48	2.53
2.26	0.3		2.26	0.3
2.23	-0.07		2.23	0
1.93	0.11		1.93	0.11
1.81	-0.04		1.81	0
1.81	0.15		1.81	0.15
2.37	0.11		2.37	0.11
2.82	-0.23		2.82	0
15.29	13.43		15.29	13.43
10.19	3.34		10.19	3.34
3.1	0.19		3.1	0.19
1.66	-0.19		1.66	0
1.02	-0.04		1.02	0
1.79	0.21		1.79	0.21
1.15	0.28		1.15	0.28
1.52	-0.09		1.52	0
2.38	-0.17		2.38	0
1.84	0.22		1.84	0.22
1.41	-0.07		1.41	0
1.86	-0.3		1.86	0
5.97	-0.14		5.97	0
1.75	-0.11		1.75	0
3.55	1.46		3.55	1.46
1.41	-0.06		1.41	0
2.71	0.37		2.71	0.37
1.96	0.01		1.96	0.01
4.03	1.53		4.03	1.53
3.45	0.76		3.45	0.76
3.75	0.89		3.75	0.89
1.91	-0.05		1.91	0
2.77	0.21		2.77	0.21
1.7	0.18		1.7	0.18
2.26	2.33		2.26	2.33
6.43	2.29		6.43	2.29
3.18	0.37		3.18	0.37
2.11	0.23		2.11	0.23
2.87	0.08		2.87	0.08
2.78	0.11		2.78	0.11
1.9	-0.01		1.9	0
1.58	0.01		1.58	0.01
0.75	-0.04		0.75	0
2.92	1.33		2.92	1.33
1.21	0.08		1.21	0.08
4.8	2.96		4.8	2.96
2.18	0.88		2.18	0.88
7.65	4.9		7.65	4.9
2.5	0.01		2.5	0.01
3.69	1.98		3.69	1.98
2.63	1.33		2.63	1.33
1.46	0.19		1.46	0.19
1.87	0.06		1.87	0.06
1.47	-0.05		1.47	0
1.97	0.34		1.97	0.34
2.25	0.88		2.25	0.88
3.9	0.21		3.9	0.21
2.31	0.51		2.31	0.51
1.57	-0.02		1.57	0
0.88	-0.17		0.88	0
1.13	0.03		1.13	0.03
2.64	-0.07		2.64	0
1.45	0.12		1.45	0.12
0.83	-0.01		0.83	0
1.48	-0.13		1.48	0
1.64	0.07		1.64	0.07
1.19	-0.09		1.19	0
1.56	-0.07		1.56	0
1.1	-0.12		1.1	0
2.73	0.25		2.73	0.25
0.9	-0.36		0.9	0
1.58	0.06		1.58	0.06
1.1	0.04		1.1	0.04
1.07	-0.04		1.07	0
1.43	0.03		1.43	0.03
1.51	0.16		1.51	0.16
0.68	0.02		0.68	0.02
1.37	-0.05		1.37	0
1.14	-0.17		1.14	0
1.37	-0.1		1.37	0
8.09	7.08		8.09	7.08
1.14	-0.21		1.14	0
2.19	0.54		2.19	0.54
0.92	0.03		0.92	0.03
1.14	-0.19		1.14	0
1.14	-0.08		1.14	0
1.15	0.17		1.15	0.17
0.72	-0.08		0.72	0
2.47	0.02		2.47	0.02
1.97	0.14		1.97	0.14
1.73	0.28		1.73	0.28
2.74	1.07		2.74	1.07
1.38	-0.09		1.38	0
8.52	5.78		8.52	5.78
1.82	1.84		1.82	1.84
5.41	3.31		5.41	3.31
1.07	0.09		1.07	0.09
1.41	0.2		1.41	0.2
3.82	2.61		3.82	2.61
1.05	0.52		1.05	0.52
1.7	0.09		1.7	0.09
1.12	0.06		1.12	0.06
1.38	0.19		1.38	0.19
1.26	-0.18		1.26	0
4.92	1.75		4.92	1.75
1.55	0.03		1.55	0.03
3.03	2.12		3.03	2.12
0.27	-0.9		0.27	0
1.49	0.21		1.49	0.21
0.68	-0.45		0.68	0
2	0.07		2	0.07
0.61	-0.27		0.61	0
0.72	0		0.72	0
0.91	-0.05		0.91	0
1.39	0.13		1.39	0.13
0.84	0.02		0.84	0.02
1.15	0.06		1.15	0.06
1.17	0.46		1.17	0.46
1.67	0.67		1.67	0.67
0.35	-0.26		0.35	0
0.74	-0.67		0.74	0
1.48	-0.12		1.48	0
10.44	8.46		10.44	8.46
1.4	-0.31		1.4	0
6.02	4.74		6.02	4.74
0.92	-0.4		0.92	0
0.82	-0.06		0.82	0
5.13	0.96		5.13	0.96
0.6	0.03		0.6	0.03
1.29	0.18		1.29	0.18
0.72	0		0.72	0
0.91	-0.05		0.91	0
1.39	0.13		1.39	0.13
0.84	0.02		0.84	0.02
1.15	0.06		1.15	0.06
1.17	0.46		1.17	0.46
1.67	0.67		1.67	0.67
0.35	-0.26		0.35	0
0.74	-0.67		0.74	0
1.48	-0.12		1.48	0
10.44	8.46		10.44	8.46
1.4	-0.31		1.4	0
6.02	4.74		6.02	4.74
0.92	-0.4		0.92	0
0.82	-0.06		0.82	0
5.13	0.96		5.13	0.96
0.6	0.03		0.6	0.03
1.29	0.18		1.29	0.18
0.97	0.04		0.97	0.04
1.1	-0.05		1.1	0
0.94	0.03		0.94	0.03
0.85	0.08		0.85	0.08
1.6	0.1		1.6	0.1
2.1	0.33		2.1	0.33
0.92	0.03		0.92	0.03
1.04	0.05		1.04	0.05
0.87	0.12		0.87	0.12
2.18	1.47		2.18	1.47
1.07	0.06		1.07	0.06
1.42	0.18		1.42	0.18
1.23	0.37		1.23	0.37
0.75	0.04		0.75	0.04
0.71	0.04		0.71	0.04
1.63	0.23		1.63	0.23
2.21	1.14		2.21	1.14
1.06	-0.1		1.06	0
0.87	-0.04		0.87	0
0.51	-0.02		0.51	0
0.94	-0.12		0.94	0
1.13	0.11		1.13	0.11
0.72	-0.02		0.72	0
1.29	0.01		1.29	0.01
1.34	0.38		1.34	0.38
1.11	0.44		1.11	0.44
0.91	0.11		0.91	0.11
0.68	-0.21		0.68	0
0.74	0.08		0.74	0.08
0.65	0.05		0.65	0.05
1.29	-0.04		1.29	0
1.15	0.05		1.15	0.05
0.66	0.1		0.66	0.1
0.57	0.09		0.57	0.09
1.2	0.09		1.2	0.09
0.92	0.17		0.92	0.17
1	-0.26		1	0
1.33	0.33		1.33	0.33
1.84	0.16		1.84	0.16
0.94	-0.08		0.94	0
2.75	1.7		2.75	1.7
2.31	0.74		2.31	0.74
1.96	-0.1		1.96	0
1.78	-0.14		1.78	0
1.48	-0.16		1.48	0
0.38	0.05		0.38	0.05
2.8	2.14		2.8	2.14
0.78	0.07		0.78	0.07
1.77	-0.21		1.77	0
1.64	0.86		1.64	0.86
4.04	2.27		4.04	2.27
3.83	2.09		3.83	2.09
2.35	-0.03		2.35	0
2.34	-0.23		2.34	0
0.97	0.18		0.97	0.18
1.27	0.63		1.27	0.63
0.7	-0.06		0.7	0
1.93	0.61		1.93	0.61
0.72	-0.04		0.72	0
1.62	0.32		1.62	0.32
1.65	0.1		1.65	0.1
1.12	0.08		1.12	0.08
1.1	-0.23		1.1	0
0.51	-0.09		0.51	0
0.74	-0.11		0.74	0
1.56	-0.2		1.56	0
1.75	-0.06		1.75	0
0.74	-0.13		0.74	0
0.89	-0.05		0.89	0
0.76	-0.03		0.76	0
0.82	0.24		0.82	0.24
0.74	-0.1		0.74	0
1.42	-0.1		1.42	0
9.42	7.77		9.42	7.77
1.85	-0.63		1.85	0
1.67	-0.04		1.67	0
1.35	0.01		1.35	0.01
2.3	0.71		2.3	0.71
1.84	0.03		1.84	0.03
1.3	-0.02		1.3	0
1.82	-0.13		1.82	0
4.33	2.69		4.33	2.69
1.48	-0.06		1.48	0
0.99	-0.21		0.99	0
1.19	-0.13		1.19	0
1.15	-0.51		1.15	0
0.41	-0.68		0.41	0
1.09	0.15		1.09	0.15
4.33	2.97		4.33	2.97
0.99	-0.26		0.99	0
0.42	-0.05		0.42	0
1.05	0.08		1.05	0.08
12.48	10.93		12.48	10.93
1.31	-0.03		1.31	0
0.79	-0.23		0.79	0
1.28	-0.01		1.28	0
1.01	0		1.01	0
1.09	0.15		1.09	0.15
3.48	2.51		3.48	2.51
5.78	4.34		5.78	4.34
1.15	0.11		1.15	0.11
0.69	0.06		0.69	0.06
0.78	0.08		0.78	0.08
6.43	4.79		6.43	4.79
0.79	-0.3		0.79	0
1.06	0.28		1.06	0.28
1.03	0.23		1.03	0.23
0.88	0.28		0.88	0.28
2.08	0.97		2.08	0.97
0.78	0.05		0.78	0.05
1.78	0.64		1.78	0.64
1.26	-0.17		1.26	0
2.8	1.54		2.8	1.54
1.47	0.5		1.47	0.5
0.74	0.02		0.74	0.02
0.93	-0.05		0.93	0
0.49	-0.08		0.49	0
4.03	2.7		4.03	2.7
0.54	0.01		0.54	0.01
0.98	-0.02		0.98	0
0.94	0.03		0.94	0.03
1.02	0.18		1.02	0.18
0.91	-0.02		0.91	0
0.58	0.14		0.58	0.14
1.2	0.72		1.2	0.72
0.88	-0.05		0.88	0
1.05	-0.08		1.05	0
2.86	1.25		2.86	1.25
0.8	0.05		0.8	0.05
0.95	0.09		0.95	0.09
1.06	0.22		1.06	0.22
0.93	-0.08		0.93	0
0.64	0.09		0.64	0.09
0.77	-0.02		0.77	0
0.46	0		0.46	0
1.42	-0.04		1.42	0
1.3	0.24		1.3	0.24
0.91	-0.03		0.91	0
1.75	0.26		1.75	0.26
0.41	-0.03		0.41	0
1.21	0.09		1.21	0.09
0.67	0.04		0.67	0.04
1	0.18		1	0.18
0.58	0		0.58	0
1.88	1.31		1.88	1.31
0.99	0.16		0.99	0.16
1.87	0.85		1.87	0.85
0.76	-0.06		0.76	0
0.96	-0.03		0.96	0
2.01	-0.58		2.01	0
1.06	0.24		1.06	0.24
0.66	-0.55		0.66	0
3.61	-0.04		3.61	0
2.08	0.6		2.08	0.6
2.8	1.52		2.8	1.52
3.59	2.07		3.59	2.07
0.64	-0.02		0.64	0
1.33	0.48		1.33	0.48
1.61	0.28		1.61	0.28
0.96	0.18		0.96	0.18
1.22	0.34		1.22	0.34
0.93	0.09		0.93	0.09
3.71	2.75		3.71	2.75
0.85	0.01		0.85	0.01
1.63	-0.21		1.63	0
2.64	1.18		2.64	1.18
0.77	-0.03		0.77	0
1.57	0.24		1.57	0.24
2.41	0.9		2.41	0.9
0.89	-0.13		0.89	0
1.65	0.03		1.65	0.03
1.4	-0.34		1.4	0
1.14	-0.08		1.14	0
1.1	-0.08		1.1	0
1.08	-0.02		1.08	0
1.59	-0.14		1.59	0
1.34	0.04		1.34	0.04
1.43	-0.01		1.43	0
1.37	0.62		1.37	0.62
0.68	-2.58		0.68	0
0.81	0.01		0.81	0.01
0.97	-0.03		0.97	0
1.99	0.3		1.99	0.3
0.93	-0.32		0.93	0
1.13	-0.09		1.13	0
0.88	0.03		0.88	0.03
0.6	-0.05		0.6	0
2.32	0.95		2.32	0.95
1.55	0.54		1.55	0.54
1.09	0.12		1.09	0.12
1.22	-0.02		1.22	0
1.71	0.17		1.71	0.17
0.6	-0.11		0.6	0
0.5	0.02		0.5	0.02
1.5	0.23		1.5	0.23
1.21	-0.16		1.21	0
1.55	0.57		1.55	0.57
1.1	-0.1		1.1	0
1.31	0.06		1.31	0.06
1.01	0.03		1.01	0.03
0.58	-0.01		0.58	0
1.47	0.26		1.47	0.26
1.48	-0.12		1.48	0
0.81	-0.06		0.81	0
1.78	0.34		1.78	0.34
2.29	0.63		2.29	0.63
0.88	0		0.88	0
1.29	0.08		1.29	0.08
1.19	0.34		1.19	0.34
1.5	0.26		1.5	0.26
1.5	-0.13		1.5	0
0.93	0.02		0.93	0.02
0.93	0.17		0.93	0.17
1	0.2		1	0.2
0.76	-0.04		0.76	0
2.92	0.05		2.92	0.05
0.45	-0.24		0.45	0
1.51	-0.53		1.51	0
1	-0.06		1	0
1.1	0.17		1.1	0.17
0.58	-0.35		0.58	0
0.93	-0.35		0.93	0
1.31	-0.04		1.31	0
0.99	0.07		0.99	0.07
7.4	5.36		7.4	5.36
1.79	0.27		1.79	0.27
1.57	0.02		1.57	0.02
2.46	0.33		2.46	0.33
1.48	0.46		1.48	0.46
1.82	-0.13		1.82	0
0.69	-0.07		0.69	0
1.46	0.04		1.46	0.04
0.54	-0.22		0.54	0
0.83	-0.32		0.83	0
0.71	0.09		0.71	0.09
0.62	0.11		0.62	0.11
3.35	2.37		3.35	2.37
2.07	1.74		2.07	1.74
2.83	1.98		2.83	1.98
3.16	0.91		3.16	0.91
4.17	0.3		4.17	0.3
4.49	3.64		4.49	3.64
0.8	0.08		0.8	0.08
1.1	-0.25		1.1	0
0.61	0.1		0.61	0.1
1.12	0.25		1.12	0.25
0.78	0.03		0.78	0.03
1.25	-0.05		1.25	0
1.44	0.68		1.44	0.68
1.08	-0.11		1.08	0
2.51	1.42		2.51	1.42
1.09	0		1.09	0
7.55	5.56		7.55	5.56
0.95	-0.06		0.95	0
2.63	0.81		2.63	0.81
2.63	0.04		2.63	0.04
3.46	0.11		3.46	0.11
3.89	2.33		3.89	2.33
3.05	0.88		3.05	0.88
1.5	0.05		1.5	0.05
1.02	-0.11		1.02	0
0.81	-0.04		0.81	0
1.31	0.24		1.31	0.24
1.13	0.09		1.13	0.09
2.37	0.15		2.37	0.15
0.81	0.08		0.81	0.08
2.33	0.33		2.33	0.33
1.51	0.02		1.51	0.02
2	0.38		2	0.38
1.28	-0.06		1.28	0
1.56	0.02		1.56	0.02
1.27	-0.16		1.27	0
11.4	7.2		11.4	7.2
10.53	5.46		10.53	5.46
0.63	-0.07		0.63	0
0.92	0.03		0.92	0.03
1.26	-0.12		1.26	0
0.76	-0.08		0.76	0
1.1	-0.1		1.1	0
1.32	-0.11		1.32	0
1.54	0.57		1.54	0.57
0.85	-0.52		0.85	0
1.49	0.06		1.49	0.06
2.25	0.36		2.25	0.36
1.43	0.11		1.43	0.11
1.46	-0.16		1.46	0
0.59	-0.02		0.59	0
2.1	1.14		2.1	1.14
0.75	0.05		0.75	0.05
1.7	0.02		1.7	0.02
0.86	0.08		0.86	0.08
1.29	0.22		1.29	0.22
0.24	0.04		0.24	0.04
1.25	0.05		1.25	0.05
1.41	-0.06		1.41	0
1.45	-0.08		1.45	0
1.62	0.79		1.62	0.79
1.32	-0.12		1.32	0
0.6	-0.05		0.6	0
0.67	0.01		0.67	0.01
0.72	0.04		0.72	0.04
0.75	-0.19		0.75	0
1.2	-0.27		1.2	0
1.95	0.42		1.95	0.42
1.3	-0.01		1.3	0
0.61	-0.13		0.61	0
1.47	-0.19		1.47	0
1.68	0.36		1.68	0.36
0.83	0		0.83	0
0.76	0		0.76	0
2.1	0.34		2.1	0.34
1.74	-0.52		1.74	0
2.39	0.55		2.39	0.55
0.91	-0.3		0.91	0
3.93	1.9		3.93	1.9
2.32	-0.54		2.32	0
1.98	0.08		1.98	0.08
1.54	0.38		1.54	0.38
0.93	-0.14		0.93	0
0.85	-0.2		0.85	0
1.23	0.06		1.23	0.06
0.75	0.07		0.75	0.07
0.84	-0.02		0.84	0
3.62	2.11		3.62	2.11
1.3	0.01		1.3	0.01
0.78	0		0.78	0
2.67	1.84		2.67	1.84
1.57	-0.33		1.57	0
0.94	0.17		0.94	0.17
1.79	0.18		1.79	0.18
0.8	0.53		0.8	0.53
1.84	0.65		1.84	0.65
0.93	0.21		0.93	0.21
1.25	-0.44		1.25	0
2.17	-0.1		2.17	0
0.71	0.01		0.71	0.01
1.8	-0.56		1.8	0
0.43	-0.06		0.43	0
1.53	0.31		1.53	0.31
1.64	0.05		1.64	0.05
2.24	0.99		2.24	0.99
0.63	0		0.63	0
1.27	0.36		1.27	0.36
1.35	0.31		1.35	0.31
1.81	-0.15		1.81	0
4.52	-1.55		4.52	0
1.01	0.25		1.01	0.25
1.21	0.17		1.21	0.17
5.55	4.55		5.55	4.55
2.41	1.06		2.41	1.06
0.83	0.07		0.83	0.07
2.21	1.26		2.21	1.26
6.23	5.47		6.23	5.47
1.25	0.4		1.25	0.4
1.92	0.93		1.92	0.93
1.69	0.61		1.69	0.61
1.45	0.39		1.45	0.39
0.67	-0.07		0.67	0
2.33	0.65		2.33	0.65
1.2	0.03		1.2	0.03
1.37	0.34		1.37	0.34
1.3	0.25		1.3	0.25
1.98	0.17		1.98	0.17
1.83	0.33		1.83	0.33
2.93	1.73		2.93	1.73
1.88	0.06		1.88	0.06
0.62	0.01		0.62	0.01
1.57	0.22		1.57	0.22
3.84	2.54		3.84	2.54
1.11	0.04		1.11	0.04
1.27	0.36		1.27	0.36
3.85	1.68		3.85	1.68
1.14	0.09		1.14	0.09
1.63	0.61		1.63	0.61
0.95	0.12		0.95	0.12
0.91	0.17		0.91	0.17
1.26	-0.05		1.26	0
1.27	0.13		1.27	0.13
0.89	0.17		0.89	0.17
2.75	-0.05		2.75	0
1.28	-0.07		1.28	0
0.75	0.08		0.75	0.08
1.28	0.6		1.28	0.6
1.84	0.09		1.84	0.09
0.84	0.04		0.84	0.04
1.71	0.18		1.71	0.18
2.21	-1.08		2.21	0
3.04	1.25		3.04	1.25
1.23	0.18		1.23	0.18
1.13	0.5		1.13	0.5
1.15	0.41		1.15	0.41
1.05	0.04		1.05	0.04
1.63	0.72		1.63	0.72
0.81	0.02		0.81	0.02
1.73	-0.26		1.73	0
0.83	1.19		0.83	1.19
0.64	0.15		0.64	0.15
0.47	-0.16		0.47	0
0.55	0.03		0.55	0.03
1.28	-0.03		1.28	0
2.39	1.34		2.39	1.34
0.8	0.04		0.8	0.04
1.04	0.09		1.04	0.09
0.81	0.11		0.81	0.11
1.84	0.84		1.84	0.84
0.27	0.03		0.27	0.03
11.39	0.85		11.39	0.85
2.06	1.01		2.06	1.01
1.19	-0.02		1.19	0
1.55	0.22		1.55	0.22
0.85	0.14		0.85	0.14
1.48	0.21		1.48	0.21
0.91	0.2		0.91	0.2
1.18	0.22		1.18	0.22
0.85	-0.62		0.85	0
1.41	0.04		1.41	0.04
0.52	-0.01		0.52	0
2.22	0.67		2.22	0.67
1.1	0.53		1.1	0.53
1.19	0.3		1.19	0.3
0.8	0.35		0.8	0.35
1.17	0.34		1.17	0.34
0.48	0.07		0.48	0.07
0.41	-0.02		0.41	0
1.19	0.1		1.19	0.1
0.66	0.01		0.66	0.01
1.58	0.6		1.58	0.6
1.32	0.02		1.32	0.02
0.51	0.01		0.51	0.01
1.74	0.46		1.74	0.46
0.7	0.01		0.7	0.01
1.72	1.12		1.72	1.12
0.87	0.09		0.87	0.09
0.98	0.01		0.98	0.01
0.79	0.03		0.79	0.03
0.69	-0.06		0.69	0
1.1	0.04		1.1	0.04
0.82	-0.01		0.82	0
1.16	0.08		1.16	0.08
1.04	0.11		1.04	0.11
1.11	-0.02		1.11	0
0.75	0.23		0.75	0.23
0.8	0.08		0.8	0.08
1.15	0.24		1.15	0.24
1.08	-0.08		1.08	0
1.56	0.6		1.56	0.6
1.45	0.05		1.45	0.05
0.7	0.05		0.7	0.05
0.71	0.08		0.71	0.08
0.43	-0.01		0.43	0
1.69	-0.05		1.69	0
1.83	0.13		1.83	0.13
1.01	0.09		1.01	0.09
1.39	0.1		1.39	0.1
1.28	0		1.28	0
1.06	0.02		1.06	0.02
0.78	-0.08		0.78	0
1.16	-0.09		1.16	0
4.88	2.54		4.88	2.54
0.93	-0.09		0.93	0
2.55	0.12		2.55	0.12
0.68	0.13		0.68	0.13
0.92	-0.56		0.92	0
1.43	0.4		1.43	0.4
1.02	-0.36		1.02	0
0.78	0.03		0.78	0.03
1.67	0.48		1.67	0.48
7.17	0.17		7.17	0.17
1.95	-0.09		1.95	0
0.53	-0.01		0.53	0
1.13	-0.06		1.13	0
3.58	2.4		3.58	2.4
0.61	-0.03		0.61	0
1.62	0.08		1.62	0.08
1.9	0.38		1.9	0.38
0.99	-0.26		0.99	0
1.73	-0.36		1.73	0
2.26	-0.25		2.26	0
0.9	0		0.9	0
0.74	-0.06		0.74	0
2.01	-0.36		2.01	0
0.91	-0.01		0.91	0
0.67	-0.03		0.67	0
2.01	-0.48		2.01	0
5.49	-0.16		5.49	0
2.01	0.89		2.01	0.89
3.24	1.64		3.24	1.64
0.66	-0.22		0.66	0
1.41	-0.23		1.41	0
2.12	0.7		2.12	0.7
1.08	-0.13		1.08	0
0.92	-0.13		0.92	0
1.47	-0.04		1.47	0
1.09	-0.1		1.09	0
3.1	1.48		3.1	1.48
2.2	0.64		2.2	0.64
2.61	0.6		2.61	0.6
2.14	0.34		2.14	0.34
1.81	0.49		1.81	0.49
1.41	-0.26		1.41	0
3.5	2.45		3.5	2.45
0.94	0.08		0.94	0.08
0.81	-0.11		0.81	0
1.09	-0.09		1.09	0
0.85	0.01		0.85	0.01
2.37	0.85		2.37	0.85
1.46	0.06		1.46	0.06
1.05	0.05		1.05	0.05
3.89	2.58		3.89	2.58
1.53	0.05		1.53	0.05
0.8	0.1		0.8	0.1
1.27	0.23		1.27	0.23
2.53	1.32		2.53	1.32
0.7	0.13		0.7	0.13
0.98	0.11		0.98	0.11
0.48	0.03		0.48	0.03
0.63	-0.14		0.63	0
0.53	0.08		0.53	0.08
0.75	0.03		0.75	0.03
3.15	0.22		3.15	0.22
2.22	0.03		2.22	0.03
1.11	0.3		1.11	0.3
1.35	0.07		1.35	0.07
0.84	0.09		0.84	0.09
1.82	-0.01		1.82	0
0.55	0		0.55	0
2.04	0.24		2.04	0.24
4.46	3.77		4.46	3.77
1.38	0.43		1.38	0.43
1.32	0.5		1.32	0.5
3.38	-0.07		3.38	0
0.59	-0.03		0.59	0
0.83	0.18		0.83	0.18
1.29	0.09		1.29	0.09
0.8	-0.01		0.8	0
1.49	0.51		1.49	0.51
1.61	0.45		1.61	0.45
2.12	0.81		2.12	0.81
0.77	-0.01		0.77	0
0.82	-0.04		0.82	0
0.88	0.51		0.88	0.51
1.23	0.09		1.23	0.09
9.24	-0.96		9.24	0
3	0.11		3	0.11
2.49	1.07		2.49	1.07
1.37	-0.07		1.37	0
0.54	0.11		0.54	0.11
0.95	-0.41		0.95	0
0.97	0.52		0.97	0.52
1.16	0.03		1.16	0.03
0.97	0.22		0.97	0.22
0.88	0		0.88	0
1.08	0.31		1.08	0.31
1.11	-0.16		1.11	0
1.44	0.13		1.44	0.13
0.71	-0.02		0.71	0
1.94	0.53		1.94	0.53
0.65	-0.23		0.65	0
2.92	1.48		2.92	1.48
1.66	0.22		1.66	0.22
2.78	1.92		2.78	1.92
0.98	-0.03		0.98	0
1.19	-0.02		1.19	0
10.87	8.01		10.87	8.01
2.5	1.21		2.5	1.21
1.9	0.53		1.9	0.53
2.61	0.1		2.61	0.1
0.84	0.22		0.84	0.22
0.92	0.24		0.92	0.24
1.56	0.2		1.56	0.2
1.13	0.34		1.13	0.34
1.16	0.03		1.16	0.03
1.5	1.17		1.5	1.17
0.9	0.13		0.9	0.13
0.84	-0.04		0.84	0
1.22	0.15		1.22	0.15
1.22	-0.13		1.22	0
1.1	0.03		1.1	0.03
1.71	0.1		1.71	0.1
0.59	0.1		0.59	0.1
1.53	0.26		1.53	0.26
1.2	-0.03		1.2	0
1.22	0.06		1.22	0.06
0.96	-0.19		0.96	0
0.84	-0.15		0.84	0
0.82	-0.07		0.82	0
1.86	0.78		1.86	0.78
1.51	-0.04		1.51	0
0.96	0.03		0.96	0.03
0.7	0.03		0.7	0.03
2.42	0.64		2.42	0.64
1.94	0.89		1.94	0.89
1.3	0.05		1.3	0.05
1.35	-0.1		1.35	0
1.54	0.92		1.54	0.92
1.66	-0.08		1.66	0
1.05	-0.03		1.05	0
2.89	-0.51		2.89	0
2.1	0.31		2.1	0.31
0.73	0.04		0.73	0.04
1.28	0.85		1.28	0.85
5.56	-0.32		5.56	0
0.72	-0.1		0.72	0
5.37	0.3		5.37	0.3
1.66	0.2		1.66	0.2
1.64	0.07		1.64	0.07
1.19	0.13		1.19	0.13
0.99	-0.03		0.99	0
0.66	-0.13		0.66	0
0.8	0.05		0.8	0.05
0.56	-0.08		0.56	0
1.55	0.93		1.55	0.93
2.79	0.4		2.79	0.4
0.71	-0.02		0.71	0
0.87	-0.11		0.87	0
0.79	-0.09		0.79	0
2.19	0.1		2.19	0.1
1.01	-0.11		1.01	0
2.67	0.24		2.67	0.24
2.15	0.65		2.15	0.65
0.46	0.43		0.46	0.43
2.62	0		2.62	0
1.58	-0.06		1.58	0
0.9	0.05		0.9	0.05
1.12	0.05		1.12	0.05
1.26	0.05		1.26	0.05
0.92	-0.07		0.92	0
1.72	-0.47		1.72	0
1.13	0.04		1.13	0.04
0.91	0.08		0.91	0.08
2.38	1.05		2.38	1.05
0.73	0.05		0.73	0.05
6.15	2.05		6.15	2.05
0.73	0.07		0.73	0.07
1.44	0.3		1.44	0.3
1.05	0.24		1.05	0.24
0.76	-0.03		0.76	0
3.98	3.17		3.98	3.17
0.58	-0.09		0.58	0
1.41	0.02		1.41	0.02
1.27	0.05		1.27	0.05
0.84	0.19		0.84	0.19
4.34	3.96		4.34	3.96
1.97	-0.05		1.97	0
1.5	0.19		1.5	0.19
4.28	2.48		4.28	2.48
1.62	0.16		1.62	0.16
0.74	-0.02		0.74	0
0.88	0.01		0.88	0.01
1.1	-0.02		1.1	0
2.45	1.26		2.45	1.26
0.99	-0.04		0.99	0
1.7	0.53		1.7	0.53
2.64	-0.06		2.64	0
1.24	0.46		1.24	0.46
1.61	-0.3		1.61	0
1.22	-0.07		1.22	0
2.41	0.13		2.41	0.13
1.48	-0.05		1.48	0
0.73	0.14		0.73	0.14
1.57	0.37		1.57	0.37
0.54	0.04		0.54	0.04
0.66	-0.13		0.66	0
1.35	-0.11		1.35	0
1.13	0.29		1.13	0.29
1.26	0.09		1.26	0.09
3.73	2.75		3.73	2.75
1.68	0.13		1.68	0.13
1.11	0.35		1.11	0.35
1.27	0.18		1.27	0.18
1.16	0.35		1.16	0.35
0.58	-0.04		0.58	0
1.4	0.19		1.4	0.19
0.85	0.18		0.85	0.18
1.57	-0.03		1.57	0
1.12	0.35		1.12	0.35
0.76	-0.01		0.76	0
1.46	-0.12		1.46	0
1.64	0.83		1.64	0.83
7.36	6.01		7.36	6.01
0.82	0.08		0.82	0.08
0.62	0.11		0.62	0.11
2.67	0.6		2.67	0.6
0.87	-0.01		0.87	0
0.7	-0.08		0.7	0
5.64	4.06		5.64	4.06
1.32	-0.06		1.32	0
5.73	4.28		5.73	4.28
2.17	1.01		2.17	1.01
1.63	0.24		1.63	0.24
1.48	0.91		1.48	0.91
1.75	0.66		1.75	0.66
1.13	0.19		1.13	0.19
1.56	-0.18		1.56	0
1.26	0.21		1.26	0.21
1.14	-0.07		1.14	0
1.67	0.08		1.67	0.08
1.59	0.09		1.59	0.09
2.29	0.12		2.29	0.12
1.27	0.06		1.27	0.06
0.76	0		0.76	0
1.26	0.17		1.26	0.17
1.01	-0.05		1.01	0
1.95	0.69		1.95	0.69
1.74	0.69		1.74	0.69
1.5	0.31		1.5	0.31
0.61	-0.15		0.61	0
0.52	-0.1		0.52	0
0.93	-0.05		0.93	0
1.02	0		1.02	0
1.34	0.04		1.34	0.04
1.01	0.12		1.01	0.12
0.96	0.12		0.96	0.12
0.59	0.1		0.59	0.1
1.09	0.15		1.09	0.15
1.41	0.4		1.41	0.4
1.61	0.4		1.61	0.4
0.75	-0.08		0.75	0
4.47	1.2		4.47	1.2
0.9	-0.15		0.9	0
1.13	0.05		1.13	0.05
1.06	0.12		1.06	0.12
1.07	0.14		1.07	0.14
1.44	0.34		1.44	0.34
1.21	0.35		1.21	0.35
0.75	0.01		0.75	0.01
1.46	0.69		1.46	0.69
0.92	0.05		0.92	0.05
1.57	0.14		1.57	0.14
1.02	0.04		1.02	0.04
0.73	0.06		0.73	0.06
2.32	0.49		2.32	0.49
0.86	0.18		0.86	0.18
0.89	0.14		0.89	0.14
1.47	0.05		1.47	0.05
1.18	0.15		1.18	0.15
0.73	-0.01		0.73	0
1.04	-0.03		1.04	0
0.68	-0.07		0.68	0
1.98	0.84		1.98	0.84
1.18	0.13		1.18	0.13
0.98	0.03		0.98	0.03
1.26	0.14		1.26	0.14
1.29	0.08		1.29	0.08
0.86	-0.02		0.86	0
0.81	-0.04		0.81	0
1.19	0.11		1.19	0.11
1.54	0.21		1.54	0.21
0.96	-0.17		0.96	0
2.16	1.18		2.16	1.18
1.55	0.12		1.55	0.12
0.49	0.03		0.49	0.03
0.94	0.04		0.94	0.04
0.66	0.16		0.66	0.16
0.79	0.1		0.79	0.1
2.39	0.11		2.39	0.11
3.41	0.19		3.41	0.19
0.93	0.03		0.93	0.03
0.79	0.13		0.79	0.13
1.01	0.06		1.01	0.06
0.71	0.04		0.71	0.04
1.16	0.07		1.16	0.07
1.2	0.07		1.2	0.07
0.87	0.12		0.87	0.12
1.84	1.37		1.84	1.37
1.01	0.36		1.01	0.36
0.82	0.05		0.82	0.05
2.75	0.88		2.75	0.88
1.23	0.06		1.23	0.06
2.29	1.15		2.29	1.15
0.75	0.04		0.75	0.04
1.24	0.18		1.24	0.18
1.81	0.24		1.81	0.24
2.02	0.16		2.02	0.16
14.55	11.31		14.55	11.31
1.04	-0.18		1.04	0
1.89	0.65		1.89	0.65
1.15	-0.03		1.15	0
0.64	0.05		0.64	0.05
1.13	0.04		1.13	0.04
9.51	0.83		9.51	0.83
0.64	-0.25		0.64	0
1.63	-0.13		1.63	0
1.61	0.32		1.61	0.32
0.77	0.1		0.77	0.1
2.55	1.32		2.55	1.32
0.69	-0.52		0.69	0
1.03	0.02		1.03	0.02
2.39	0.82		2.39	0.82
1.86	-0.06		1.86	0
1.04	-0.03		1.04	0
2.67	-0.01		2.67	0
0.88	-0.11		0.88	0
2.75	0.95		2.75	0.95
1.35	0.1		1.35	0.1
2.19	0.17		2.19	0.17
3.42	1.92		3.42	1.92
4.14	3.29		4.14	3.29
1.09	-0.04		1.09	0
1.19	0.1		1.19	0.1
3.07	1.91		3.07	1.91
0.63	-0.01		0.63	0
1.12	-0.14		1.12	0
0.82	0.05		0.82	0.05
1.03	0.08		1.03	0.08
0.54	0.02		0.54	0.02
2.02	-0.35		2.02	0
2.39	-0.02		2.39	0
1.93	0.95		1.93	0.95
1.41	0.61		1.41	0.61
1.61	0.11		1.61	0.11
1.62	0.34		1.62	0.34
1.92	0.04		1.92	0.04
1.2	-0.05		1.2	0
1.15	0.1		1.15	0.1
4.42	0.8		4.42	0.8
0.88	0.11		0.88	0.11
2.09	-0.11		2.09	0
4.55	3.03		4.55	3.03
1.49	0.17		1.49	0.17
0.95	-0.11		0.95	0
3.38	0.03		3.38	0.03
1.09	0.27		1.09	0.27
1.63	0.44		1.63	0.44
1.24	0.03		1.24	0.03
4.35	1.25		4.35	1.25
1.81	-0.03		1.81	0
1.31	0.09		1.31	0.09
2.04	0.34		2.04	0.34
0.98	0.25		0.98	0.25
1.51	0.03		1.51	0.03
1.52	0.59		1.52	0.59
1.56	0.31		1.56	0.31
3.31	0.77		3.31	0.77
1.12	0.25		1.12	0.25
0.93	0.19		0.93	0.19
2.4	1.15		2.4	1.15
1.98	0.47		1.98	0.47
6.08	4.15		6.08	4.15
1.78	0.37		1.78	0.37
1.96	0.18		1.96	0.18
1.15	0.1		1.15	0.1
1.79	0.1		1.79	0.1
2.82	1.33		2.82	1.33
2.42	1.01		2.42	1.01
1.34	-0.02		1.34	0
1.73	0.16		1.73	0.16
1.08	0		1.08	0
1.04	0.11		1.04	0.11
1.5	0.01		1.5	0.01
2.23	0.03		2.23	0.03
0.83	-0.56		0.83	0
1.13	-0.01		1.13	0
0.75	0		0.75	0
1.87	0.45		1.87	0.45
3.43	2.05		3.43	2.05
7.91	4.08		7.91	4.08
1.15	0.05		1.15	0.05
0.85	0.06		0.85	0.06
3.31	0.36		3.31	0.36
3.55	1.39		3.55	1.39
0.93	0.08		0.93	0.08
1.29	0.08		1.29	0.08
2.26	0.15		2.26	0.15
1.41	0.1		1.41	0.1
0.94	-0.05		0.94	0
1.15	0.32		1.15	0.32
1.53	0.1		1.53	0.1
1.22	0.05		1.22	0.05
1.35	-0.02		1.35	0
1.52	0.89		1.52	0.89
1.08	-0.02		1.08	0
0.67	0.04		0.67	0.04
1.83	0.75		1.83	0.75
2.76	0.72		2.76	0.72
0.78	0.04		0.78	0.04
1.33	0.05		1.33	0.05
1.58	0.24		1.58	0.24
2.3	0.2		2.3	0.2
0.79	0.18		0.79	0.18
1.05	0.86		1.05	0.86
1.4	-0.08		1.4	0
1.61	0.03		1.61	0.03
1.28	-0.07		1.28	0
1.06	-0.34		1.06	0
0.79	-0.11		0.79	0
1.47	-0.07		1.47	0
0.55	-0.07		0.55	0
0.05	0.1		0.05	0.1
-0.02	0		0	0
6.47	5.49		6.47	5.49
2.07	0.11		2.07	0.11
3.08	0.39		3.08	0.39
2.78	0.21		2.78	0.21
0.63	-0.23		0.63	0
1.37	0.12		1.37	0.12
1.25	0.9		1.25	0.9
3.17	1.71		3.17	1.71
2.61	0.52		2.61	0.52
1.41	-0.06		1.41	0
1.17	-0.05		1.17	0
1.23	-0.04		1.23	0
0.89	0		0.89	0
1.96	0.08		1.96	0.08
1.53	-0.05		1.53	0
3.85	1.58		3.85	1.58
7.6	0.87		7.6	0.87
1.06	-0.01		1.06	0
2.11	0.34		2.11	0.34
1.09	0.2		1.09	0.2
2.62	1.12		2.62	1.12
0.92	0.07		0.92	0.07
1.22	0.24		1.22	0.24
1.3	0.08		1.3	0.08
1.85	0.03		1.85	0.03
0.81	-0.05		0.81	0
1.14	0.17		1.14	0.17
0.87	-0.15		0.87	0
1.09	-0.03		1.09	0
1.35	0.03		1.35	0.03
0.96	0.1		0.96	0.1
2.32	-0.09		2.32	0
1.24	-0.19		1.24	0
1	0.09		1	0.09
1.41	0.21		1.41	0.21
1.09	0.07		1.09	0.07
1.13	-0.27		1.13	0
1.23	-0.08		1.23	0
2.27	0.47		2.27	0.47
0.88	0.04		0.88	0.04
0.9	0.22		0.9	0.22
1	0.19		1	0.19
0.97	-0.04		0.97	0
1.61	0.27		1.61	0.27
1.16	-0.01		1.16	0
1.11	0.02		1.11	0.02
1.06	0.01		1.06	0.01
0.64	0.07		0.64	0.07
0.36	0.04		0.36	0.04
1.21	0.46		1.21	0.46
1.4	0.42		1.4	0.42
1.88	0.85		1.88	0.85
0.86	-0.01		0.86	0
3.39	2.3		3.39	2.3
1.27	0.16		1.27	0.16
1.17	0.24		1.17	0.24
1.87	0.14		1.87	0.14
1.73	0.03		1.73	0.03
1.55	0.1		1.55	0.1
1.44	-0.04		1.44	0
0.98	-0.34		0.98	0
1.29	-0.02		1.29	0
1.93	0.11		1.93	0.11
3.97	0.85		3.97	0.85
1.31	0.01		1.31	0.01
1.49	0.18		1.49	0.18
2.04	0.02		2.04	0.02
1.1	0.04		1.1	0.04
1.61	0.03		1.61	0.03
1.44	-0.03		1.44	0
1.31	0.09		1.31	0.09
1.5	0.03		1.5	0.03
2.16	-0.23		2.16	0
1.48	0.43		1.48	0.43
1.33	-0.28		1.33	0
1.65	1.25		1.65	1.25
1.12	-0.29		1.12	0
4.85	3.81		4.85	3.81
1.06	0.27		1.06	0.27
1.8	0.1		1.8	0.1
1.93	0.61		1.93	0.61
0.93	0.03		0.93	0.03
1.08	0.09		1.08	0.09
1.65	-0.07		1.65	0
1.77	-0.03		1.77	0
3.31	0.12		3.31	0.12
1.74	-0.05		1.74	0
6.25	4.41		6.25	4.41
0.6	0.03		0.6	0.03
1.03	-0.01		1.03	0
4.65	3.4		4.65	3.4
1.04	-0.08		1.04	0
2.43	0.07		2.43	0.07
0.84	0.05		0.84	0.05
4.91	3.63		4.91	3.63
1.08	0.08		1.08	0.08
1.65	0.9		1.65	0.9
5.32	3.73		5.32	3.73
0.91	0.13		0.91	0.13
0.81	0.03		0.81	0.03
1.38	0.06		1.38	0.06
2.18	1		2.18	1
0.5	-0.1		0.5	0
0.92	0.11		0.92	0.11
2.08	2.19		2.08	2.19
0.69	-0.23		0.69	0
1.68	-0.05		1.68	0
2.03	0.02		2.03	0.02
0.68	-0.04		0.68	0
0.85	-0.12		0.85	0
0.38	-0.18		0.38	0
0.98	0.34		0.98	0.34
5	4.44		5	4.44
2.76	1.35		2.76	1.35
1.09	-0.14		1.09	0
2.65	1.15		2.65	1.15
0.78	-0.06		0.78	0
1.09	0.37		1.09	0.37
0.83	0.17		0.83	0.17
0.84	0.22		0.84	0.22
0.69	-0.03		0.69	0
1.33	0.33		1.33	0.33
0.93	-0.07		0.93	0
0.78	-0.08		0.78	0
0.86	0.21		0.86	0.21
1.5	0.24		1.5	0.24
0.92	-0.07		0.92	0
3.48	0.2		3.48	0.2
1.3	0.02		1.3	0.02
0.58	-0.02		0.58	0
1.71	0.83		1.71	0.83
1.82	0.3		1.82	0.3
2.48	0.87		2.48	0.87
3.98	3.08		3.98	3.08
4.12	-0.24		4.12	0
1.1	-0.13		1.1	0
1.31	0.21		1.31	0.21
1.11	-0.07		1.11	0
4.48	-0.1		4.48	0
1.42	0.2		1.42	0.2
0.75	0.15		0.75	0.15
1.54	0.36		1.54	0.36
11.14	10.13		11.14	10.13
1	0.19		1	0.19
1.55	0.46		1.55	0.46
0.85	-0.12		0.85	0
2.18	-0.03		2.18	0
1.41	-0.41		1.41	0
1	-0.05		1	0
0.71	0.12		0.71	0.12
1.23	0.17		1.23	0.17
1.04	0.38		1.04	0.38
1.49	0.17		1.49	0.17
0.87	0.1		0.87	0.1
1.04	0.26		1.04	0.26
1.64	0.21		1.64	0.21
1.58	0.77		1.58	0.77
0.58	0		0.58	0
1.14	0.13		1.14	0.13
1.44	0.22		1.44	0.22
1.29	0.22		1.29	0.22
1.25	0.1		1.25	0.1
1.39	0.25		1.39	0.25
0.68	0.06		0.68	0.06
1.46	0.15		1.46	0.15
1.88	0.59		1.88	0.59
1.2	0.09		1.2	0.09
1.09	0.33		1.09	0.33
1.79	0.11		1.79	0.11
1.03	0.02		1.03	0.02
1.18	0.04		1.18	0.04
1.31	0.11		1.31	0.11
2.14	0.52		2.14	0.52
1.13	0.02		1.13	0.02
1.22	-0.02		1.22	0
3.05	1.33		3.05	1.33
0.88	-0.05		0.88	0
1.76	-0.06		1.76	0
0.82	0		0.82	0
1.71	0.05		1.71	0.05
2.3	0.41		2.3	0.41
2.08	0.04		2.08	0.04
1.12	0.11		1.12	0.11
1.76	0.2		1.76	0.2
1.15	-0.03		1.15	0
1.23	-0.12		1.23	0
1.35	0.08		1.35	0.08
0.99	0.06		0.99	0.06
1.22	-0.02		1.22	0
2.21	0.49		2.21	0.49
1.29	-0.02		1.29	0
1.47	0.26		1.47	0.26
1.27	0.09		1.27	0.09
0.92	0		0.92	0
1.43	0.09		1.43	0.09
2.7	0.64		2.7	0.64
1.43	0.02		1.43	0.02
1.72	0.55		1.72	0.55
1.85	-0.06		1.85	0
1.4	0.21		1.4	0.21
1.86	0.54		1.86	0.54
0.83	-0.02		0.83	0
2.26	0.51		2.26	0.51
1.23	0.07		1.23	0.07
1.66	0.04		1.66	0.04
1.32	-0.01		1.32	0
1.42	0.06		1.42	0.06
1.06	-0.02		1.06	0
1.73	0.22		1.73	0.22
3.48	0.33		3.48	0.33
1.8	-0.06		1.8	0
1.94	0.16		1.94	0.16
1.78	-0.07		1.78	0
2.15	-0.69		2.15	0
1.64	0.19		1.64	0.19
1.85	-0.03		1.85	0
5.53	2.76		5.53	2.76
1.88	0.01		1.88	0.01
1.23	-0.05		1.23	0
2.04	0.88		2.04	0.88
1	0.03		1	0.03
1.91	0.4		1.91	0.4
1.19	0.28		1.19	0.28
0.89	0		0.89	0
1.21	0.1		1.21	0.1
1.28	-0.01		1.28	0
7.72	5.45		7.72	5.45
1.5	0.07		1.5	0.07
1.99	1.23		1.99	1.23
0.58	-0.01		0.58	0
0.94	-0.07		0.94	0
0.79	0.02		0.79	0.02
1.53	-0.1		1.53	0
1.91	0.2		1.91	0.2
1.09	0.19		1.09	0.19
1.5	-0.06		1.5	0
0.86	-0.07		0.86	0
2.2	0.58		2.2	0.58
2.48	1.05		2.48	1.05
1.6	0.38		1.6	0.38
2.61	1.31		2.61	1.31
1.11	0.05		1.11	0.05
2.97	1.38		2.97	1.38
2.28	0.47		2.28	0.47
1.25	-0.25		1.25	0
1.78	0.27		1.78	0.27
1.69	0.9		1.69	0.9
1.21	0.12		1.21	0.12
1.83	-0.07		1.83	0
0.86	0.08		0.86	0.08
2.15	0.62		2.15	0.62
1.88	0.4		1.88	0.4
3.24	1.49		3.24	1.49
12.82	10.06		12.82	10.06
3.84	-0.19		3.84	0
1.7	0.03		1.7	0.03
1.67	0		1.67	0
3.46	1.9		3.46	1.9
4.82	3.57		4.82	3.57
1.49	0.01		1.49	0.01
1.99	0.43		1.99	0.43
1.22	0.01		1.22	0.01
0.93	0.05		0.93	0.05
5.71	4.61		5.71	4.61
2.09	0.07		2.09	0.07
1.36	0.13		1.36	0.13
1.46	0.02		1.46	0.02
2.86	0.86		2.86	0.86
0.98	0.14		0.98	0.14
1.44	0.07		1.44	0.07
10.98	6.32		10.98	6.32
1.36	0.27		1.36	0.27
3.9	2.46		3.9	2.46
1.22	0.06		1.22	0.06
1.86	0.9		1.86	0.9
0.75	0.03		0.75	0.03
3.52	1.56		3.52	1.56
1.29	0.05		1.29	0.05
1.17	-0.02		1.17	0
1.13	-0.04		1.13	0
1.01	0.13		1.01	0.13
5.75	4.83		5.75	4.83
2.02	1.11		2.02	1.11
1.39	0.51		1.39	0.51
0.99	0.09		0.99	0.09
1.7	0.05		1.7	0.05
0.96	-0.02		0.96	0
1.6	0.52		1.6	0.52
1.47	0.34		1.47	0.34
2.01	0.75		2.01	0.75
1.88	0.62		1.88	0.62

## Sheet: Microarray CRC cases v control
Sialoglycan microarray: Anti-Neu5Gc IgG (RFU) to 31 pairs of Neu5Ac and Neu5Gc-terminated glycans (N=142)
ID	41044155	41050335	41053967	41043816	41045609	41049972	41053994	41075256	41046055	41050719	41053458	41057445	41060879	41051870	41060520	41043414	41061172	41061387	41061707	41061823	41056740	41063867	41063876	41063901	41063974	41065589	41059934	41065409	41065810	41065927	41067158	41074711	41059505	41062859	41082828	41083425	41084095	41087127	41087341	41079609	41083069	41085227	41086208	41086575	41086584	41069236	41074891	41075103	41075318
# 01	0	42.75	0	0	123	0	75	8	23.5	14.25	0	0	0	0	152.25	0	0	0	0	45.25	0	0	0	0	0	0	0	0	0	45.618	13	0	0	0	320.5	0	0	15.25	0	0	0	0	0	0	0	31	0	0	0
# 02	29	109.25	61	0	1927	0	88.5	20	118.25	3165.75	0	0	0	0	14	0	0	81.75	25.5	266.5	0	0	1555.5	111.75	0	237.25	16.5	29	0	0	99.25	307.75	17.25	3.75	512.5	4	0.5	0	0	7.5	630	0	147.5	0	0	50.5	0	0	0
# 03	0	43.75	0	7.75	158	0	30.75	1	0	0.25	0	0	4	0	0	1	0	0	0	229.5	0	0	4.25	0	0	0	0	0	0	9.03235	0	0	11.5	0	248	0	0	0	0	3	21.25	0	37.75	12.75	0	0	0	0	0
# 04	932.25	149.25	46.5	5.25	999.5	0	41	0	131.5	716	0	0	0	0	0	0	0	57.25	4.75	180.25	0	0	2557.75	96.25	0	93.25	0	96.25	0	3.77492	191.5	307.5	23	0	396.75	0	13	0	44.25	76	680.25	0	229	15	0	50.25	0	0	3.25
# 05	0	40	97.75	19.25	93.5	16.5	105.5	11.25	85.25	16	0	10	21.25	19.25	0	0	0	21	0	203.75	0	0	31.5	90.75	98.25	88.5	143	0	0	44.0492	239.25	266.75	18.5	54.75	706.75	16	0	56	268.75	292.25	105.75	0	149.25	105	0	27.5	0	0	32
# 06	392.5	187.25	112.75	62.25	893.5	13.75	123.5	14	154.5	1189.5	31.75	52.75	43.25	0	0	6.75	181	168	99.75	388.25	16.25	61.75	1597.75	438	115.75	361.75	207	201.25	56.25	26.3439	400.75	598.5	50	40.5	1069.75	83.75	102.25	141.25	323.75	372.25	325	11.75	300.25	102.5	0	82.25	0	0	49.25
# 07	0	29.25	0	0	39.5	0	40.75	18.25	59.25	13	13	86.75	16	0	0	0	0	24.75	0	496.5	72.75	0	31.75	0	52.25	0	0	0	0	26.9861	0	0	43	0	499.75	154	0	0	400.25	680.5	228.75	0	59.75	12.75	0	0.25	0	0	39.25
# 08	218.25	97.75	0	0	2334	0	58.75	0	70.75	4063.75	27.75	0	0	0	0	0	0	142	17.25	258.25	101.75	0	4920.75	0	0	283.5	0	52	0	0	90	300.75	37.25	5.5	360	147.75	0	0	157.5	597	1074.5	0	152	0	14.25	0	0	0	15.75
# 09	0	150.25	13.25	0	13.5	76.75	10.75	0	23.75	0	0	111	0	0	0	5.25	0	0	0	129.75	0	0	0	0	31.5	49.75	0	0	0	40.2523	0	0	7.75	0	143.25	0	0	104	66.25	0	110.25	0	0	0	0	10.75	0	0	0
# 10	507.5	94.5	38.75	0	2388.5	0	0	14.5	0	4131.5	0	141.75	0	0	0	13	0	93	0	220.5	0	0	1843.5	0	41	373	0	0	0	12.1929	41.75	240.75	18.5	0	31	11.75	0	80.75	0	0	1075.5	0	2.25	0	0	27	0	39	0
# 11	0	59.75	70.5	0	44	0	25	0	0	0	0	0	0	0	148.5	0	0	0	0	87.25	0	0	22.75	0	0	0	0	0	0	0	0	0	0	0	324.5	0	177.25	0	0	0	0	0	0	0	0	4.25	0	0	0
# 12	136.75	56	46	0	2768.75	0	0	0	0	4375.25	0	0	0	0	150.5	16.25	0	28	0	30.75	0	0	5102.5	0	0	147.75	0	0	0	0	54.25	293.5	6.5	17.5	261	0	0	0	0	0	849.5	0	94.5	0	0	0	0	0	0
# 13	0	37.75	0	0	43.25	0	14	0	59.25	20.5	41	37.75	33.5	0	0	0	0	0	0	284.25	37.5	25.75	58	0	35.25	0	0	0	0	24.4199	0	0	31.75	0	388.25	124	0	0	92.75	316.5	88.75	0	20.25	0	0	3.5	0	0	0
# 14	312	183.75	19.25	6.25	1876.25	0	76.5	29.25	130	3267.75	158	102.75	30	0	30.5	3.25	0	201	99.5	589.75	56.5	70	1317.25	179.5	8	380.5	30.75	135	0	0	187.5	376.25	55.5	0	712.5	109.5	0	0	157.75	503.75	774.75	0	168.75	0	35	54.75	0	0	70.75
# 15	0	243	70.25	12.5	77.75	38.75	17.75	6.5	0	0	0	235.75	4	0	0	8.25	0	0	0	102.5	0	0	5	0	92.75	146.25	0	0	0	7.11805	0	88.25	6.75	0	371	5.75	0	312	202.75	0	305.25	0	0	5.25	0	32.5	0	0	0
# 16	124.5	206.75	6	0	1801.5	0	7.25	0	0	3359.75	0	79.5	0	0	0	0	0	37.25	0	0	0	0	3056	0	37.25	260.5	0	0	0	0	112	270	7.5	0.5	140.5	0	0	119	0	0	730.5	0	61.25	0	0	41.75	0	11.25	0
# 17	0	0	0	0	0	0	0	0	0	0	0	0	0	0	0	0	0	0	0	0	4.25	0	0	0	0	0	0	0	0	0	0	0	0	0	0	0	0	0	0	0	0	0	0	0	0	0	0	0	0
# 18	1520.5	221.5	0	3.25	1365.75	0	3	3.25	7	862	0	0	0	0	15.75	18.75	0	55	0	205.25	0	0	1962	0	0	102.5	0	0	0	21.6949	124.75	456.75	16	0	439.75	0	0	0	0	0	729.25	0	87.5	0	0	30.75	0	0	0
# 19	0	98.75	35	15.25	173	0	50.5	0	208	35	0	0	23.5	0	15.75	0	0	162.75	41.75	157.75	28.5	21	26.5	68.5	0	51.25	0	12	0	6.65207	272.5	126	50.75	2	537.5	32.75	91.75	0	121.5	451.75	162.75	0	220.75	47.5	0	80.25	0	0	29.5
# 20	589	162.75	39.25	34.5	479	0	55.75	3.25	204.25	411	0	0	3.25	0	7.75	8.5	86.25	73.25	0	0	0	0	745.25	402.75	0	35.5	0	0	0	2.94392	579.5	293.5	34.75	0	414.25	41.25	81.5	59.75	122.75	325.25	449	24	832.75	256.75	0.5	192	0	0	57.25
# 21	0	254.25	20.5	0	110.25	428.25	88.5	0	91	36	30	0	159.75	0	1648	27	0	0	31.25	208.5	26.5	0	14	73.25	263.5	0	0	85.5	0	43.7798	121.75	49.5	57.5	0	1702.25	510.75	110.75	0	88.5	51.75	102	0	85.75	150	0	59.75	0	0	10.75
# 22	210.75	205.5	0	0	2599	171	84.75	20	154	3980	0	0	48	0	753.25	16	0	131.25	35.75	208.25	0	0	1979	337.75	176.75	453.5	0	24	0	22.3066	262.75	488.25	47.5	0	1981.75	389.75	25.25	0	0	73.75	993.25	16	150.25	0	0	65.75	0	0	8.5
# 23	0	111.25	147	20.5	206.75	24.5	115.5	0	862	3.25	0	17.75	0	0	0.25	0	30.75	0	0	562.25	55	0	4.25	198.25	178.25	79	200.25	0	0	3.55903	275.75	360.75	7.5	0	836	1.25	36	160.25	1619.5	520.5	340.25	0	136.25	58.25	0	0	0	0	53.5
# 24	1202	146	85	62	1554.5	0	111.5	4.5	86	1842.25	0	0	0	0	0.5	0	113.5	119	0	93	3.25	0	4385.5	360	101	174.25	123.25	122.25	0	4.19325	394.25	547	30.25	0	564.5	7.5	71	200.75	260.75	339.5	512.25	26.25	326.5	97.5	0	54.25	0	0	25.5
# 25	0	22.25	0	0	31.5	38	0	16.25	4.5	37.75	0	0	82	0	4.25	0	0	225.75	0	436.25	6	0	78.5	0	0	30.75	0	4.75	0	21.4223	43.5	167.5	11	0	674.75	3684.5	0	0	0	0	0	8.25	78	0	0	26.75	0	0	0
# 26	388.25	173.5	34.25	36.75	2086	0	37	0	144.5	3499.5	0	0	23.5	0	17.25	0	0	186.5	23.75	558.25	5.5	0	1695.5	375.25	4.5	343	40	136	0	0	359	571.5	30.5	7.75	565.5	93	0	0	31	61.75	666	0	302.25	0	0	63	0	0	43.5
# 27	362	295	353.25	92	157.5	487.75	51.5	28	280.75	15.25	0	0	25.75	0	3.75	17.25	0	31	74.25	536	0	0	18.75	0	0	0	0	0	0	13.0735	218	3.75	91.5	28.25	966.25	49.5	614.5	0	571	81	528.25	551	197.5	43.75	0	149.5	0	53.25	197.75
# 28	495.5	341.75	233	64.75	562.75	286.5	73.75	72.75	438	393	93	67	70.75	0	3.5	8.5	244	85.75	199.75	358.5	13	0	693	899.75	46.75	275.75	88.5	329.5	183.25	8.95824	700.5	428.25	67.5	0	912.5	113.75	416.5	186.75	602	269.75	460.5	453.25	1005.5	289.25	39.75	315	7.75	287.25	239.5
# 29	0	48	0	6.25	186	0	110	10	52	5.5	0	0	84	0	55.25	0	0	179.5	0	430	10.5	0	58.25	0	20.25	5.75	0	0	0	0	105.75	162.75	12.25	7	821.75	5069.75	0	0	0	0	0	43.75	0	0	0	4.75	0	0	0
# 30	137.5	245	58	46.5	1041.5	0	64	33.5	286.25	2020.25	32	44.25	55.25	0	22.75	0	201.75	165	152	320.25	0	19.25	255	789.5	33	277.5	65.75	250	83.25	12.5565	594.75	437.75	39.75	31.5	769.75	106.75	14.5	105.25	159.75	213.5	420.25	78	1060.75	261.75	12.75	220	52	106.25	108.75
# 31	491.75	316.25	410.75	14.75	238.25	615.75	43	277.75	603	30.25	47.5	61.25	39	0	16.5	7	0	5.5	187.75	939.25	17.25	56.75	21.25	0	51.75	125.25	45.25	104.75	9.75	19.1224	272.75	158.25	141.5	119	1218	156.75	736.75	163.5	1035.25	106.25	444.75	702	314.5	36.5	21.5	548.25	0	737	224
# 32	589.75	324.75	149.5	80.75	993.25	157.25	87.75	12.75	403.5	1000	84.5	53.75	53.5	0	2.25	13.25	290	145.25	135	343.75	17.75	0	1688	909.5	21	195	54.75	284	48.5	2.38048	806.25	453	63.5	0	789.25	90.5	343.25	148.75	488	293.5	566	327.25	1299.75	383.75	19	296.5	59.25	108	203.25
# 33	0	14.25	0	0	0	99.25	11	0	0	0	0	0	0	0	0	0	0	0	0	0	0	0	18	0	0	0	63.75	0	0	0	0	0	0	0	87.5	0	0	0	24.75	0	0	0	0	1841	0	0	0	0	0
# 34	722.75	47.5	9	0	2523	56.75	12.75	21.25	20	4086.25	0	0	4	0	39.75	0	0	142.75	12.5	227.25	0	0	2100.25	0	0	372.5	99.25	0	0	28.1943	40	350.75	15	0	533.5	18.75	0	0	0	0	847.5	0	66.5	921.5	0	25	0	0	0
# 35	128.25	0	0	0	0	89	0	0	0	0	0	0	0	0	0	0	0	0	0	0	0	0	0	0	0	0	0	0	0	0	0	0	0	0	55.75	0	0	0	147	0	0	0	0	945.75	0	0	0	0	0
# 36	502	66.25	0	2.5	3074.25	0	38.75	0	0	4484.5	0	0	0	0	0	0	0	80	0	0	0	0	4822	0	0	186	8.75	24.5	0	0	61.75	258.25	6.5	4.25	271.5	0	0	0	0	0	864.25	0	148.75	1857.75	0	0	0	0	0
# 37	0	18	0	0	0	0	40	0	163.75	0	0	0	0	0	0	0	0	21.5	0	36.25	0	0	0	0	0	0	0	0	0	7.54983	0	0	0.5	0	46.75	0	148.5	0	0	206.75	0	0	0	0	0	0	0	0	0
# 38	361.75	863.75	756.5	0	2549.5	101.25	77	56	340.5	2925.75	191	763.5	71	0	186.25	140	863.5	81	146	605.75	0	117	190.25	2554.25	124	430.25	601	0	57.25	14.7874	1678.75	695.75	157.75	101.75	1098.5	77.25	463.75	358.75	2015.5	1304.75	650.5	406	421.25	303	2087.75	729.5	34.75	0	594
# 39	0	199.25	0	0	0	1147.25	432.25	1	0	0	0	0	388.75	0	3094.25	13.5	0	0	0	0	98.25	0	0	0	913.5	0	0	0	0	6.84957	0	0	68	0	3020.5	787.75	437.5	0	0	0	0	0	0	110.5	0	0	0	366.25	0
# 40	0	143.75	48.25	0	2781.5	377.5	136.25	0	0	4397	0	0	0	0	2030.25	0	0	54.25	0	0	0	0	7032.5	0	144.5	195.75	0	0	0	19.2007	0	318	21	0	1607.5	525	0	0	0	0	1434.25	47.25	0	36.5	0	0	0	0	0
# 41	0	0	0	0	49.75	58.25	10.5	20.75	0	0	0	0	47.5	0	826.25	0	0	0	0	77.5	0	0	0	0	5.5	0	0	0	0	15.3297	0	0	59.75	0	1496.25	633.5	64.25	0	0	0	0	0	0	129.25	0	2.75	0	0	0
# 42	0	0	0	0	92	0	0	0	0	0	0	0	0	0	81	8	0	0	0	0	0	0	7.25	0	0	0	0	0	0	0	0	0	0	0	27	153.5	0	0	0	0	0	0	0	0	0	0	0	0	0
# 43	1016.5	861.25	382.5	345.5	2087	127.75	175.75	131.75	1326.75	357.75	951.75	234.75	643.75	204.5	203.5	62	2140.25	815	764	1495.5	1034	355.25	30	1351.5	273.25	775.75	457	529.5	719.25	106.649	1197.5	1124	101	630	1845.75	542.75	2251	636	940.25	1256.75	5485.25	774.75	1490.75	136	1709.75	854.5	125	1147.5	224.5
# 45	134	169.25	164	51.25	224.5	22	84	2.5	510.75	60.25	38.5	86.5	0	0	20	0	0	0	29	587.5	5.75	26.5	31	38.5	23	66	312.5	7.5	13.75	0	100.5	280.5	41.75	0	835	13	1135.75	0	54.25	416.25	256.5	20.5	312.25	82.5	0	67.25	0	82.5	37
# 47	543.75	728.75	401.75	307.25	1088	299	185	17.5	553.5	583.25	344	832.75	45.25	2493.75	412.75	50	586.25	170.25	1621.75	1045.25	141.75	205.75	23.5	1416	737.25	408.5	605	174.75	552.5	26.1661	763.5	882	163.25	325.25	1991.5	363.25	81.75	536.5	1869	3831.75	906.5	635.25	626.25	1086.5	80.5	509.5	112.25	330	486.25
# 51	1210.75	966.25	209	204.5	422.25	204.25	124.25	22	609	175	196.25	154	36	0	0	19	1513.5	320.75	325	1928	124.75	100.25	48	1108	358	421	212.25	138.25	557	12.3558	620.75	598.75	87	112.75	2307.75	768	21.25	110.5	1439.25	601.75	1658.25	730.5	687.75	1501	36	1071.25	200.5	153.25	67
# 52	1205.75	1175.75	178.5	33.75	359	148.5	78.5	7.5	787.5	60.75	199.75	538	79.75	0	6.25	46.5	467.5	13	150	2593.25	144.25	20.75	61.25	0	198.25	756.25	181	68.25	563.75	37.5	753.75	542.25	148.75	163	1804.5	1167.5	92.25	844.25	1934	1208	3033.25	325.5	570.25	77.75	0	1571.5	54.25	125.75	67.5
# 53	266.5	304.5	21	0	120.75	623.5	131.5	12.75	84	0	151	0	0	0	0	0.25	0	7	0	784.25	282.5	258.75	100.25	0	0	0	0	0	0	11.4419	0	59	52.25	0	569.75	461.75	25.5	0	486	824.25	1156	14.5	29.25	360.5	0	0	0	0	0
# 54	675.25	145	81.75	0	115.75	14.75	118.25	19.75	335	28.75	128.75	249.25	33	0	64	73.25	0	74.25	21.75	1273.25	0	0	28.5	188.5	40.75	10.75	411	4.5	0	17.9351	26.25	1.25	16	60.25	4390.75	0	1191.25	29.25	214.5	120.5	0	17.75	195.5	5.5	0	110.75	0	0	3.25
# 55	0	0	0	0	0	0	0	0	0	0	0	0	0	0	0	0	0	0	0	0	0	0	0	0	0	0	0	0	0	0	0	0	0	0	0	0	0	0	0	0	0	0	0	0	0	0	0	0	0
# 56	117	0	0	0	3888.75	0	0	4	0	5721.75	0	0	0	0	0	17	0	1	0	0	0	0	1599.5	0	0	135.5	0	0	0	0	0	348.25	0	0	0	0	0	0	0	0	1235.75	0	79.5	15.5	0	0	0	0	0
# 57	0	0	0	0	0	0	22.75	12	0	0	0	0	0	0	0	0	0	0	0	0	0	0	0	0	0	0	0	0	0	0	0	0	2.5	0	0	0	0	0	0	0	0	0	0	0	0	0	0	0	0
# 58	311.5	0	0	0	3254	0	25.25	0	0	5443.5	0	0	14.75	0	0	0.25	0	0	0	0	5	0	3491	0	0	0	0	0	0	14.8549	0	340.5	0	0	0	0	0	0	0	0	945.75	0	22	0	0	0	0	0	0
# 60	0	0	0	0	0	0	0	3.5	0	0	0	0	0	0	0	35.75	147.25	0	0	138.25	0	0	0	0	0	0	6.5	0	0	22.8965	0	0	0	61.25	360.5	68	3	0	0	0	0	0	69.75	6.5	0	0	0	0	0
# 61	0	0	0	0	3449	0	0	0	23.25	4961	0	0	0	0	7	3.25	0	32.25	0	38	0	0	3190	0	0	193.75	0	0	0	6.13052	0	284.75	4.75	9	429.5	51.75	0	0	0	13.5	1513.5	0	242.25	8.25	0	31.75	0	0	0
# 62	0	0	111.25	0	0	0	0	0	0	0	0	0	0	0	80	0	0	0	0	202.5	0	0	0	0	0	0	0	0	0	13.5739	0	0	0	21.5	0	0	1.5	0	0	0	949.5	0	0	0	0	0	0	0	0
# 63	905.5	0	88	0	4313.25	0	7	0	0	6405.25	0	0	0	0	79	8	0	90.75	0	0	35.5	0	5624.5	0	0	148	2.75	0	0	0	0	593.25	0	0	208.5	49.75	38	0	0	0	1085	0	0	0	0	0	0	0	0
# 64	0	0	0	0	0	0	46.5	0	0	0	0	0	72	0	929.5	1	0	0	0	0	0	0	0	0	0	0	0	0	0	3.30404	0	0	58.5	0	1407	219	52.25	0	0	0	0	0	106.5	6.25	0	9	0	0	0
# 65	0	0	0	0	0	0	4	0	0	0	0	0	0	0	358.5	0	0	0	0	0	0	0	0	0	0	0	0	0	0	0	0	0	0	0	103	560.5	0	0	0	0	0	0	227.5	4.75	0	0	0	0	0
# 66	0	0	0	0	168.25	153.75	0	0	0	0	0	0	0	0	361.5	0	0	0	0	0	0	0	0	0	0	0	0	0	0	0	0	0	0	4.5	137.75	13.75	0	0	0	0	22.75	0	0	0	0	0	0	0	0
# 67	0	0	0	0	1408.25	0	0	0	0	4801.25	0	0	0	0	285	56	0	0	0	0	0	0	56.75	0	0	0	0	0	0	0	0	670.5	0	0	169	0	0	0	0	0	981	0	0	0	0	0	0	0	0
# 68	0	0	0	0	698.25	0	10	0	0	0	0	0	0	0	1.25	0	0	0	0	0	0	0	12.25	0	0	0	0	0	0	0	0	0	6.25	0	0	0	5.75	0	0	2	158.75	0	0	0	0	0	0	0	0
# 69	7.5	0	0	0	531.5	0	16	9.75	0	514	0	0	51.75	0	556.25	7.25	0	0	0	0	0	0	57	0	0	0	0	0	0	3.20156	15.5	758.75	101.75	0	2426	888.75	20.25	12.75	0	0	394.5	0	0	4.75	0	26.25	0	0	0
# 70	0	0	0	0	0	0	8.75	0	0	0	0	0	0	0	0	0	0	0	0	0	0	0	0	0	0	0	0	0	0	5.35413	0	0	0	0	150.25	573	0	0	0	0	0	0	0	0	0	10.25	0	0	0
# 72	0	0	0	0	133.5	0	28.5	0	0	391	0	0	23.5	0	782	0	0	0	0	0	1.25	0	0	0	0	0	0	0	0	0	0	0	0	0	1965.25	832.25	39.75	0	0	0	80.5	0	0	273.25	0	0	0	0	0
# 73	0	0	0	0	52.75	0	0	0	0	465	0	0	0	0	0	0	0	0	0	111.5	0	0	7.75	0	0	0	0	0	0	7.54983	0	0	7	0	0	0	29	0	0	0	890.75	0	0	0	0	0	0	0	0
# 74	238.25	86	2	0	311	0	19.75	0	0	520.75	0	0	44.25	0	495	3.5	0	0	0	0	0	0	21.5	0	0	0	4.5	0	0	8.34666	0	0	25	0	1774.5	860.25	0	0	0	13.5	332.25	0	0	26.5	0	17.25	0	0	0
# 75	239	107.75	40.5	39.75	1265	0	89.5	0	62.5	1480.25	10	0	73.25	0	1216.5	0	0	41	0	0	28	0	1051.25	50.25	0	16	0	97.25	0	23.9305	112.5	611.25	23.5	0	1907.25	736	0	0	0	94.75	916.75	171.25	146.5	301.25	0	4.25	0	0	0
# 76	0	103.25	17.75	67	261	0	26.5	0	8.25	24	0	0	66.25	0	26.5	0	0	260.75	4.5	268.5	1	0	8.5	0	0	0	3	59	0	98.612	0	16	36	13.5	757.25	20.5	128.75	9.25	0	279.25	513	148.25	47	0	0	14.5	0	0	0
# 77	0	0	0	0	0	388.25	9	0	0	0	0	0	71.75	0	911	10.25	0	0	0	30.5	28.5	0	0.75	0	248.5	0	0	0	0	14.1745	0	0	555.25	0	4535.5	1539	183.5	0	0	0	0	0	0	110	0	52.5	0	0	0
# 78	20045	2728.25	2383	411.75	3600.25	854	2068.25	123.5	9731.25	2252.75	10778.2	2304	760.5	13567	516	2411.25	4363.5	2132.25	3561.5	6119.25	386	764.5	3330.5	4152.75	425.25	2443.25	586.5	5544	723.25	459.363	4321.75	5912	10776	3934	1847.5	14741.8	3237	8598.75	3050.75	1932.75	5325.25	7995	132.75	642.5	1482	4303.5	831.5	10136.8	4334.25
# 79	2340.25	3935.75	216.25	0	492.25	0	9.25	0	628.75	0	0	65.75	0	0	19.25	0	0	130.5	259.25	614.25	100.5	89.25	792.75	0	551.75	2836	554.25	204.5	0	0	43	10.25	149.25	0	5088	0	478.5	505	0	55.5	3	820.75	0	98.75	151	925.25	268.75	197	114.75
# 80	0	119	0	0	0	0	92.5	0	457.25	0	80.5	0	81.25	0	1974.5	0	0	251.5	103	0	82.25	0	0	0	1321.25	0	121.75	291.75	0	94.9614	0	203.75	588.5	135.25	2938.25	1521.5	78.25	0	0	24.25	810.25	582.5	0	2746	0	343	0	0	0
# 81	445.75	1636.75	1285.5	815	935.75	185.25	160.5	26	2580	172.5	1738	190.5	41	0	239.5	89.75	2437	1070	1506.5	3951	1521.25	272.75	108.75	1376.75	995	21766.2	956	765.75	0	29.5452	1689.5	2417	657.75	1037.5	2664	1986.75	144.75	301.5	3769.75	557.25	5364	6260.5	774	4237.75	463.75	1214.25	501.5	5458.5	1853
[truncated: 93 more columns]

## Sheet: AntiNeu5Gc v redmeat intake
Correlation between anti-Neu5Gc IgG (total and inhibitable) and red meat intake, NHS (N=338)
	Red meat servings
	None			<0.5 s/d			0.5-<1 s/d			1-<2 s/d			2+ s/d
	Mean	SD	N	Mean	SD	N	Mean	SD	N	Mean	SD	N	Mean	SD	N
Total	4.13	3.93	15	2.95	3.01	144	3.56	4.28	122	2.36	2.76	51	1.49	1.23	6
Inhibitable	2.17	3.33	15	0.95	2.48	144	1.62	3.85	122	0.73	2.68	51	0.3	0.42	6

## Sheet: NHS pilot#1
NHS Pilot #1: Split samples study (N=18 blinded duplicate plasma samples and 3 QC pool plasma replicates)
	Total anti Neu5Gc IgG	Inhibitable anti Neu5Gc IgG
P1	0.752933	0.2314
P2	0.768433	0.2075
P3	0.187	0.148667
P4	1.01843	0.234
P5	0.2432	0.142333
P6	0.105356	0.0749889
P7	0.149756	0.0795889
P8	0.145756	0.0957222
P9	0.316789	0.163956
P10	0.111556	0.0388556
P11	0.068	0.0342333
P12	0.0921333	0.0251
P13	0.123933	0.100033
P14	0.1822	0.0716
P15	0.104967	0.0682333
P16	0.149544	0.0758111
P17	0.180478	0.0572778
P18	0.284478	0.129844
P19	0.261244	0.0505111
P20	0.491178	0.0382444
P21	0.0898889	0.0479222
P22	0.105222	0.0546556
P23	0.137089	0.0556556
P24	0.0690889	0.0203556
P25	0.833756	0.0771222
P26	0.218689	0.0957555
P27	0.110522	0.0680889
P28	0.166056	0.154356
P29	0.121856	0.0807556
P30	0.206922	0.0970889
P31	0.0706222	0.0470556
P32	0.0823222	0.0346889
P33	0.0977223	0.0621222
P34	0.165589	0.0787222
P35	0.516789	0.0587556
P36	0.1069	0.0628333
P37	0.2861	0.0405667
P38	0.115567	0.0739333
P39	0.0861667	0.0275333
P40	0.0852667	0.0419667
P41	0.0780222	0.0746222
P42	0.0668556	0.0442222

## Sheet: NHS pilot #2
NHS pilot #2: Assay reproducibility over a 24–48 hours processing delay (N = 48 samples; 3 samples each from 16 individual donors)
	Total anti Neu5Gc IgG	Inhibitable anti Neu5Gc IgG
#001	2.7938	0.868217
#002	2.37907	1.69147
#003	5.53256	4.22713
#004	3.07132	1.65659
#005	2.88605	1.42016
#006	3.45116	1.90465
#007	2.35969	1.45349
#008	1.5814	1.05659
#009	2.17829	1.41163
#010	3.35647	2.07008
#011	2.29447	0.141959
#012	4.27022	2.17341
#013	7.42116	6.24079
#014	2.07704	0.372866
#015	1.6898	0.555256
#016	7.1615	5.92363
#017	4.47327	2.86523
#018	2.28908	0.555256
#019	4.65072	3.38814
#020	2.39465	1.55436
#021	1.20328	0.606469
#022	1.4863	0.590297
#023	5.33176	4.06289
#024	2.35871	1.39712
#025	2.4243	1.41599
#026	1.24281	0.550764
#027	4.90768	3.55256
#028	2.54847	1.63861
#029	6.07993	4.03316
#030	5.1131	3.28827
#031	7.59014	6.34524
#032	6.41071	4.84524
#033	1.72619	0.427721
#034	2.125	0.922619
#035	2.47364	1.07738
#036	5.69983	4.02721
#037	1.80312	0.819905
#038	4.66015	3.2267
#039	2.77784	1.33728
#040	2.25494	0.991311
#041	1.92081	-0.101106
#042	4.4453	3.08057
#043	2.81813	1.25276
#044	2.35841	1.33965
#045	1.9066	0.629542
#046	1.48019	0.863976
#047	2.68498	1.17788
#048	2.54223	1.59342
#049	1.56764	0.344544
#050	0.2358	1.38939
#051	0.313528	0.852018
#052	0.00182367	0.64574
#053	0.004021	0.621824

## Sheet: NHS pilot #3
NHS #3: Within-person reproducibility over 1–3 years (N = 94 samples; 2 samples each from 47 participants, N=338 for correlation with red meat intake)
ID	Total anti Neu5Gc IgG	Inhibitable anti Neu5Gc IgG
6828316	1.70662	-0.0585149
4057269	1.8975	-2.99919
8220074	9.40032	7.8293
4875838	8.60977	3.39266
4938192	3.05327	0.475787
4286712	0.128329	0.0435835
7130995	0.234867	0.205004
5012280	2.48386	-0.776029
5087489	5.95077	3.45964
4657807	7.99617	5.94854
6651191	1.19689	-0.214568
514674A	1.5516	-0.226445
4016794	3.00567	0.661124
5212906	2.49459	-0.0399842
546765A	-0.0628134	-0.0261283
7199701	1.27092	-0.0874901
5508099	8.82832	5.53048
572000A	9.07535	5.51702
5581103	2.80678	0.228356
7158592	2.84567	-0.155165
8244713	2.55416	-0.131326
5768360	1.92304	-0.0347135
5820457	1.26976	-0.371811
5142062	1.04015	-0.381012
4753906	1.30029	-0.218737
5822736	1.21037	-0.517775
7093290	2.34128	0.240485
5828061	1.775	0.314912
8745637	3.24079	1.13684
7781412	3.13904	1.31316
8650662	7.38377	7.42763
5881436	8.06798	5.84781
5928912	2.40746	-0.589912
6777378	3.63158	-0.352632
7007015	5.95658	3.77105
5963061	3.62807	0.884211
4064412	3.08735	-0.150936
6294432	4.05907	0.104739
6547501	1.48878	-0.591398
4146792	1.31196	-1.04699
6706222	1.31196	-0.253286
5126204	1.45772	-0.121864
6103127	2.37966	0
6763849	2.53936	-0.386699
6317791	4.89619	0.216647
6818429	3.0301	1.07255
6382507	7.95513	5.20314
7003645	7.59277	5.3547
6593627	1.58753	0.00201532
587673A	1.50611	-0.0745667
7031863	3.77818	1.87465
6109129	4.56295	2.11971
7090740	15.3981	14.1959
795392A	15.7983	14.5574
7152248	9.10138	6.86844
7256018	13.7038	11.4052
7695472	9.87845	7.86125
744420A	10.6991	8.79272
5883970	3.10942	0.816836
5945380	3.41906	1.13917
7501007	1.82812	0.262267
6366364	1.69783	0.28934
6914775	1.80147	-0.660745
751609A	1.67967	-0.762896
7527263	1.61812	-0.360208
7055579	1.59038	-0.294755
7596510	0.961855	-0.333333
5168339	1.44517	0.0294755
7851700	1.00477	-0.172085
5788338	0.944517	-0.161248
7852069	3.4287	-0.432596
7893680	1.72735	-0.198526
6544758	2.24276	-0.251375
4143921	1.69435	0.262376
8198822	1.82417	-0.351485
8215844	3.06839	-0.221122
910348A	0.0183352	-3.33113
5262448	2.94353	3.0352
822870A	3.51834	-0.127613
5499859	2.63935	-1.07536
4221560	2.89402	-0.155666
8086538	2.40757	-0.349345
8296904	2.71373	-0.575449
8314119	2.00776	-0.595827
7709186	1.83649	-0.83212
5085876	11.3338	7.84571
8362785	12.2465	8.99951
7881178	5.56817	3.42261
8539963	4.5541	3.04464
8696142	3.26735	1.36924
5771325	3.05645	0.509976
8714129	0.93528	-0.1382
8228972	1.31825	-0.19708
7387563	1.65158	-0.104136
8736327	1.25937	-0.273966
8200324	4.16496	1.4472
6982231	3.27445	0.799513
6858242	1.09489	-0.23017
8766486	1.28175	0.149392
7828279	5.68503	-0.818981
8775789	4.78781	0.313889
5241363	2.98225	0.728704
881126A	3.17485	1.1662
9019526	5.46651	3.09213
5488397	4.06188	1.79444
4776551	1.06698	0.0231481
5757937	1.25123	-0.202778
5475741	0.67716	-0.166667
4684443	6.6994	1.78515
8205315	4.14569	0.620101
4304199	2.43891	-0.29184
4973123	5.68834	1.11157
4991567	2.36422	-0.505763
429501A	2.60489	0.088059
4172188	3.74504	0.0594744
875358A	4.77639	0.941909
8154867	4.97418	1.96634
7509221	1.91782	-0.164206
9147213	3.55406	-0.614765
5689968	2.03908	0.414318
474249A	2.82655	-1.17136
6486725	1.80194	-0.500224
4846782	12.4628	9.09485
8918480	2.40328	-0.634452
5881429	2.69814	-0.50783
4692703	1.14422	-0.319016
5613638	2.22284	-0.331952
736229A	5.96961	0.0948435
4340420	1.4314	-0.160221
4802996	3.23297	0.67035
6693400	7.30617	4.6768
4023539	2.69982	-0.401934
7794195	1.92726	-0.522099
5613204	13.3227	10.8725
5177649	2.25138	0.407919
6194770	1.10534	-0.408012
5041590	2.88229	0.293769
6553426	2.16024	-0.147873
8266904	8.93323	6.13699
4623440	3.57765	0.935707
717608A	3.61375	0.916914
6183416	2.41543	-0.337784
7346190	1.57023	-0.133531
6684629	1.27992	0.101385
6434742	2.89019	-0.721766
8526962	1.24658	-0.314185
6826301	6.94607	4.65612
5992460	1.70848	0.420477
6626947	5.2118	2.13638
5525757	3.33294	-0.543962
5955189	6.96913	0.852677
6619874	1.19383	-0.724502
6919477	1.71278	-0.0683861
6602565	11.695	6.72914
4117387	1.00739	-1.15276
6977600	1.76152	0.913341
563617A	0.413274	-0.351874
8542365	9.21174	-0.390971
5919962	3.42658	-0.247884
9003027	2.12871	0.233374
8577162	3.15975	0.975413
5639421	5.92557	5.02499
4742814	1.9368	0.217445
6728981	3.26072	-0.230958
451292A	1.43025	-0.21335
6530898	1.49618	0.302211
7924829	1.27177	-0.359951
4684429	9.71526	8.06634
8465826	1.36432	0.478296
8755901	1.46833	0.382883
5457298	4.8504	4.276
8600542	0.84146	-0.131206
6883244	1.26034	-0.0164007
4490763	7.25768	1.35683
6319380	2.84501	0.350177
9014013	2.67745	1.08555
7794188	0.810431	0.0261525
4746368	1.14199	-0.534131
8603543	0.649084	0.657801
460599A	0.521868	0.0580674
8906884	0.783743	-0.137744
6475810	1.85574	0.0516022
6232795	1.20155	0.283812
8257023	2.53489	0.239284
8209535	2.83451	0.899293
818692A	7.50617	-0.942156
6788580	5.46289	1.83729
4790648	-0.0822583	-0.0436954
6377417	3.19906	0.365377
7416991	5.95651	1.78202
7417995	3.37497	1.40095
6650448	5.01538	-0.180986
511065A	0.641872	-0.266508
5855208	1.39883	-0.243039
6295813	1.49828	-0.075179
570272A	1.11761	-0.517104
4739055	1.23734	-0.159507
6507477	1.92708	0.461814
644669A	2.64536	0.705502
5655138	1.96737	-0.0517799
5616220	0.938646	-0.155744
8247538	2.44188	1.00809
4125848	2.03412	0.0865696
414708A	4.82012	2.17031
5637544	1.43662	-0.0796926
7642312	1.3096	-0.0109223
4848155	0.964132	-0.244337
5164253	3.17153	-0.124141
7039125	1.58477	0.0588488
6106174	3.14705	1.42698
6013947	2.08949	-0.254725
4791257	15.2145	11.9686
8653208	1.57574	-0.49957
6515215	5.03021	3.20275
6730333	17.2635	13.2143
8113775	1.60109	-0.536512
6536057	7.49198	6.50359
5231324	0.79298	0.188502
5418855	1.78413	1.2131
6785028	1.0094	0.322278
4118084	1.57601	0.571587
4228445	0.802653	0.3466
9053490	0.875345	0.00995025
4074405	3.79878	1.68905
8202040	10.0948	7.33389
4708478	1.58509	0.234315
6240981	1.88304	1.10348
6256239	7.84528	7.03747
5497019	0.372782	-0.767172
4373710	0.721875	0.0237883
8724217	1.05729	0.0561998
6459797	1.26871	-0.130538
5458164	1.27168	0.454356
7341106	0.236297	-0.248588
5475942	1.22891	-0.0639699
4933099	2.13013	-1.15585
8604498	1.31765	0.537159
8696093	1.51458	0.244591
5550452	2.34431	0.884917
8164257	2.55252	1.17811
6717890	2.28034	1.46472
5767278	4.22233	0.87551
5647858	1.15836	-0.0809031
5709797	0.899745	0.0269192
4646218	2.11377	1.57727
5547218	2.5365	-0.0475241
4363935	1.038	-0.0953805
6726462	0.956575	-0.16218
6490811	1.5498	0.275507
859246A	1.37698	0.164174
4303100	1.17492	-0.216351
6121962	10.5338	8.97375
4384551	1.21238	-0.025096
5964555	1.71578	-0.105698
8007891	1.9071	-0.348391
5627907	7.18581	4.59492
5049398	0.869304	-0.157957
7194319	1.42466	0.106584
552054A	1.28501	0.0903454
5006693	0.861628	-0.0168291
8652998	0.998622	0.0398583
8605075	0.759068	-0.0555556
4248438	0.922299	0.0899198
5255304	1.5168	0.652921
5069077	1.4727	0.728522
4554396	1.69349	0.460481
898608A	0.722986	-0.0678694
6493788	1.71754	0.480241
5105000	1.97041	-0.203322
4798245	4.90712	2.95447
4518601	0.91564	0.239897
4023384	0.779497	-0.599026
4670752	0.658833	-0.172256
643962A	1.7087	1.00602
6974165	0.726474	-0.270565
5278721	0.63447	-0.20149
7343713	0.847712	0.116366
8174306	2.89586	0.797363
4594935	1.28193	0.593007
860262A	0.545956	-0.0538922
7116549	2.28533	1.06958
8184151	2.30786	0.970915
6291167	0.746412	-0.0071286
7367732	0.892406	0.182777
8818812	1.11624	0.459937
5581760	1.15189	-0.0230967
6263527	3.21633	0.756487
883094A	5.20977	1.87967
8751897	0.844852	-0.171254
6333814	0.991641	-0.0617737
5020691	1.49378	-0.0587156
8323394	0.864424	-0.187768
4902017	2.69439	0.810398
6484686	3.15005	0.73578
4756632	3.83201	1.14985
8703044	2.20082	-0.355963
6578329	3.98002	1.71376
7666821	6.11264	3.15267
8192972	3.22612	1.99084
8641313	3.98185	1.91959
4683993	3.30806	1.49211
5826339	1.69534	0.479389
8191104	1.93707	0.389822
6605333	0.792027	-0.928753
815351A	1.01849	1.03969
8258250	2.21849	-0.34402
7213000	2.06199	0.408794
6300274	11.813	8.35294
6927247	33.0923	29.4813
9078995	3.5914	0.24183
7650097	0.982967	-0.21628
5254942	14.305	8.45039
4449565	2.6021	-0.257279
7234821	5.95563	3.72014
7524382	4.13745	0.582888
4437504	3.97361	0.668962
8222307	12.0929	9.90591
7335365	2.45209	-0.414228
4845443	2.77453	0.764773
8598085	3.66265	1.31153
6624442	10.685	7.58061
5293949	1.21744	-0.262192
5306666	7.21744	1.5743
4002327	1.17728	0.345955
4146337	1.97865	0.288557
5129999	2.68574	0.0628109
5209203	2.48238	-0.0360697
8778211	3.05763	-0.274254
7436818	1.68263	-0.131841
8477044	3.85427	0.0870647
586320A	4.43449	0.204602
8725926	2.6335	-0.0945274
6649419	9.56447	8.13371
5584506	2.31203	0.0126655
5247870	1.35579	0.107081
7389352	2.61831	-0.287277
8575704	3.00288	0.364421
9156227	7.0403	3.57168
5939970	5.75993	3.84974
7855172	2.92228	0.150835
8271832	4.43926	2.69833
8258933	1.85435	-0.0639033
8461469	1.43178	-0.00690846
9030298	1.21071	0.0201497
4230118	1.74496	-0.00345423
8992103	19.5227	17.1623
889784A	2.17271	1.14105
5695385	9.45769	7.49511
862144A	2.30167	0.500288
8247070	2.40069	0.51468
7110699	3.93437	2.11917
7795819	4.4117	2.4224
5144091	1.81838	0.253438
6306325	2.46933	0.121153
8831408	2.60751	0.0654879
5838375	2.80397	0.70465
7610724	2.68217	0.563851
7469551	11.1432	7.74984
7696684	3.18249	-0.485265
6557597	1.94608	0.0550098
5167751	2.92163	2.37559
6210036	1.52783	0.138233
9019639	0.497041	-0.002922
8035647	1.01446	-0.335131
5430246	0.500637	0.103844
7362251	1.11134	0.546415
4031972	1.2417	0.276691
8184754	1.6564	0.667341
6476203	0.952199	0.128343
6576787	0.843569	0.0809807
8976595	0.790573	0.36206
5399160	1.39558	0.407628
4666306	0.515684	-0.216444
8871503	0.791811	0.0123824
7385125	0.902014	-0.34423
5283459	0.4877	-0.424963
4822403	1.45427	0.632987
6305508	1.46368	0.219416
8410338	1.55017	0.736804
466327A	0.882301	0.119065
8621232	0.704427	0.00602555
4316510	0.670925	-0.192094
7142375	0.957259	-0.0737527
6714698	0.744195	0.0455531
7113731	1.23371	0.0737527
8348064	1.03149	-0.189684
563114A	3.84735	3.24681
7929707	0.783345	0.174312
872638A	0.792049	0.183251
7514174	0.436133	-0.00541049
5608668	0.422724	0.00940955
8349244	1.27358	-0.139732
6804054	1.05011	-0.0286991
563406A	1.01858	-0.0606916
4577083	3.30581	2.00565
8598776	0.956951	0.0383439
7391829	0.79078	0.14387
6117812	5.52254	3.10284
4874979	1.65957	0.125127
5170700	0.953647	0.0878926
5446819	1.17401	-0.340679
7289509	1.10765	-0.0914387
8669665	0.840679	0.0352077
7995685	0.68769	-0.0273556
7596252	0.867528	-0.0303951
8460458	2.19243	1.26377
6395650	2.10409	1.16349
7241683	1.02107	-0.141406
909650A	1.98096	1.04037
7222045	1.03732	-0.0634679
5482476	1.13531	-0.00634679
4869286	1.06956	0.270627
5696565	2.0556	1.15334
4313533	0.944656	0.132775
5237083	1.31407	-0.0986645
5774051	1.2969	-0.138457
560220A	2.5223	1.11365
8154970	1.04533	-0.0844917
6521274	0.938221	0.032979
5782551	0.524212	-0.0310711
5751822	10.9796	9.38621
556533A	1.44354	0.247751
5608562	0.576542	-0.0850368
4525128	1.69048	-0.0128008
8121143	0.916795	-0.0675883
602457A	4.47901	3.13108
8155525	12.9191	11.3909
